# Supplementary material for: Synthesising evidence on patient portals: a protocol for an umbrella review
Source: PubMed Central journal article supplement — BMJ Open. 2019 Mar 30;9(3):e024469. doi: 10.1136/bmjopen-2018-024469 (PMC6475229; doi:10.1136/bmjopen-2018-024469), 2019-03-30
Supplement: bmjopen-2018-024469.reviewer_comments.pdf [file bmjopen-2018-024469.reviewer_comments.pdf]

# BMJ Open

BMJ Open is committed to open peer review. As part of this commitment we make the peer review history of every article we publish publicly available.

When an article is published we post the peer reviewers' comments and the authors' responses online. We also post the versions of the paper that were used during peer review. These are the versions that the peer review comments apply to.

The versions of the paper that follow are the versions that were submitted during the peer review process. They are not the versions of record or the final published versions. They should not be cited or distributed as the published version of this manuscript.

BMJ Open is an open access journal and the full, final, typeset and author-corrected version of record of the manuscript is available on our site with no access controls, subscription charges or pay-per-view fees (<http://bmjopen.bmj.com>).

If you have any questions on BMJ Open's open peer review process please email [info.bmjopen@bmj.com](mailto:info.bmjopen@bmj.com)

# BMJ Open

## Synthesizing and Translating Evidence on Patient Portals: A Protocol for an Umbrella Review with Stakeholder Engagement

|                               |                                                                                                                                                |
|-------------------------------|------------------------------------------------------------------------------------------------------------------------------------------------|
| Journal:                      | <i>BMJ Open</i>                                                                                                                                |
| Manuscript ID                 | bmjopen-2018-024469                                                                                                                            |
| Article Type:                 | Protocol                                                                                                                                       |
| Date Submitted by the Author: | 27-May-2018                                                                                                                                    |
| Complete List of Authors:     | Petrovskaya, Olga; University of Alberta, Faculty of Nursing<br>Lau, Francis; University of Victoria<br>Antonio, Marcy; University of Victoria |
| Keywords:                     | patient portal, tethered personal health record (PHR), umbrella review, systematic review of reviews, review evidence                          |
|                               |                                                                                                                                                |

SCHOLARONE™  
Manuscripts

1  
2  
3 **Synthesizing and Translating Evidence on Patient Portals:**  
4  
5 **A Protocol for an Umbrella Review with Stakeholder Engagement**  
6

7 Petrovskaya O,<sup>1</sup> Lau F,<sup>2</sup> Antonio M<sup>2</sup>

8  
9  
10 <sup>1</sup>University of Alberta, <sup>2</sup>University of Victoria

11  
12 (corresponding author) Olga Petrovskaya, Faculty of Nursing, University of Alberta, 5-260,  
13  
14 ECHA 5 Fl., 11405-87 Ave. Edmonton, AB, Canada T6G 1C9, [olga.petrovskaya@ualbreta.ca](mailto:olga.petrovskaya@ualbreta.ca),  
15  
16  
17 1(780) 492 9903  
18

19 Olga Petrovskaya and Francis Lau contributed equally to this paper.

20  
21 Francis Lau, School of Health Information Science, University of Victoria, Victoria, Canada,  
22  
23 [fylau@uvic.ca](mailto:fylau@uvic.ca)  
24

25  
26 Marcy Antonio, School of Health Information Science, University of Victoria, Victoria, Canada,  
27  
28 [mantonio@uvic.ca](mailto:mantonio@uvic.ca)  
29

30  
31 Keywords: patient portal; tethered Personal Health Record (PHR); umbrella review; review  
32  
33 evidence  
34

35 Word count: 4195  
36

37  
38 **Abstract**  
39

40 Introduction

41  
42 Over the last two decades, patient portals have emerged as a noticeable eHealth strategy. Patient  
43  
44 portals provide patients with secure online access to their personal health information (e.g.,  
45  
46 summaries of doctor visits and lab results), sometimes with functions of secure messaging and  
47  
48 medication refill. Reported benefits of portals include enhanced patient engagement and  
49  
50 improved health outcomes. To date, research on patient portals including systematic reviews has  
51  
52 been rapidly increasing, making it difficult to form a coherent view on the current state of  
53  
54  
55  
56  
57  
58  
59  
60

1  
2  
3 evidence. Our umbrella review (or a review of reviews) aims to provide a meta-level synthesis to  
4  
5 make sense of the evidence on patient portals from published systematic reviews.  
6

## 7 8 Methods

9  
10 We will employ the Joanna Briggs Institute umbrella review method with four methodological  
11  
12 extensions. The search strategy encompasses multiple databases (e.g., MEDLINE, CINAHL)  
13  
14 without date- or language restrictions. The inclusion criterion is specific to various kinds of  
15  
16 systematic reviews focused on patient portal.  
17

## 18 19 Analysis

20  
21 Two independent researchers will screen titles/abstracts and then full-text articles against the  
22  
23 inclusion/exclusion criteria. Methodological quality of included reviews will be assessed and  
24  
25 data will be extracted from the final selection of reviews. A narrative meta-level synthesis will be  
26  
27 structured around the type of reviews (quantitative or qualitative); target population  
28  
29 characteristics; and type of outcome. We will use the Clinical Adoption Meta-Model as an  
30  
31 organizing framework.  
32  
33

## 34 35 Ethics and Dissemination

36  
37 As part of this review, we will create a guidance and roadmap and gather feedback from a small  
38  
39 group of eHealth stakeholders using a Delphi-like process. The evidence and feedback summary  
40  
41 will be disseminated among relevant stakeholders. We will also present at conferences and  
42  
43 publish the final report. The umbrella review does not require ethical approval. For a Delphi  
44  
45 component, appropriate guidance/approvals will be sought from our respective institutional  
46  
47 Ethics Review boards.  
48

## 49 50 **Article Summary**

### 51 52 **Strengths and limitations of this study**

53  
54  
55  
56  
57  
58  
59  
60

- This umbrella review (review) aims to produce a meta-level synthesis of the current state of evidence on patient portals
- The meta-level synthesis will summarize published quantitative and qualitative reviews into a coherent evidence-base on patient portals guided by an eHealth maturity model
- This review will include initial feedback from eHealth stakeholders to ensure the relevance and uptake of the evidence
- This review will be limited by the quality of and information provided in the published systematic reviews

## INTRODUCTION

During the past two decades, many western countries have introduced eHealth strategies and programs to support patients through a variety of electronic health technologies such as the patient portal.[1-3] For example, the Patient Portals & e-Views project funded by Canada Health Infoway was designed at the jurisdictional level to enable patients to assume an active role in their own health.[4] In England, the National Health Service Patient Online program allows patients to securely communicate with their health providers, schedule appointments, and view their GP record.[2] The US Office of National Coordinator for Health Information Technology has introduced the Patient Engagement Playbook as a web-based resource guide for health care providers and administrators to engage patients in their health and care through such technologies as patient portals linked to an electronic health record.[5]

Patient portal is a secure interface that provides patients with 24-hour online access to their personal health information such as recent doctor visits, discharge summaries, medications, allergies, immunizations, and lab results.[6,7] Some portals also enable patients to communicate with their care providers through secure email/text messaging as well as to schedule

1  
2  
3 appointments and request medication refills online. Patient portals, also known as tethered  
4  
5 personal health records, are maintained by healthcare organizations.  
6

7  
8 Organizations responsible for consumer-focused eHealth technologies tout the benefits of  
9  
10 patient portals including improved communication with care providers, better access to health  
11  
12 information and services, higher satisfaction level and quality of care, and increased motivation  
13  
14 and confidence in managing one's health.[4,5,8] For example, results from a patient survey  
15  
16 ( $n=1000$ ) during a six-month Canadian pilot project on the implementation of the "Citizen  
17  
18 Health Information Portal," suggested improved patient care and provider-patient  
19  
20 relationships.[9] Similarly, empirical studies have identified the benefits of patient portals.[10-  
21  
22 15] However, other studies cautioned about barriers to the use of patient portals among different  
23  
24 user groups. Factors influencing utilization of portals among patients include health literacy,  
25  
26 technological proficiency, educational level, and socioeconomic status.[16-18] Provider-specific  
27  
28 factors include concerns about workload and personal attitudes and perceptions influencing  
29  
30 adoption of portals among health providers.[19] Despite these mixed responses, promised  
31  
32 benefits of portals such as an enhanced patient engagement and improved health outcomes seem  
33  
34 to generate growing interest in this technology among various stakeholders.  
35  
36  
37  
38  
39

40  
41 Alongside policy conducive to the implementation and uptake of eHealth such as the US  
42  
43 Meaningful Use legislation,[20] research on the introduction, use and impact of electronic patient  
44  
45 portals has been rapidly increasing. In addition to hundreds of original research articles, multiple  
46  
47 systematic reviews on patient portals have been published in the past decade. These reviews are  
48  
49 focused on diabetes care,[21] pediatric population,[22] impact,[23] patient and provider  
50  
51 attitudes,[19] facilitators and barriers,[24] and technical development.[25] Thus, the evidence on  
52  
53 patient portal is dispersed across many publications. Moreover, the empirical evidence on portals  
54  
55  
56  
57  
58  
59  
60

1  
2  
3 is mixed. For instance, studies have reported varying results as to whether patient portals  
4  
5 utilization results in a decrease, increase, or no difference in the number of patient visits.[26-28]  
6  
7 These accumulating disparate findings have made it difficult for those involved with, or affected  
8  
9 by, patient portals to form a coherent view on the current state of evidence on the introduction,  
10  
11 use and effects of these technologies.  
12  
13

14  
15 With the volume of systematic reviews on eHealth technologies rapidly growing, a higher  
16  
17 or meta-level synthesis is required to make sense of the evidence from published reviews in a  
18  
19 given domain such as patient portals. The need for a systematic review of reviews on the topic of  
20  
21 patient portal is confirmed by our preliminary literature search, which identified only one meta-  
22  
23 level review explicitly referring to patient portals.[29] However, this integrative review by Jilka  
24  
25 et al.[29] is based on ten reviews published prior to 2015 and specifically focused on patient-  
26  
27 accessible electronic health records among adult populations. Thus, reviews on patient portals  
28  
29 were a subset of articles on patient access to electronic record. In light of these limitations, there  
30  
31 is a necessity for a current and more comprehensive systematic review of reviews addressing the  
32  
33 increasing utilization of patient portals. To address this knowledge gap, we will conduct an  
34  
35 umbrella review synthesizing present-day evidence on patient portals.  
36  
37  
38

39  
40 Our decision for selecting an umbrella review approach for this systematic review of  
41  
42 reviews was made following a scan of published higher-level reviews and relevant  
43  
44 methodological literature.[30,31] The literature scan revealed a disunity of terminology for  
45  
46 labeling higher-level reviews: umbrella review, overview, meta-review, review of systematic  
47  
48 reviews, review of reviews, and so on. *Meta-reviews* tend to focus on systematic reviews (SRs)  
49  
50 of randomized controlled trials (RCTs) and often include statistical meta-analyses.[e.g., 32-35]  
51  
52 *Reviews of SRs* and *overviews of reviews* tend to focus on quantitative SRs not exclusive to  
53  
54  
55  
56  
57  
58  
59  
60

1  
2  
3 RCTs. Some authors reserve the term *overviews* for syntheses of Cochrane SRs only.[36] In  
4  
5 contrast, *umbrella reviews* (UR) and *reviews of reviews* are usually more inclusive of different  
6  
7 types of SRs. In particular, UR “focuses on broad condition or problem for which there are  
8  
9 competing interventions and highlights reviews that address these interventions and their results”  
10  
11 [37, p. 95] to integrate evidence from multiple quantitative and qualitative SRs into one handy  
12  
13 document.[38] In fact, the Joanna Briggs Institute (JBI) claims that their UR methodology is “the  
14  
15 first to consider reviews that report other than quantitative evidence.”[39, p. 132] As our review  
16  
17 will include reviews of quantitative and/or qualitative primary studies, the research team decided  
18  
19 to adopt, with extensions, the JBI UR method.[40]  
20  
21  
22

23  
24 We anticipate that our contribution will be threefold. Our first contribution is substantive:  
25  
26 This UR will consolidate the current state of knowledge about patient portals. Given the rapidly  
27  
28 rising volume of systematic review literature to date, the UR method is the next logical step to  
29  
30 synthesize the review literature on portals in a more timely and efficient manner. Our second  
31  
32 contribution is methodological: We aim to apply a novel approach to appraising evidence that  
33  
34 supplements GRADE criteria modified by the Evidence-Based Practice Centers Program[41,42]  
35  
36 with a vote count (described below). Our third contribution relates to a knowledge-translation  
37  
38 component incorporated in our study. Specifically, the evidence produced in our UR will be used  
39  
40 in a Delphi-like process designed to generate initial feedback from the relevant eHealth  
41  
42 community (described below). This step aims to develop actionable guidance and a roadmap for  
43  
44 policy makers, health providers, and researchers to inform successful introduction and use of  
45  
46 patient portals. This stakeholder engagement is particularly important in a Canadian context  
47  
48 where some jurisdictions are actively embarking on the implementation of patient portals.  
49  
50  
51  
52

## 53 **REVIEW METHODOLOGY**

54  
55  
56  
57  
58  
59  
60



1  
2  
3 Our review of reviews will draw on the Joanna Briggs Institute (JBI) Umbrella Review (UR)  
4 methodology with some extensions to enhance the relevance of the evidence produced to eHealth  
5 stakeholders. This protocol adheres to the PRISMA-P guidelines[43] and has been submitted to  
6 PROSPERO<sup>1</sup> on May 22, 2018.  
7  
8  
9  
10  
11

## 12 **Objective and questions**

13  
14 The objective of this umbrella review is to summarize the current state of evidence on patient  
15 portals based on published systematic literature reviews and to provide guidance and a roadmap  
16 for those involved with this eHealth technology. Ultimately, our findings will be of interest not  
17 only to eHealth managers/directors, health providers, and researchers, but to patients and  
18 families affected by the introduction of patient portals. The questions addressed in this umbrella  
19 review are:  
20  
21  
22  
23  
24  
25  
26  
27

- 28 (a) What are the characteristics of the patient portals being introduced and used in different  
29 settings?  
30  
31
- 32 (b) What are the effects of patient portals on the organization, delivery and outcomes of care  
33 including provider and patient experiences?  
34  
35
- 36 (c) What are the factors that influence the introduction, use and effects of patient portals?  
37  
38
- 39 (d) How can we make this evidence actionable? (This is a question for a Delphi component and  
40 for the development of guidance and a roadmap for knowledge translation)  
41  
42  
43

## 44 **Conceptual framework**

45  
46 We will use the Clinical Adoption Meta-Model (CAMM)[44] as a framework to organize and  
47 make sense of the UR findings. The CAMM is a maturity model used to understand, describe  
48 and explain the introduction, use and effects of eHealth systems over time. It is a temporal model  
49 with five dimensions of availability, use, clinical/health behaviour, outcomes, and time. In this  
50  
51  
52  
53  
54

---

55  
56 <sup>1</sup> <http://www.crd.york.ac.uk/PROSPERO/>  
57  
58  
59

1  
2  
3 review, availability refers to the ability of users to access the patient portal. System use refers to  
4 user interaction and experience with the portal. Clinical/health behavior refers to changes in user  
5 behaviors from interacting with the portal. Outcomes refers to effects of portal use, which can be  
6 at the patient, provider, organization or population level. Time refers to the transition periods  
7 across the four dimensions.  
8  
9  
10  
11  
12  
13

### 14 **UR method**

15  
16 The JBI UR method is intended to provide an overall examination of a body of  
17 information that is available for a given topic.[40] Key features of the JBI UR is that it:

- 18  
19 (a) compiles evidence from multiple research syntheses that may be quantitative and/or  
20 qualitative in nature;  
21  
22 (b) includes reviews based on empirical studies rather than theoretical speculations or opinion  
23 (even if the review itself is titled *theoretical* or *critical*);  
24  
25 (c) summarizes evidence from existing reviews without any re-synthesis of the primary studies;  
26  
27 (d) publishes a protocol prior to conducting the meta-review;  
28  
29 (e) requires at least two researchers to conduct the meta-review;  
30  
31 (f) uses a standard JBI critical appraisal checklist to assess the methodological quality of the  
32 included reviews;  
33  
34 (g) uses the principles of Grading of Recommendations Assessment, Development and  
35 Evaluation (GRADE) to assess the overall strengths of the evidence [45]; and  
36  
37 (h) uses a set of predefined tables to present the quantitative and qualitative findings, and the  
38 overall summary of the quantitative and qualitative evidence.  
39  
40  
41  
42  
43  
44  
45  
46  
47  
48  
49  
50

51 In this review, we will extend the JBI UR method in four ways. First, we will apply the  
52 CAMM[44] to organize and make sense of the review findings. Second, we will reconcile the  
53  
54  
55  
56  
57  
58  
59  
60

1  
2  
3 primary studies across the reviews to eliminate duplicates (described below). Third, we will  
4 apply both the GRADE criteria modified by the Evidence-Based Practice Centers  
5 Program[41,42] and vote counting[46] as ways to determine the strength of evidence in the  
6 reviews. Fourth, we will add a Delphi component with a group of eHealth stakeholders to  
7 confirm the evidence to serve as guidance and a roadmap. This approach is consistent with the  
8 emerging effort to maximize knowledge translation through a partnership model by involving  
9 stakeholders in the review process.[47]  
10  
11  
12  
13  
14  
15  
16  
17  
18

19 Our systematic review of reviews will reflect methodological recommendations outlined  
20 by Pollock et al.[30] and Smith et al.[31] Of note is that these recommendations reinforce those  
21 presented in the JBI UR methodology.[39,40] Particular attention will be paid to what Pollock  
22 and colleagues[30] identified as eight methodological challenges affecting the quality of reviews  
23 of reviews: 1) overlap between reviews (studies appearing in more than one review); 2) outdated  
24 reviews; 3) “systematic reviews” that do not meet expected methodological standards; 4)  
25 assessment of methodological quality of reviews; 5) quality of reporting within reviews; 6)  
26 applying GRADE; 7) potential for publication bias; and 8) summarising key findings in brief  
27 accessible format suitable for informing decision making. Each of these areas will be addressed  
28 either below or in the final review report, as appropriate.  
29  
30  
31  
32  
33  
34  
35  
36  
37  
38  
39  
40  
41

## 42 **Search strategy**

43  
44 An academic librarian developed a comprehensive search strategy and assisted with  
45 searchers. Two search terms, a) *patient portal* and b) *systematic reviews*, were used in  
46 combination and adapted according to the databases, MeSH terms and Boolean rules, and other  
47 library best practices to maximize the retrieval of relevant citations. For example, synonyms for  
48 patient portal included patient web portal and tethered personal health record. Multiple search  
49  
50  
51  
52  
53  
54  
55  
56  
57  
58  
59  
60

1  
2  
3 terms for systematic reviews are listed in the following section. We searched multiple databases  
4  
5 on April 20, 2018: Ovid MEDLINE, Embase, CINAHL Plus with Full Text, Web of Science  
6  
7 Core Collection, Scopus, the Cochrane Database of Systematic Reviews, PROSPERO registry,  
8  
9 the JBI Database of Systematic Reviews and Implementation Reports, and Proquest Dissertations  
10  
11 & Theses. A MEDLINE search strategy is included as an online supplement.  
12  
13

14  
15 We searched for reviews published in any language (however, only English key terms  
16  
17 were used) and without any date restrictions. Patient portals appeared in the 1990s, and the  
18  
19 policy attention fueled their development and use in the 2000<sup>th</sup>. Incidentally, during this time,  
20  
21 various kinds of systematic reviews and overviews of systematic reviews started to flourish.  
22  
23 Thus, we anticipate that the bulk of retrieved citations will fall within the last decade. Due to the  
24  
25 recent emergence of patient portals, the issue of outdated reviews (i.e., Pollock et al.'s[30]  
26  
27 challenge #2) will likely be irrelevant in our UR. We are planning to supplement the above  
28  
29 searches by examining the reference lists of all included reviews for additional studies. We will  
30  
31 also search the first 100 citations in Google Scholar for missed reviews. The searches will be re-  
32  
33 run during an analysis stage to identify reviews published since the initial search.  
34  
35  
36

### 37 **Inclusion criteria**

38  
39  
40 The overarching inclusion criterion is systematic reviews focused on patient portal as the  
41  
42 topic. The types of reviews may include systematic review, meta-analysis, narrative review,  
43  
44 descriptive review, scoping review, qualitative review, theoretical review, realist review, critical  
45  
46 review, literature review, mixed methods reviews, qualitative evidence synthesis, rapid review,  
47  
48 review of reviews, overview, and umbrella review.[37,38] To be included, these reviews must be  
49  
50 based on empirical studies, even if the purpose of the review itself is theoretical or critical. We  
51  
52  
53  
54  
55  
56  
57  
58  
59  
60

1  
2  
3 will include reviews regardless of the year of publication. We will take note about the quantity  
4  
5 and the language of non-English reviews.  
6

7  
8 We will use the PICOS/PICo framework to provide explicit criteria on the types of  
9  
10 population (P), intervention (I), comparison (C), outcome (O), study design (S) and context (Co)  
11  
12 for inclusion[48] as described below.  
13

- 14  
15 • Population – patients regardless of demographic and disease characteristics, and also  
16  
17 health providers, consumers, researchers, educators, policy and/or decision makers, and  
18  
19 the public  
20
- 21  
22 • Intervention/exposure – patient portal; patient web portal; tethered personal health record  
23
- 24  
25 • Comparison – intervention vs. a non-exposed control group, pre vs. post, user vs. non-  
26  
27 user, and single cohorts only, as well as qualitative reviews not mentioning any  
28  
29 comparison  
30
- 31  
32 • Outcome – any types of effects including attitudes/behaviors, utilization, care processes,  
33  
34 economic value, health outcomes or policies  
35
- 36  
37 • Study design – any types of systematic reviews such as meta-analysis, narrative review,  
38  
39 descriptive review, scoping review, qualitative review, theoretical review, realist review,  
40  
41 critical review, literature review, mixed methods reviews, qualitative evidence synthesis,  
42  
43 rapid review, review of reviews, overview, and umbrella review. Reviews can include  
44  
45 any kind of empirical primary studies: experimental, quasi-experimental, observational,  
46  
47 mixed, and qualitative designs.  
48
- 49  
50 • Context – any organizational and practice settings in high-resource countries (e.g., the  
51  
52 US, UK, Canada, Netherlands)  
53

#### 54 **Exclusion criteria**

55  
56  
57  
58  
59  
60

- Reviews with multiple eHealth technologies where portal is just one of many technologies examined
- Reviews that include standalone (i.e., not tethered) personal health records controlled by patients (this topic will be addressed in a separate UR)
- Reviews addressing low- and medium-resource countries (this topic will be addressed in a separate UR)
- Reviews in languages other than English will be counted but not read and evaluated
- Reviews not based on primary empirical studies
- *Systematic* reviews that do not describe (at a minimum) the search strategy, inclusion criteria, and quality assessment methods. This inclusion/exclusion decision will happen at the stage of full-text screening or quality evaluation, and will address Pollock et al.'s[30] challenge #3.
- *Scoping* reviews that do not describe (at a minimum) the search strategy and inclusion criteria. Quality assessment is not expected in scoping reviews. This inclusion/exclusion decision will happen at the stage of full-text screening or quality evaluation.

### **Review selection**

Citations retrieved via searchers of electronic databases will be imported to Covidence<sup>2</sup>, a Cochrane-supported software designed for conducting systematic reviews. Two independent researchers will proceed through a series of steps: a) screening the titles and abstracts against the inclusion criteria; and b) screening the full-text articles that met the initial screening step, against the inclusion criteria. Excluded articles and the reasons for exclusion will be logged.

---

<sup>2</sup> <https://www.covidence.org/home>

1  
2  
3 Discrepancies will be resolved by consensus between the two researchers and/or by a third  
4  
5 researcher.  
6

### 7 **Methodological quality assessment**

8  
9  
10 Typically, the methodology for conducting review of reviews presupposes that the quality  
11  
12 of included reviews rather than the quality of primary studies is assessed. The purpose of quality  
13  
14 assessment is to assess methodological quality, risk of bias, and reporting quality.  
15

16  
17 Our UR will include reviews of diverse designs. Assessing different types of reviews  
18  
19 requires a recognition of the best-practice recommendations for each design. The quality of  
20  
21 systematic reviews included thus far will be assessed in the following manner:  
22

23  
24 Step one. The research team will compare six critical appraisal instruments: 1) the  
25  
26 AMSTAR tool by Shea et al.[49] with 11 quality criteria; 2) the AMSTAR 2 tool[50] with 16  
27  
28 items; 3) the ROBIS by Whiting et al.[51] with three phases to assess risk of bias in reviews; 4)  
29  
30 the McMaster 10 criteria quality assessment tool[52]; 5) the JBI critical appraisal checklist for  
31  
32 systematic reviews[40]; and 6) the ENTREQ framework for reporting the synthesis of qualitative  
33  
34 research.[53] One instrument will be selected.  
35  
36

37  
38 We anticipate that the JBI critical appraisal checklist for systematic reviews might be  
39  
40 suitable because a) it is part of the JBI UR method; b) it evaluates both quantitative and  
41  
42 qualitative reviews; and c) it is based on principles common across accepted quality assessment  
43  
44 tools. There are 11 questions in the JBI checklist each with a possible response of Yes, No or  
45  
46 Unclear. For example, Q5 asks “were the criteria for appraising studies appropriate?” and  
47  
48 requires that the included review provided details of the appraisal in either the methods section,  
49  
50 an appendix, or an online supplementary file. By tallying all Yes responses, a review can have a  
51  
52 score range of 0 to 11, with 11 being the highest quality.  
53  
54  
55  
56  
57  
58  
59  
60

1  
2  
3 Step two. Based on a selected tool, the research team will develop a rubric explicating  
4 how to interpret each of the tool's criteria for this specific review. In addition, we will determine  
5 the cut-off score for eliminating low quality reviews.  
6  
7  
8  
9

10 Step three. Using the agreed-upon rubric, one researcher (FL) will assess the quality of all  
11 included reviews, whereas the second and third researchers (MA, OP) will each assess 25% of  
12 reviews selected randomly. Any discrepancies will be discussed by all three researchers and  
13 resolved by consensus.  
14  
15  
16  
17  
18

19 For reviews of primary qualitative studies, risk of bias assessment designed for reviews  
20 of randomized and non-randomized intervention studies is not applicable. When assessing the  
21 quality of reviews of qualitative studies, for example trustworthiness, in addition to using the JBI  
22 checklist, we might consult other sources such as the CASP-Qualitative tool.[54,55] Scoping  
23 reviews will be assessed against the JBI methodology for Scoping Reviews.[56]  
24  
25  
26  
27  
28  
29

30 This step-wise process aims to address the issue of the absence of a universally-accepted  
31 quality assessment instrument and the ensuing attempts by reviewers to mitigate this challenge  
32 by recognizing the subjective component in applying quality assessment tools[57] and by  
33 modifying existing tools.[58] By paying close attention to the process of quality assessment, we  
34 are aiming to address Pollock et al.'s[30] challenges #4 and #5.  
35  
36  
37  
38  
39  
40  
41

#### 42 **Data Extraction**

43 We will use a standardised, pre-piloted form to extract data from the included reviews. We  
44 define quantitative studies as those where the results contain numerical values and/or statistical  
45 significance. We define qualitative studies as those where the results are reported in descriptive  
46 forms. Extracted information will include:  
47  
48  
49  
50  
51  
52  
53  
54  
55  
56  
57  
58  
59  
60



- 1  
2  
3 A. Characteristics of included reviews: Review reference (author-year-country), Date of  
4 search (years that the review covers), Objective of review, Types of studies / designs  
5 included in review, Number of included studies, and Country of included studies  
6  
7  
8  
9  
10 B. Setting focus of the review; Study population and participant demographics and baseline  
11 characteristics (Participants included in review; Number of participants included in  
12 review; Target condition being addressed in the review); Interventions included in review  
13 (Name or brief description; i.e., portal features); Comparisons included in review if  
14 applicable; Suggested mechanisms of interventions included in review; Outcomes  
15 included in review; Statistical data from quantitative studies reported in review such as  
16 Effect size, Confidence intervals, and Positive and negative predictive values is  
17 applicable; Major themes from qualitative studies reported in review; Study limitations  
18 reported in review  
19  
20  
21  
22  
23  
24  
25  
26  
27  
28  
29

30  
31 One researcher (FL) will extract all data independently. Two other researchers (MA, OP) will  
32 each extract data from 25% of randomly selected reviews. All three researchers will compare the  
33 outputs for consistency and resolve discrepancies through discussion. Missing data might be  
34 requested from review authors if necessary.  
35  
36  
37  
38  
39

#### 40 **Data synthesis**

41  
42 We anticipate that there will be no meta-analyses among our reviews (due to the lack of  
43 RCTs on the topic). In addition, we anticipate a significant heterogeneity of included reviews  
44 both in terms of designs and statistical tests (if any) they used. Therefore, we will provide a  
45 meta-level narrative, or descriptive, synthesis of the findings from the included reviews,  
46 structured around a) the type of reviews—quantitative or qualitative; b) target population  
47 characteristics, as appropriate; and c) type of outcome. The CAMM will be used as an  
48  
49  
50  
51  
52  
53  
54  
55  
56  
57  
58  
59  
60

1  
2  
3 overarching organizing framework to arrange the findings temporally based on the  
4  
5 implementation stage of patient portal in health organizations.  
6

7  
8 In the process of data synthesis, we will determine whether any subgroup description is  
9  
10 warranted. That is, whether and how different types of participants (e.g., by age, disease,  
11  
12 ethnicity, socioeconomic status); different portal features (e.g., self-scheduling of appointments,  
13  
14 direct messaging, access to test results); different contexts (e.g., country, acute or primary care  
15  
16 sector, provider or patient perspectives); or different types of reviews (e.g., systematic vs.  
17  
18 scoping; quantitative vs. qualitative) require separate presentation and exploration. This is a  
19  
20 qualitative synthesis and while subgroup descriptions may be undertaken, it is not possible to  
21  
22 specify the groups in advance.  
23  
24

25  
26 One researcher (FL) will conduct the synthesis, which will be checked by the other two  
27  
28 researchers (MA, OP). Discrepancies will be discussed to reach consensus among the three  
29  
30 researchers.  
31

### 32 33 Eliminating duplicates

34  
35 Following the JBI UR method, our review does not involve retrieving the primary studies.  
36  
37 Nevertheless, we intend to remove duplicates based on the information in the reviews included in  
38  
39 our review. This is a preparatory step for rating the evidence.  
40  
41

### 42 43 Rating the evidence

44  
45 For quantitative findings, we will first apply the vote counting method described by Lau  
46  
47 et al.[46] to quantify the evidence for each outcome. To do so, we will tally the number of  
48  
49 positive/neutral/negative results for each outcome based on the significant differences reported in  
50  
51 the study. An outcome will be considered positive if >50% of the results are positive and  
52  
53 statistically significant. Next, we will apply the GRADE method to determine the strength of  
54  
55  
56  
57  
58  
59  
60

1  
2  
3 evidence for each outcome. The GRADE method will follow the updated Guidance from the US  
4 Evidence-Based Practice Centre[41] as used by Gibbons et al.[42] in their evidence review of  
5  
6 consumer eHealth technology. Specifically, we will assign a score to each outcome according to  
7  
8 the five domains: study limitations, directness, consistency, precision and reporting bias. Then,  
9  
10 an overall grade—high, moderate, low or insufficient—will be assigned to reflect the level of  
11  
12 confidence that the estimated effect of the outcome is close to the true effect.[41]  
13  
14

15  
16  
17 Confidence in findings from qualitative research syntheses will be ascertained by  
18  
19 combing the ConQual approach developed by the JBI[59] and GRADE-CerQual approach[60].  
20  
21

22 The steps of eliminating duplicates and rating the evidence aim to address Pollock et  
23  
24 al.'s[30] challenges #1, #6 and #7.  
25

## 26 **Delphi component**

27  
28 As part of the synthesis, we will create a guidance and roadmap output to be used in a  
29  
30 Delphi-like process to gather initial feedback from selected eHealth stakeholders. A guidance  
31  
32 will consist of a set of propositions on how a healthcare organization may achieve the optimal  
33  
34 effects based on the evidence available, when implementing a patient portal. A roadmap will  
35  
36 consist of a visual model based on CAMM,[44] taking into account the above-mentioned  
37  
38 propositions in terms of their perceived feasibilities, priorities and interdependencies.  
39  
40

41  
42 Our Delphi component will be based on the technique used by other researchers to solicit  
43  
44 stakeholder feedback in eHealth studies.[61,62] Specifically, we will invite a purposive sample  
45  
46 of senior eHealth practitioners from the regional eHealth community to provide up to three  
47  
48 rounds of asynchronous feedback related to presented evidence (i.e., our review findings)  
49  
50 through a secure web-based survey. Examples of survey questions are:  
51  
52  
53  
54  
55  
56  
57  
58  
59  
60

- 1  
2  
3 (a) Do the guidance and roadmap documents provide any new information that you were not  
4 aware of earlier?  
5  
6  
7 (b) Do the guidance and roadmap documents make sense to you? If yes, in what ways? If  
8 not, why not?  
9  
10  
11 (c) Are the two documents helpful to your plans to introduce patient portals in your  
12 organization? If yes, in what ways? If not, why not?  
13  
14  
15 (d) What are the implications of the two documents to your organization's plans to  
16 implement patient portal?  
17  
18  
19  
20

21 Feedback from this small group of eHealth stakeholders will be incorporated into the final  
22 review output including the guidance and roadmap documents for subsequent knowledge  
23 translation effort with the larger eHealth community.  
24  
25  
26  
27

## 28 **ETHICS AND DISSEMINATION**

29  
30 The UR does not require approval of ethics boards. For a Delphi component, appropriate  
31 guidance/approvals will be sought from institutional Ethics Review boards at the University of  
32 Victoria and University of Alberta.  
33  
34  
35  
36

37 Based on the synthesized evidence, we will create the guidance and roadmap output to be  
38 used to gather feedback from selected Canadian eHealth stakeholders using a Delphi survey  
39 process, as explained above. The evidence and stakeholder feedback will be disseminated among  
40 the larger eHealth community. Ultimately, our findings will be of interest not only to eHealth  
41 managers/directors, health providers, and researchers, but also to patients and families affected  
42 by the introduction of patient portals. We will also present at conferences and publish the final  
43 report in a peer-review, preferably open access journal.  
44  
45  
46  
47  
48  
49  
50  
51  
52  
53  
54  
55  
56  
57  
58  
59  
60

## REFERENCES

1. Canada Health Infoway. *Consumer Health e-Services* [Internet]. Toronto: Infoway; n.d. Accessed on 2018 Mar 31. URL: <https://www.infoway-inforoute.ca/en/solutions/consumer-e-services>
2. National Health Service. *About Patient Online* [Internet]. England: NHS; n.d. Accessed on 2018 Mar 31. URL: <https://www.england.nhs.uk/patient-online/about-the-prog/>
3. Skipper J. *Individuals' Access to Their Own Health Information. ONC Policy Brief*. [Internet]. Washington DC: ONC; 2013 Jun 3 Accessed on 2018 Mar 31. URL: <https://www.healthit.gov/sites/default/files/pdf/individual-access-06-03-2012.pdf>
4. Canada Health Infoway. *Patient Portals & e-Views* [Internet]. Toronto: Infoway; n.d. Accessed on 2018 Mar 31. URL: <https://www.infoway-inforoute.ca/en/solutions/consumer-e-services/patient-portals-and-e-views>
5. Office of the National Coordinator for Health Information Technology. *Patient Access to Medical Records* [Internet]. Washington DC: ONC; 2018 Mar 21. Accessed on 2018 Mar 31. URL: <https://www.healthit.gov/topic/patient-access-medical-records>
6. Office of the National Coordinator for Health Information Technology. *What is a Patient Portal?* [Internet]. Washington DC: ONC; 2017 Sep 29. Accessed on 2018 Mar 31. URL: <https://www.healthit.gov/faq/what-patient-portal>
7. Brookstone A. *Patient Portals and Personal Health Records* [Internet]. *Canadian EMR*; 2012 Jun 7. Accessed on 2018 Apr 2. URL: <http://blog.canadianemr.ca/canadianemr/2012/06/patient-portals-and-personal-health-records.html>
8. National Health Service. *Patient Online: the Key Benefits* [Internet]. England: NHS; n.d. Accessed on 2018 Mar 31. URL: <https://www.england.nhs.uk/patient-online/learning-so-far/key-benefits>
9. eHealth Saskatchewan. *Citizen Health Information Portal: Personal Benefits of CHIP* [Internet]. SK: eHealth Saskatchewan; n.d. Accessed on 2018 Mar 31. URL: <https://www.ehealthsask.ca/citizen-engagement/CHIP/Pages/Personal-Benefits-of-CHIP.aspx>
10. Kipping S, Stuckey M, Hernandez A, et al. A web-based patient portal for mental health care: benefits evaluation. *J Med Internet Res* 2016;18(11),e294.
11. Kelly MM, Hoonakker PLT, Dean SM. Using an inpatient portal to engage families in pediatric hospital care. *J Am Med Inform Assoc* 2017;24(1);153-161.

12. Osborn CY, Mayberry LS, Wallston KA, et al. Understanding patient portal use: implications for medication management. *J Med Internet Res* 2013;15(7);e133.
13. Sarkar U, Lyles CR, Parker MM, et al. Use of the refill function through an online patient portal is associated with improved adherence to statins in an integrated health system. *Med Care* 2014;52(3);194-201.
14. Urowitz S, Wiljer D, Dupak K, et al. Improving diabetes management with a patient portal: qualitative study of a diabetes self-management portal. *J Med Internet Res* 2012;14(6);e158.
15. Wade-Vuturo AE, Mayberry LS, Osborn CY. Secure messaging and diabetes management: experiences and perspectives of patient portal users. *J Am Med Inform Assoc* 2013;20;519-525.
16. Davis SE, Osborn CY, Kripalani S, et al. Health literacy, education levels, and patient portal usage during hospitalizations. *AMIA Annu Symp Proc* 2015;1871-1880.
17. Gordon NP, Hornbrook MC Differences in access to and preferences for using patient portals and other eHealth technologies based on race, ethnicity, and age: A database and survey study of seniors in a large health plan. *J Med Internet Res* 2016;18(3);e50.
18. Tieu L, Schillinger D, Sarkar U, et al. Online patient websites for electronic health record access among vulnerable populations: portals to nowhere? *J Am Med Inform Assoc* 2017;24(e1);e47-e54.
19. Kruse CS, Argueta DA, Lopez L, et al. Patient and provider attitudes toward the use of patient portals for the management of chronic diseases: a systematic review. *J Med Internet Res* 2015;17(2);e40.
20. Gold M, McLaughlin C. Assessing HITECH implementation and lessons: 5 years later. *Milbank Q* 2016;94(3);654-687.
21. Amante DJ, Hogan TP, Pagoto SL, et al. A systematic review of electronic portal usage among patients with diabetes. *Diabetes Technol Ther* 2014;16(11);1-10.
22. Bush RA, Connelly CD, Fuller M, et al. Implementation of the integrated electronic patient portal in the pediatric population: a systematic review. *Telemed J E Health* 2016;22(2). doi: 10.1089/tmj.2015.0033
23. Ammenwerth E, Schnell-Inderst P, Hoerbst A. The impact of electronic patient portals on patient care: a systematic review of controlled trials. *J Med Internet Res* 2013;14(6);e162.
24. Powell KR. Patient-perceived facilitators of and barriers to electronic portal use. *Comput Inform Nurs* 2017;35(11);565-573.

- 1  
2  
3 25. Otte-Trojel T, de Bont A, Rundall TG, et al. What do we know about developing patient  
4 portals? A systematic literature review. *J Am Med Inform Assoc* 2016;23(e1);e162-168.  
5  
6
- 7 26. Jones JB, Weiner JP, Shah NR, et al. The wired patient: Patterns of electronic patient  
8 portal use among patients with cardiac disease or diabetes. *J Med Internet Res*  
9 2015;17(2);e42. doi:10.2196/jmir.3157  
10
- 11 27. Kruse CS, Bolton K, Freriks G. The effect of patient portals on quality outcomes and its  
12 implications to meaningful use: A systematic review. *J Med Internet Res* 2015;17(2);e44.  
13
- 14 28. Leveille SG, Mejilla R, Ngo L, et al. Do patients who access clinical information on  
15 patient internet portals have more primary care visits? *Med Care* 2016;54(1);17-23.  
16 doi:10.1097/MLR.0000000000000442  
17
- 18 29. Jilka SR, Callahan R, Sevdalis N, et al. "Nothing about me without me": An  
19 interpretative review of patient accessible electronic health records. *J Med Internet Res*  
20 2015;17(6);e161.  
21
- 22 30. Pollock A, Campbell P, Brunton G, et al. Selecting and implementing overview methods:  
23 implications from five exemplar overviews. *Syst Rev* 2017;6;145. doi:10.1186/s13643-  
24 017-0534-3  
25
- 26 31. Smith V, Devane D, Begley CM, et al. Methodology in conducting a systematic review  
27 of systematic reviews of healthcare interventions. *BMC Med Res Methodol* 2011;11;15.  
28
- 29 32. Benbassat J, Taragin MI The effect of clinical interventions on hospital readmissions: a  
30 meta-review of published meta-analyses. *Isr J Health Policy Res* 2013;2;1.  
31
- 32 33. Parke HL, Epiphaniou E, Pearce G, et al. Self-management support interventions for  
33 stroke survivors: A systematic meta-review. *PLoS ONE* 2015;10(7);e0131448.  
34
- 35 34. Pinnock H, Parke HL, Panagioti M., et al. Systematic meta-review of supported self-  
36 management for asthma: a healthcare perspective. *BMC Med* 2017;15;64.  
37
- 38 35. Savard LA, Thompson DR, Clark AM A meta-review of evidence on heart failure disease  
39 management programs: the challenges of describing and synthesizing evidence on  
40 complex interventions. *Trials* 2011;12;194.  
41
- 42 36. Hartling L, Chisholm A, Thomson D, et al. A descriptive analysis of overviews of  
43 reviews published between 2000 and 2011. *PLoS ONE* 2012;7;e49667.  
44
- 45 37. Grant NK, Booth A. A typology of reviews: an analysis of 14 review types and  
46 associated methodologies. *Health Info Libr J* 2009;26;91-108.  
47
- 48 38. Pare G, Trudel MC, Jaana M, et al. Synthesizing information systems knowledge: a  
49 typology of literature reviews. *Information & Management* 2015;52;183-199.  
50  
51  
52  
53  
54  
55  
56  
57  
58  
59



- 1  
2  
3  
4  
5  
6  
7  
8  
9  
10  
11  
12  
13  
14  
15  
16  
17  
18  
19  
20  
21  
22  
23  
24  
25  
26  
27  
28  
29  
30  
31  
32  
33  
34  
35  
36  
37  
38  
39  
40  
41  
42  
43  
44  
45  
46  
47  
48  
49  
50  
51  
52  
53  
54  
55  
56  
57  
58  
59  
60
39. Aromataris E, Fernandez R, Godfrey CM, et al. Summarizing systematic reviews: methodological development, conduct and reporting of an umbrella review approach. *Int J Evid Based Healthc* 2015;13;132-140. doi:10.1097/XEB.0000000000000055
  40. Aromataris E, Fernandez R, Godfrey C, et al. Chapter 10: Umbrella Reviews. In: Aromataris E, Munn Z (Editors). *Joanna Briggs Institute Reviewer's Manual*. [Internet]. The Joanna Briggs Institute, 2017. Accessed on 2018 Apr 2. URL: <https://reviewersmanual.joannabriggs.org/>
  41. Berkman ND, Lohr KN, Ansari MT, et al. Grading the strength of a body of evidence when assessing health care interventions: an EPC update. *J Clin Epidemiol* 2015;68(11);1312-1324.
  42. Gibbons MC, Wilson RF, Samal L, et al. Impact of Consumer Health Informatics Applications. Evidence Report/Technology Assessment No. 188. (Prepared by Johns Hopkins University Evidence-based Practice Center under contract No. HHS 290-2007-10061-I). AHRQ Publication No. 09(10)-E019. Rockville, MD. *Agency for Healthcare Research and Quality*. Oct 2009.
  43. Shamseer L, Moher D, Clarke M, et al. Preferred reporting items for systematic review and meta-analysis protocols (PRISMA-P) 2015: elaboration and explanation. *BMJ* 2015;350:g7647. doi:10.1136/bmj.g7647
  44. Price M, Lau F. The clinical adoption meta-model: a temporal meta-model describing the clinical adoption of health information systems. *BMC Med Inform Decis Mak* 2014;14(43);1-10.
  45. Guyatt G, Oxman AD, Akl EA, et al. GRADE guidelines: 1. Introduction-GRADE evidence profiles and summary of findings tables. *J Clin Epidemiol* 2011;64;383-394.
  46. Lau F, Kuziemski C, Price M, et al. A review of systematic reviews on health information system studies. *J Am Med Inform Assoc* 2010;17;637-645.
  47. Haynes RB, Wilczynski N, the Computerized Clinical Decision Support Systems (CDSS) Systematic Review Team. Effects of computerized clinical decision support systems on practitioner performance and patient outcomes: Methods of a decision-maker-research partnership systematic review. *Implement Sci* 2010;5(12);1-8.
  48. Stern C, Jordan Z, & McArthur A. Developing the review question and inclusion criteria. *Am J Nurs* 2014;114(4);53-56.
  49. Shea BJ, Grimshaw JM, Wells GA, et al. Development of AMSTAR: a measurement tool to assess the methodological quality of systematic reviews. *BMC Med Res Methodol* 2007;7;10. doi:10.1186/1471-2288-7-10



- 1  
2  
3 50. Shea BJ, Reeves BC, Wells G, et al. AMSTAR 2: a critical appraisal tool for systematic  
4 reviews that include randomised or non-randomised studies of healthcare interventions,  
5 or both. *BMJ* 2017;358;j4008.  
6  
7  
8 51. Whiting P, Savovic J, Higgins JPT, et al. ROBIS: a new tool to assess risk of bias in  
9 systematic reviews. *J Clin Epidemiol* 2016;69;225-234.  
10  
11 52. National Collaborating Centre for Methods and Tools. *Health Evidence™ Quality*  
12 *Assessment Tool*. Hamilton, ON: McMaster University. September, 2017. Accessed on  
13 2018 May 18. URL: <http://www.nccmt.ca/resources/search/275>.  
14  
15  
16 53. Tong A, Flemming K, McInnes E, et al. Enhancing transparency in reporting the  
17 synthesis of qualitative research: ENTREQ. *BMC Med Res Methodol* 2012;2;181.  
18 doi:10.1186/1471-2288-12-181  
19  
20  
21 54. Critical Appraisal Skills Programme. *CASP: Qualitative Checklist*. [Online] 2018.  
22 Accessed on 2018 May 18. URL: [www.casp-uk.net](http://www.casp-uk.net).  
23  
24  
25 55. Hawker S, Payne S, Kerr C, et al. Appraising the evidence: reviewing disparate data  
26 systematically. *Qualit Health Res* 2002;12(9);1284-1299.  
27  
28 56. Peters MDJ, Godfrey C, McInerney P, et al. Chapter 11: Scoping Reviews. In:  
29 Aromataris E, Munn Z (Editors). *Joanna Briggs Institute Reviewer's Manual*. The Joanna  
30 Briggs Institute, 2017. Accessed 2018 May 10.  
31 URL: <https://reviewersmanual.joannabriggs.org/>  
32  
33  
34 57. Murad MH, Mustafa R, Morgan R, et al. Rating the quality of evidence is by necessity a  
35 matter of judgment. *J Clin Epidemiol* 2016;74;237–238.  
36  
37 58. Pollock A, Brady MC, Farmer SE, et al. The purpose of rating quality of evidence differs  
38 in an overview, as compared to guidelines or recommendations. *J Clin Epidemiol*  
39 2016;74;238–240.  
40  
41  
42 59. Munn Z, Porritt K, Lockwood C, et al. Establishing confidence in the output of  
43 qualitative research synthesis: the ConQual approach. *BMC Med Res Methodol*  
44 2014;14;108.  
45  
46  
47 60. Lewin S, Glenton C, Munthe-Kaas H, et al. Using qualitative evidence in decision  
48 making for health and social interventions: an approach to assess confidence in findings  
49 from qualitative evidence syntheses (GRADE-CERQual). *PLoS Med* 2015;12;e1001895.  
50  
51 61. Logue MD, Efken JA Validating the personal health records adoption model using a  
52 modified e-Delphi. *J Adv Nurs* 2013;69(3);685-696.  
53  
54  
55  
56  
57  
58  
59

- 1  
2  
3 62. McGinn CA, Gagnon MP, Shaw N, et al. Users' perspectives of key factors to  
4 implementing electronic health records in Canada: a Delphi study. *BMC Med Inform*  
5 *Decis Mak* 2012;12(105);1-13.  
6  
7

## 8 9 **AUTHORS' CONTRUBUTIONS**

10 MA and FL developed the intellectual idea for the review. FL led the development of the study  
11 design and methods and analysis. MA and OP provided suggestions on study methods. OP  
12 collaborated with a librarian to develop the search strategy and procured a Covidence© seat. OP  
13 and FL drafted the protocol and its various components. MA contributed to the intellectual  
14 development of the protocol, commenting on drafts. FL, MA, and OP all helped to resolve  
15 disagreement and reach consensus.  
16  
17  
18  
19  
20  
21  
22  
23  
24

## 25 **ACKNOWLEDGMENTS**

26  
27 We would like to acknowledge Ms. Linda Slater, a health care librarian at the University of  
28 Alberta, Canada, for her able assistance with developing and pilot-testing comprehensive search  
29 strategies.  
30  
31  
32  
33

## 34 **FUNDING STATEMENT**

35  
36 This research received no specific grant from any funding agency in the public, commercial or  
37 not-for-profit sectors.  
38  
39  
40

## 41 **COMPETING INTERESTS STATEMENT**

42  
43 None  
44  
45  
46  
47  
48  
49  
50  
51  
52  
53  
54  
55  
56  
57  
58  
59  
60

**Synthesizing and Translating Evidence on Patient Portals:  
A Protocol for an Umbrella Review with Stakeholder Engagement**

Petrovskaya O,<sup>1</sup> Lau F,<sup>2</sup> Antonio M<sup>2</sup>

<sup>1</sup>University of Alberta, <sup>2</sup>University of Victoria

**Supplementary File  
MEDLINE Search Strategy**

**Ovid MEDLINE(R) Epub Ahead of Print, In-Process & Other Non-Indexed Citations, Ovid MEDLINE(R) Daily and Ovid MEDLINE(R) <1946 to Present>**

-----

1 patient portals/  
2 ((patient\* or consumer\*) adj2 portal\*).ti,ab,kf.  
3 (portal hypertension or portal vein\* or portal venous or ((proton or carbon) adj2 portal\*)).mp.  
4 2 not 3  
5 1 or 4  
6 (exp "Health Records, Personal"/ or "Patient Access to Records"/) and (electronic or online or internet or web or portal\* or tethered).mp.  
7 ((tethered adj3 record\*) or eclinician or mychart).ti,ab,kf.  
8 1 or 5 or 6 or 7  
9 meta-analysis.pt.  
10 (meta-anal\$ or metaanal\$).mp.  
11 ((quantitativ\$ adj3 review\$1) or (quantitativ\$ adj3 overview\$)).mp.  
12 ((systematic\$ adj3 review\$) or (systematic adj3 overview\$)).mp.  
13 ((methodologic adj3 review\$1) or (methodologic adj3 overview\$)).mp.  
14 (integrat\$ adj5 research).mp.  
15 (quantitativ\$ adj3 synthes\$).mp.  
16 ((qualitative\* adj3 (review\* or overview)) or (meta-synthes\* or metasyntes\*)).mp.  
17 or/9-16  
18 review.pt. or (review\$ or overview\$).mp.  
19 (medline or medlars or pubmed or index medicus or embase or cochrane).mp.  
20 (scisearch or web of science or psycinfo or psychinfo or cinahl or cinhal).mp.  
21 (excerpta medica or psychlit or psyclit or current contents or science citation index or sciences citation index or scopus).mp.

1  
2  
3 22 (hand search\$ or manual search\$).mp.  
4  
5 23 ((electronic adj3 database\$) or (bibliographic adj3 database\$) or periodical index\$).mp.  
6  
7 24 (pooling or pooled or mantel haenszel).mp.  
8  
9 25 (peto or der simonian or dersimonian or fixed effect\$).mp.  
10  
11 26 ((combine\$ or combining) adj5 (data or trial or trials or studies or study or result or results)).mp.  
12  
13 27 or/19-26  
14  
15 28 18 and 27  
16  
17 29 17 or 28  
18  
19 30 (hta\$ or health technology assessment\$ or biomedical technology assessment\$).mp.  
20  
21 31 technology assessment, biomedical/ or biomedical technology assessment/  
22  
23 32 30 or 31  
24  
25 33 29 or 32  
26  
27 34 8 and 33  
28  
29  
30  
31  
32  
33  
34  
35  
36  
37  
38  
39  
40  
41  
42  
43  
44  
45  
46  
47  
48  
49  
50  
51  
52  
53  
54  
55  
56  
57  
58  
59  
60

# Reporting checklist for protocol of a systematic review.

Based on the PRISMA-P guidelines.

## Instructions to authors

Complete this checklist by entering the page numbers from your manuscript where readers will find each of the items listed below.

Your article may not currently address all the items on the checklist. Please modify your text to include the missing information. If you are certain that an item does not apply, please write "n/a" and provide a short explanation.

Upload your completed checklist as an extra file when you submit to a journal.

In your methods section, say that you used the PRISMA-P reporting guidelines, and cite them as:

Moher D, Shamseer L, Clarke M, Ghersi D, Liberati A, Petticrew M, Shekelle P, Stewart LA. Preferred Reporting Items for Systematic Review and Meta-Analysis Protocols (PRISMA-P) 2015 statement. *Syst Rev.* 2015;4(1):1.

|                |     | Reporting Item                                                                                                                                                              | Page Number |
|----------------|-----|-----------------------------------------------------------------------------------------------------------------------------------------------------------------------------|-------------|
| Identification | #1a | Identify the report as a protocol of a systematic review                                                                                                                    | 1           |
| Update         | #1b | If the protocol is for an update of a previous systematic review, identify as such                                                                                          | n/a         |
|                | #2  | If registered, provide the name of the registry (such as PROSPERO) and registration number                                                                                  | 7           |
| Contact        | #3a | Provide name, institutional affiliation, e-mail address of all protocol authors; provide physical mailing address of corresponding author                                   | 1           |
| Contribution   | #3b | Describe contributions of protocol authors and identify the guarantor of the review                                                                                         | 24          |
|                | #4  | If the protocol represents an amendment of a previously completed or published protocol, identify as such and list changes; otherwise, state plan for documenting important | n/a         |

|    |                                         |                                                                                                                                                                                                                                  |          |
|----|-----------------------------------------|----------------------------------------------------------------------------------------------------------------------------------------------------------------------------------------------------------------------------------|----------|
|    |                                         | protocol amendments                                                                                                                                                                                                              |          |
| 1  |                                         |                                                                                                                                                                                                                                  |          |
| 2  | Sources                                 | #5a Indicate sources of financial or other support for the review                                                                                                                                                                | 24       |
| 3  |                                         |                                                                                                                                                                                                                                  |          |
| 4  | Sponsor                                 | #5b Provide name for the review funder and / or sponsor                                                                                                                                                                          | n/a      |
| 5  |                                         |                                                                                                                                                                                                                                  |          |
| 6  | Role of sponsor or funder               | #5c Describe roles of funder(s), sponsor(s), and / or institution(s), if any, in developing the protocol                                                                                                                         | n/a      |
| 7  |                                         |                                                                                                                                                                                                                                  |          |
| 8  |                                         |                                                                                                                                                                                                                                  |          |
| 9  |                                         |                                                                                                                                                                                                                                  |          |
| 10 | Rationale                               | #6 Describe the rationale for the review in the context of what is already known                                                                                                                                                 | 3,4,5    |
| 11 |                                         |                                                                                                                                                                                                                                  |          |
| 12 |                                         |                                                                                                                                                                                                                                  |          |
| 13 |                                         |                                                                                                                                                                                                                                  |          |
| 14 | Objectives                              | #7 Provide an explicit statement of the question(s) the review will address with reference to participants, interventions, comparators, and outcomes (PICO)                                                                      | 7,11     |
| 15 |                                         |                                                                                                                                                                                                                                  |          |
| 16 |                                         |                                                                                                                                                                                                                                  |          |
| 17 |                                         |                                                                                                                                                                                                                                  |          |
| 18 |                                         |                                                                                                                                                                                                                                  |          |
| 19 | Eligibility criteria                    | #8 Specify the study characteristics (such as PICO, study design, setting, time frame) and report characteristics (such as years considered, language, publication status) to be used as criteria for eligibility for the review | 10,11,12 |
| 20 |                                         |                                                                                                                                                                                                                                  |          |
| 21 |                                         |                                                                                                                                                                                                                                  |          |
| 22 |                                         |                                                                                                                                                                                                                                  |          |
| 23 |                                         |                                                                                                                                                                                                                                  |          |
| 24 |                                         |                                                                                                                                                                                                                                  |          |
| 25 |                                         |                                                                                                                                                                                                                                  |          |
| 26 | Information sources                     | #9 Describe all intended information sources (such as electronic databases, contact with study authors, trial registers or other grey literature sources) with planned dates of coverage                                         | 9,10     |
| 27 |                                         |                                                                                                                                                                                                                                  |          |
| 28 |                                         |                                                                                                                                                                                                                                  |          |
| 29 |                                         |                                                                                                                                                                                                                                  |          |
| 30 |                                         |                                                                                                                                                                                                                                  |          |
| 31 |                                         |                                                                                                                                                                                                                                  |          |
| 32 | Search strategy                         | #10 Present draft of search strategy to be used for at least one electronic database, including planned limits, such that it could be repeated                                                                                   | 10       |
| 33 |                                         |                                                                                                                                                                                                                                  |          |
| 34 |                                         |                                                                                                                                                                                                                                  |          |
| 35 |                                         |                                                                                                                                                                                                                                  |          |
| 36 |                                         |                                                                                                                                                                                                                                  |          |
| 37 | Study records - data management         | #11a Describe the mechanism(s) that will be used to manage records and data throughout the review                                                                                                                                | 12       |
| 38 |                                         |                                                                                                                                                                                                                                  |          |
| 39 |                                         |                                                                                                                                                                                                                                  |          |
| 40 |                                         |                                                                                                                                                                                                                                  |          |
| 41 | Study records - selection process       | #11b State the process that will be used for selecting studies (such as two independent reviewers) through each phase of the review (that is, screening, eligibility and inclusion in meta-analysis)                             | 12       |
| 42 |                                         |                                                                                                                                                                                                                                  |          |
| 43 |                                         |                                                                                                                                                                                                                                  |          |
| 44 |                                         |                                                                                                                                                                                                                                  |          |
| 45 |                                         |                                                                                                                                                                                                                                  |          |
| 46 |                                         |                                                                                                                                                                                                                                  |          |
| 47 |                                         |                                                                                                                                                                                                                                  |          |
| 48 | Study records - data collection process | #11c Describe planned method of extracting data from reports (such as piloting forms, done independently, in duplicate), any processes for obtaining and confirming data from investigators                                      | 14,15    |
| 49 |                                         |                                                                                                                                                                                                                                  |          |
| 50 |                                         |                                                                                                                                                                                                                                  |          |
| 51 |                                         |                                                                                                                                                                                                                                  |          |
| 52 |                                         |                                                                                                                                                                                                                                  |          |
| 53 |                                         |                                                                                                                                                                                                                                  |          |
| 54 | Data items                              | #12 List and define all variables for which data will be sought (such as PICO items, funding sources), any pre-planned data assumptions and simplifications                                                                      | 15       |
| 55 |                                         |                                                                                                                                                                                                                                  |          |
| 56 |                                         |                                                                                                                                                                                                                                  |          |
| 57 |                                         |                                                                                                                                                                                                                                  |          |
| 58 |                                         |                                                                                                                                                                                                                                  |          |
| 59 |                                         |                                                                                                                                                                                                                                  |          |
| 60 |                                         |                                                                                                                                                                                                                                  |          |

|    |                    |      |                                                                                 |       |
|----|--------------------|------|---------------------------------------------------------------------------------|-------|
| 1  | Outcomes and       | #13  | List and define all outcomes for which data will be sought,                     | 15    |
| 2  | prioritization     |      | including prioritization of main and additional outcomes, with                  |       |
| 3  |                    |      | rationale                                                                       |       |
| 4  |                    |      |                                                                                 |       |
| 5  |                    |      |                                                                                 |       |
| 6  | Risk of bias in    | #14  | Describe anticipated methods for assessing risk of bias of                      | 13,14 |
| 7  | individual studies |      | individual studies, including whether this will be done at the                  |       |
| 8  |                    |      | outcome or study level, or both; state how this information will                |       |
| 9  |                    |      | be used in data synthesis                                                       |       |
| 10 |                    |      |                                                                                 |       |
| 11 |                    |      |                                                                                 |       |
| 12 |                    |      |                                                                                 |       |
| 13 | Data synthesis     | #15a | Describe criteria under which study data will be quantitatively                 | n/a   |
| 14 |                    |      | synthesised                                                                     |       |
| 15 |                    |      |                                                                                 |       |
| 16 |                    |      |                                                                                 |       |
| 17 |                    | #15b | If data are appropriate for quantitative synthesis, describe                    | n/a   |
| 18 |                    |      | planned summary measures, methods of handling data and                          |       |
| 19 |                    |      | methods of combining data from studies, including any                           |       |
| 20 |                    |      | planned exploration of consistency (such as I <sup>2</sup> , Kendall's $\tau$ ) |       |
| 21 |                    |      |                                                                                 |       |
| 22 |                    |      |                                                                                 |       |
| 23 |                    |      |                                                                                 |       |
| 24 |                    | #15c | Describe any proposed additional analyses (such as                              | n/a   |
| 25 |                    |      | sensitivity or subgroup analyses, meta-regression)                              |       |
| 26 |                    |      |                                                                                 |       |
| 27 |                    |      |                                                                                 |       |
| 28 |                    | #15d | If quantitative synthesis is not appropriate, describe the type                 | 15,16 |
| 29 |                    |      | of summary planned                                                              |       |
| 30 |                    |      |                                                                                 |       |
| 31 | Meta-bias(es)      | #16  | Specify any planned assessment of meta-bias(es) (such as                        | 16    |
| 32 |                    |      | publication bias across studies, selective reporting within                     |       |
| 33 |                    |      | studies)                                                                        |       |
| 34 |                    |      |                                                                                 |       |
| 35 |                    |      |                                                                                 |       |
| 36 |                    |      |                                                                                 |       |
| 37 | Confidence in      | #17  | Describe how the strength of the body of evidence will be                       | 16,17 |
| 38 | cumulative         |      | assessed (such as GRADE)                                                        |       |
| 39 | evidence           |      |                                                                                 |       |
| 40 |                    |      |                                                                                 |       |
| 41 |                    |      |                                                                                 |       |

42 The PRISMA-P checklist is distributed under the terms of the Creative Commons Attribution License  
 43 CC-BY 4.0. This checklist was completed on 27. May 2018 using <http://www.goodreports.org/>, a tool  
 44 made by the [EQUATOR Network](#) in collaboration with [Penelope.ai](#)  
 45  
 46  
 47  
 48  
 49  
 50  
 51  
 52  
 53  
 54  
 55  
 56  
 57  
 58  
 59  
 60

# BMJ Open

## Synthesizing Evidence on Patient Portals: A Protocol for an Umbrella Review

|                                 |                                                                                                                                                |
|---------------------------------|------------------------------------------------------------------------------------------------------------------------------------------------|
| Journal:                        | <i>BMJ Open</i>                                                                                                                                |
| Manuscript ID                   | bmjopen-2018-024469.R1                                                                                                                         |
| Article Type:                   | Protocol                                                                                                                                       |
| Date Submitted by the Author:   | 07-Nov-2018                                                                                                                                    |
| Complete List of Authors:       | Petrovskaya, Olga; University of Alberta, Faculty of Nursing<br>Lau, Francis; University of Victoria<br>Antonio, Marcy; University of Victoria |
| <b>Primary Subject Heading</b>: | Health informatics                                                                                                                             |
| Secondary Subject Heading:      | Evidence based practice                                                                                                                        |
| Keywords:                       | patient portal, tethered personal health record (PHR), umbrella review, systematic review of reviews, review evidence                          |
|                                 |                                                                                                                                                |

SCHOLARONE™  
Manuscripts



1  
2  
3 **Synthesizing Evidence on Patient Portals:**  
4  
5 **A Protocol for an Umbrella Review**  
6

7 Petrovskaya O,<sup>1</sup> Lau F,<sup>2</sup> Antonio M<sup>2</sup>  
8  
9

10 <sup>1</sup>University of Alberta, <sup>2</sup>University of Victoria  
11

12 (corresponding author) Olga Petrovskaya, Faculty of Nursing, University of Alberta, 5-260,  
13 ECHA 5 Fl., 11405-87 Ave. Edmonton, AB, Canada T6G 1C9, [olga.petrovskaya@ualbreta.ca](mailto:olga.petrovskaya@ualbreta.ca),  
14  
15  
16  
17 1(780) 492 9903  
18

19 Olga Petrovskaya and Francis Lau contributed equally to this paper.  
20

21 Francis Lau, School of Health Information Science, University of Victoria, Victoria, Canada,  
22  
23 [fylau@uvic.ca](mailto:fylau@uvic.ca)  
24

25  
26 Marcy Antonio, School of Health Information Science, University of Victoria, Victoria, Canada,  
27  
28 [mantonio@uvic.ca](mailto:mantonio@uvic.ca)  
29

30  
31 Keywords: patient portal; tethered Personal Health Record (PHR); umbrella review; review  
32  
33 evidence  
34

35 Word count: 5092  
36

37  
38 **Abstract**  
39

40 Introduction  
41

42 Over the last two decades, patient portals have emerged as a noticeable eHealth strategy. To date,  
43  
44 research on patient portals has been rapidly increasing. Our umbrella review aims to provide a  
45  
46 meta-level synthesis to make sense of the evidence on patient portals from published systematic  
47  
48 reviews.  
49

50  
51 Methods  
52  
53  
54  
55  
56  
57  
58  
59  
60

1  
2  
3 We will employ a modified version of the Joanna Briggs Institute (JBI) umbrella review method.

4  
5 The search strategy encompasses multiple databases. The inclusion criterion is specific to  
6  
7  
8 systematic reviews focused on patient portal.

9  
10 Patients or public were not involved in this work.

## 11 12 Analysis

13  
14 Two researchers will independently screen titles/abstracts and then full-text articles against the  
15  
16 inclusion/exclusion criteria. Methodological quality of included reviews will be assessed and  
17  
18 data will be extracted from the final selection of reviews. These reviews will be categorized into  
19  
20 quantitative, qualitative, and/or mixed-synthesis groups based on information about the design of  
21  
22 primary studies provided in the reviews. Correspondingly, we will create quantitative,  
23  
24 qualitative, and/or mixed-synthesis Excel data-extraction tables. Within each table, data will be  
25  
26 extracted with the reference to primary studies as reported in the reviews, and will be synthesized  
27  
28 into themes and then a smaller number of findings/outcomes. Modified GRADE and CERQual  
29  
30 tools will be applied to assess the strength of evidence at the level of each finding/outcome. The  
31  
32 output of our umbrella review will consist of Summary of Findings tables and Evidence Profile  
33  
34 tables. A narrative meta-level synthesis will be provided. We will use the Clinical Adoption  
35  
36 Meta-Model as an organizing framework.  
37  
38  
39  
40

## 41 42 Ethics and Dissemination

43  
44 As an outcome of this review, we will create a guidance and roadmap to be used in a future  
45  
46 Delphi study to gather feedback from Canadian eHealth stakeholders. We will also present at  
47  
48 conferences and publish the final report. The umbrella review does not require ethical approval.

49  
50 PROSPERO registration number CRD42018096657

## 51 52 53 54 **Article Summary**

### Strengths and limitations of this study

- Through the application of GRADE and CERQual, this work provides an evaluation of the strength of the quantitative evidence and confidence in the qualitative evidence
- We apply Sandelowski et al.'s conception of logic (i.e., aggregation and configuration) underlying included reviews as an early step in umbrella reviews, to determine the approach to data analysis and synthesis that preserves the integrity of findings reported in included reviews
- Our umbrella review offers a recommended, but seldom-used approach to managing overlaps in included reviews underpinned by the logic of aggregation, namely, elimination of duplicates at the level of primary studies
- While selected elements of the JBI Umbrella Review method will be used, we are not adhering to this method as a whole. Our methodological modifications of the JBI approach include: a) extracting data at *the level of primary studies* as reported within reviews underpinned by the logic of aggregation; and b) using CERQual tool developed by the Cochrane GRADE group
- Only systematic reviews published in English will be included

### INTRODUCTION

During the past two decades, many western countries have introduced eHealth strategies and programs to support patients through a variety of electronic health technologies such as the patient portal.[1-3] For example, the Patient Portals & e-Views project funded by Canada Health Infoway was designed at the jurisdictional level to enable patients to assume an active role in their own health.[4] In England, the National Health Service Patient Online program allows patients to securely communicate with their health providers, schedule appointments, and view

1  
2  
3 their GP record.[2] The US Office of National Coordinator for Health Information Technology  
4 has introduced the Patient Engagement Playbook as a web-based resource guide for health care  
5 providers and administrators to engage patients in their health and care through such  
6 technologies as patient portals linked to an electronic health record.[5]  
7  
8  
9  
10  
11

12 Patient portal is a secure interface that provides patients with 24-hour online access to  
13 their personal health information such as recent doctor visits, discharge summaries, medications,  
14 allergies, immunizations, and lab results.[6,7] Some portals also enable patients to communicate  
15 with their care providers through secure email/text messaging as well as to schedule  
16 appointments and request medication refills online. Patient portals, also known as tethered  
17 personal health records, are maintained by healthcare organizations.  
18  
19  
20  
21  
22  
23  
24  
25

26 Organizations responsible for consumer-focused eHealth technologies tout the benefits of  
27 patient portals including improved communication with care providers, better access to health  
28 information and services, higher satisfaction level and quality of care, and increased motivation  
29 and confidence in managing one's health.[4,5,8] For example, results from a patient survey  
30 ( $n=1000$ ) during a six-month Canadian pilot project on the implementation of the "Citizen  
31 Health Information Portal," suggested improved patient care and provider-patient  
32 relationships.[9] Similarly, empirical studies have identified the benefits of patient portals.[10-  
33 15] However, other studies cautioned about barriers to the use of patient portals among different  
34 user groups. Factors influencing utilization of portals among patients include health literacy,  
35 technological proficiency, educational level, and socioeconomic status.[16-18] Provider-specific  
36 factors include concerns about workload and personal attitudes and perceptions influencing  
37 adoption of portals among health providers.[19] Despite these mixed responses, promised  
38  
39  
40  
41  
42  
43  
44  
45  
46  
47  
48  
49  
50  
51  
52  
53  
54  
55  
56  
57  
58  
59  
60

1  
2  
3 benefits of portals such as an enhanced patient engagement and improved health outcomes seem  
4  
5 to generate growing interest in this technology among various stakeholders.  
6

7  
8         Alongside policy conducive to the implementation and uptake of eHealth such as the US  
9  
10 Meaningful Use legislation,[20] research on the introduction, use and impact of electronic patient  
11  
12 portals has been rapidly increasing. In addition to hundreds of original research articles, multiple  
13  
14 systematic reviews on patient portals have been published in the past decade. These reviews are  
15  
16 focused on diabetes care,[21] pediatric population,[22] impact,[23] patient and provider  
17  
18 attitudes,[19] facilitators and barriers,[24] and technical development.[25] Thus, the evidence on  
19  
20 patient portal is dispersed across many publications. Moreover, the empirical evidence on portals  
21  
22 is mixed. For instance, studies have reported varying results as to whether patient portals  
23  
24 utilization results in a decrease, increase, or no difference in the number of patient visits.[26-28]  
25  
26 These accumulating disparate findings have made it difficult for those involved with, or affected  
27  
28 by, patient portals to form a coherent view on the current state of evidence on the introduction,  
29  
30 use and effects of these technologies.  
31  
32  
33  
34

35  
36         With the volume of systematic reviews on eHealth technologies rapidly growing, a higher  
37  
38 or meta-level synthesis is required to make sense of the evidence from published reviews in a  
39  
40 given domain such as patient portals. The need for a systematic review of reviews on the topic of  
41  
42 patient portal is confirmed by our preliminary literature search, which identified one meta-level  
43  
44 review explicitly referring to patient portals.[29] However, this integrative review by Jilka et  
45  
46 al.[29] is based on ten reviews published prior to 2015 and specifically focused on patient-  
47  
48 accessible electronic health records among adult populations. Thus, reviews on patient portals  
49  
50 were a subset of articles on patient access to electronic record. In light of these limitations, there  
51  
52 is a necessity for a current and more comprehensive systematic review of reviews addressing the  
53  
54  
55  
56  
57  
58  
59  
60

1  
2  
3 increasing utilization of patient portals. To address this knowledge gap, we will conduct an  
4  
5 umbrella review synthesizing present-day evidence on patient portals.  
6

7  
8 Our decision for selecting an umbrella review approach for this systematic review of  
9  
10 reviews was made following a scan of published higher-level reviews and relevant  
11  
12 methodological literature.[30,31] The literature scan revealed a disunity of terminology for  
13  
14 labeling higher-level reviews: umbrella review, overview, meta-review, review of systematic  
15  
16 reviews, review of reviews, and so on. *Meta-review* label is often applied to systematic reviews  
17  
18 (SRs) of published meta-analyses, or reviews that employ statistical analyses of data pooled from  
19  
20 randomized controlled trials (RCTs) or observational intervention studies; meta-reviews  
21  
22 themselves may or may not employ statistical analyses.[e.g., 32-35] *Reviews of SRs* and  
23  
24 *overviews of reviews* tend to focus on quantitative SRs not exclusive to meta-analyses of RCTs.  
25  
26 Some authors reserve the term *overviews* for syntheses of Cochrane SRs only.[36] In contrast,  
27  
28 *umbrella reviews* and *reviews of reviews* are usually more inclusive of different types of SRs. In  
29  
30 particular, umbrella review “focuses on broad condition or problem for which there are  
31  
32 competing interventions and highlights reviews that address these interventions and their results”  
33  
34 [37, p. 95] to integrate evidence from multiple SRs based on primary studies of various designs  
35  
36 into one handy document.[38] In fact, the Joanna Briggs Institute (JBI) claims that their umbrella  
37  
38 review methodology is “the first to consider reviews that report other than quantitative  
39  
40 evidence.”[39, p. 132] Our review will include reviews of quantitative, qualitative, and mixed-  
41  
42 method primary studies, and thus the JBI approach to umbrella reviews offers a useful  
43  
44 guidance.[40] However, we adopt selected elements of this approach while modifying other  
45  
46 elements of the JBI method. Our methodological decisions are explained below.  
47  
48  
49  
50  
51  
52  
53  
54  
55  
56  
57  
58  
59  
60

1  
2  
3 We anticipate that our substantive and methodological contribution will be manifold.  
4  
5 This umbrella review will consolidate aspects of the current state of knowledge about patient  
6 portals. Given the rapidly rising volume of systematic review literature to date, the umbrella  
7 review method is the next logical step to synthesize the review literature on portals in a more  
8 timely and efficient manner. Moreover, we aim to apply a novel approach to appraising  
9 quantitative evidence that supplements GRADE criteria modified by the Evidence-Based  
10 Practice Centers Program[41,42] with a vote count (described below). Further, we demonstrate  
11 the usefulness of Sandelowski et al.'s[43] conception of the logic of aggregation or configuration  
12 underpinning included reviews (addressed in more detail below). Next, we offer an approach to  
13 managing overlaps in reviews by eliminating duplicates at the level of primary studies. Further,  
14 as far as we know, our application of CERQual criteria[44] to evaluate qualitative evidence will  
15 be the first attempt to use this tool in the context of umbrella reviews. Additionally, the  
16 application of GRADE and CERQual to rate the quality of eHealth evidence will contribute to  
17 the health informatics discipline in terms of both growing the evidence base and providing  
18 guidance on evidence review methods.

## 37 **REVIEW METHODOLOGY**

38  
39  
40 Umbrella reviews, or overviews of reviews of qualitative, quantitative and mixed-method  
41 studies is a growing genre in health sciences,[36,45] and several protocols have been recently  
42 published.[46-48] In 2016, Pollock et al.[49] identified as many as 52 guidance documents  
43 produced by 19 research groups on how to conduct overviews of reviews. The most consistent  
44 recommendations are that umbrella reviews include published systematic reviews with the aim to  
45 synthesize findings from included reviews; that these systematic reviews are retrieved through  
46 comprehensive searches using more than one databases; and that the methodological quality of  
47  
48  
49  
50  
51  
52  
53  
54  
55  
56  
57  
58  
59  
60

1  
2  
3 reviews is assessed. The most consistent challenge that these guidance documents point out is  
4 that overviews are limited by the methods, reporting, and coverage of their included systematic  
5 reviews. Further, Pollock et al.[49] found that the guidance documents present limited and  
6 inconsistent recommendations in respect to procedures for evaluating confidence in evidence,  
7 managing overlap among reviews, and analyzing and synthesizing data from systematic reviews  
8 that include primary studies of various designs. Moreover, Pollock et al.[49] indicated that the  
9 guidance documents do not address several important logistical challenges (e.g., the extent of  
10 turning to primary studies vs. remaining at the level of included systematic reviews). Indeed, this  
11 diversity or absence of guidance is reflected in the methodological variation observed in recently  
12 published umbrella reviews.[50-52]  
13  
14  
15  
16  
17  
18  
19  
20  
21  
22  
23  
24  
25

26 Our survey of several published protocols for umbrella review identified a protocol by  
27 Rouleau et al.[47] that illustrates how researchers conducting a review of mixed-synthesis  
28 reviews grapple with some challenges listed above (e.g., evaluating quality of evidence,  
29 managing overlaps, synthesizing data from mixed-synthesis reviews). Rouleau et al.'s  
30 protocol[47] is also distinct for its recognition of a) the element of emergence in umbrella  
31 reviews (i.e., an open-ended nature of the data extraction process that makes it counterproductive  
32 to pre-select all phenomena of interest at the outset), and b) the importance of both inductive and  
33 deductive analysis when using a pre-selected theoretical framework. We anticipate that these  
34 challenges and insights will be applicable for our work.  
35  
36  
37  
38  
39  
40  
41  
42  
43  
44  
45  
46

47 Our umbrella review will use a modified version of the JBI Umbrella Review  
48 methodology as defined earlier, and more details are provided below. This protocol adheres to  
49 the PRISMA-P guidelines[53] and has been registered in PROSPERO<sup>1</sup> (CRD42018096657).  
50  
51  
52  
53  
54

---

55  
56 <sup>1</sup> <http://www.crd.york.ac.uk/PROSPERO/>  
57  
58  
59  
60



## Objective and questions

The objective of this umbrella review is to summarize the aspects of the current state of evidence on patient portals reported in published systematic reviews. Based on this summary, our future step is to provide guidance and a roadmap for stakeholders involved with this eHealth technology, specifically in Canada. Our findings will be of interest not only to eHealth managers/directors, health providers, and researchers, but to patients and families affected by the introduction of patient portals. The questions addressed in this umbrella review are:

- (a) What are the characteristics of the patient portals being introduced and used in different settings?
- (b) What is the impact of patient portals on clinical outcomes of care?
- (c) What are the system-related, health provider-related, and patient-related factors that influence the introduction, use and impact of patient portals?

## Conceptual framework

We will use the Clinical Adoption Meta-Model (CAMM)[54] as a framework to organize and make sense of the umbrella review findings. The CAMM is a maturity model used to understand, describe and explain the introduction, use and effects of eHealth systems over time. It is a temporal model with five dimensions of availability, use, clinical/health behaviour, outcomes, and time. In this review, availability refers to the ability of users to access the patient portal. System use refers to user interaction and experience with the portal. Clinical/health behavior refers to changes in user behaviors from interacting with the portal. Outcomes refers to effects of portal use, which can be at the patient, provider, organization or population level. Time refers to the transition periods across the four dimensions.

## Modifications to the JBI umbrella review method

1  
2  
3 Umbrella review method is intended to provide an overall examination of a body of information  
4 that is available for a given topic.[40] We have adopted selected key features of the JBI approach  
5  
6 to umbrella reviews:  
7

- 8  
9  
10 (a) compiling evidence from multiple research syntheses that may be quantitative and/or  
11  
12 qualitative in nature;  
13  
14 (b) including reviews based on empirical studies rather than theoretical speculations or opinion  
15  
16 (even if the review itself is titled *theoretical* or *critical*);  
17  
18 (c) summarizing evidence from existing reviews without retrieving and reanalyzing primary  
19  
20 studies;  
21  
22 (d) publishing a protocol prior to conducting the umbrella review;  
23  
24 (e) including at least two researchers to conduct the umbrella review;  
25  
26 (f) using a standard JBI critical appraisal checklist to assess the methodological quality of the  
27  
28 included reviews;  
29  
30 (g) applying an established tool to assess the overall strength of the evidence; and  
31  
32 (h) presenting a summary of findings table and an evidence profile table.  
33  
34  
35  
36  
37

38 The following five features are unique to our review and constitute a modification of the  
39  
40 JBI approach to umbrella reviews. First, we will use Sandelowski et al.'s[43] classification of  
41  
42 reviews (i.e., the logic of aggregation or configuration underpinning systematic reviews<sup>2</sup>) as a  
43  
44 guidance for data analysis and synthesis (explained below). Second, although we will summarize  
45  
46 data from included reviews without retrieving and reanalyzing primary studies, our Excel data-

47  
48  
49  
50  
51  
52 \_\_\_\_\_  
53 <sup>2</sup> To prevent any possible confusion, we would like to emphasize that Sandelowski et al.'s ideas presented in this  
54 2012 article, differ from both her earlier conceptions of aggregation and the JBI's terminology used in the context  
55 of mixed-method reviews. Importantly, the logics of aggregation and configuration are not tied exclusively to any  
56 one side of the qualitative/quantitative binary. E.g., narrative qualitative meta-synthesis can be based on the logic  
57 of aggregation.  
58  
59  
60

1  
2  
3 extraction tables will list the primary studies referenced in each review that aggregates primary  
4 quantitative, qualitative, and/or mixed findings, as a support for relevant pieces of data. This step  
5 will enable us to reconcile the primary studies across the reviews to eliminate duplicates  
6 (described below). In addition, this step is a prerequisite for the application of GRADE and  
7 CERQual criteria at the level of individual outcome/finding. Third, we will apply both the  
8 GRADE criteria modified by the Evidence-Based Practice Centers Program[41,42] and vote  
9 counting[55] as ways to determine the strength of evidence synthesized from aggregative  
10 reviews that include quantitative primary studies. Fourth, we will apply the CERQual criteria to  
11 determine the confidence in the evidence synthesized from aggregative reviews that include  
12 qualitative primary studies. Fifth, we will apply the CAMM[54] to organize and make sense of  
13 the umbrella review findings.

14  
15 Our systematic review of reviews will reflect methodological recommendations outlined  
16 by Pollock et al.[30] and Smith et al.[31] Of note is that these recommendations reinforce those  
17 presented in the JBI approach to umbrella reviews.[39,40] Particular attention will be paid to  
18 what Pollock et al.[30] identified as eight methodological challenges affecting the quality of  
19 reviews of reviews: 1) overlap between reviews (studies appearing in more than one review); 2)  
20 outdated reviews; 3) “systematic reviews” that do not meet expected methodological standards;  
21 4) assessment of methodological quality of reviews; 5) quality of reporting within reviews; 6)  
22 applying GRADE; 7) potential for publication bias; and 8) summarising key findings in brief  
23 accessible format suitable for informing decision making. Each of these areas will be addressed  
24 either below or in the final review report, as appropriate.

## Search strategy

An academic librarian developed a search strategy and assisted with searchers. Two search terms, a) *patient portal* and b) *systematic reviews*, were used in combination and adapted according to the databases, MeSH terms and Boolean rules, and other library best practices to maximize the retrieval of relevant citations. For example, synonyms for patient portal included patient web portal and tethered personal health record. Multiple search terms for systematic reviews are listed in the following section. We searched multiple databases on April 20, 2018: Ovid MEDLINE, Embase, CINAHL Plus with Full Text, Web of Science Core Collection, Scopus, the Cochrane Database of Systematic Reviews, PROSPERO registry, the JBI Database of Systematic Reviews and Implementation Reports, and Proquest Dissertations & Theses. A MEDLINE search strategy is included as an online supplement.

A preliminary scan of retrieved citations (after eliminating duplicates) identified approximately 40 citations meeting inclusion criteria at a glance. We anticipate that after a rigorous application of the inclusion/exclusion criteria and a methodological quality appraisal, we will have a smaller, manageable number of reviews. A preliminary scan also revealed two other important features of systematic reviews candidates for inclusion in our umbrella review: 1) the majority of systematic reviews synthesize quantitative, qualitative, and/or mixed-method primary studies within each review; and 2) none of a few purely quantitative systematic reviews performs meta-analyses with statistical pooling of findings. Thus, systematic reviews candidates for inclusion all appear to synthesize their findings narratively.

We restricted our searches to reviews published since the year 1990 in English. Patient portals appeared in the 1990s, and the policy attention fueled their development and use in the 2000<sup>th</sup>. Incidentally, during this time, various kinds of systematic reviews and overviews of

1  
2  
3 systematic reviews started to flourish. In our preliminary searches, the bulk of retrieved citations  
4  
5 fell within the last decade. Due to the recent emergence of patient portals, the issue of outdated  
6  
7 reviews (i.e., Pollock et al.'s[30] challenge #2) will likely be irrelevant in our umbrella review.  
8  
9

10 We are planning to supplement the above searches by examining the reference lists of all  
11  
12 included reviews for additional studies. We will also search the first 100 citations in Google  
13  
14 Scholar for missed reviews. The searches will be re-run during an analysis stage to identify  
15  
16 reviews published since the initial search. In addition, at that time we will expand our search to  
17  
18 systematic reviews published in grey literature such as reports commissioned by governmental  
19  
20 agencies and non-governmental organizations, and retrieved from Google search.  
21  
22

### 23 **Inclusion criteria**

24  
25  
26 The overarching inclusion criterion is systematic reviews focused on patient portal as the topic.  
27  
28 The types of reviews may include systematic review, meta-analysis, narrative review, descriptive  
29  
30 review, qualitative review, theoretical review, realist review, critical review, literature review,  
31  
32 mixed methods reviews, qualitative evidence synthesis, review of reviews, overview, and  
33  
34 umbrella review.[37,38] To be included, these reviews must synthesize findings from empirical  
35  
36 studies (i.e., the review authors must indicate that their review synthesizes primary research  
37  
38 studies; if in included aggregative reviews we come across an occasional non-empirical primary  
39  
40 source or a SR, we will delete this primary source). Because scoping reviews tend to include  
41  
42 broader, non-empirical literature, they will be excluded. Inclusion will be limited to reviews  
43  
44 published in English since 1990.  
45  
46  
47  
48

49 We will use the PICOS/PICo framework to provide explicit criteria on the types of  
50  
51 population (P), intervention (I), comparison (C), outcome (O), study design (S) and context (Co)  
52  
53 for inclusion[56] as described below.  
54  
55  
56  
57  
58  
59  
60

- Population – patients regardless of demographic and disease characteristics, and also health providers, consumers, researchers, educators, policy and/or decision makers, and the public
- Intervention/exposure – patient portal; patient web portal; tethered personal health record
- Comparison – primary studies in included systematic reviews can be intervention vs. a non-exposed control group, pre vs. post, user vs. non-user, and single cohorts only, as well as qualitative designs not mentioning any comparison
- Outcome – any types of effects including attitudes/behaviors, utilization, facilitators and barriers, care processes, economic value, health outcomes or policies
- Study design – any types of systematic reviews summarizing empirical studies (e.g., meta-analysis, narrative review, descriptive review, qualitative review, theoretical review, realist review, critical review, literature review, mixed methods reviews, qualitative evidence synthesis, review of reviews, overview, and umbrella review). Reviews can include empirical primary studies of any design: experimental, quasi-experimental, cross-sectional surveys, mixed, and qualitative designs.
- Context – any organizational and practice settings in countries including but not limited to the US, UK, Canada, or Netherlands, except those locations explicitly labeled in systematic reviews as low- or medium-resource countries

### **Exclusion criteria**

- Reviews with multiple eHealth technologies where portal is just one of many technologies examined
- Reviews that include standalone (i.e., not tethered) personal health records controlled by patients (this topic will be addressed in a separate umbrella review)

- Reviews that explicitly identify in the title or abstract their focus on low- and medium-resource countries (this is a topic for a separate umbrella review)
- Reviews in languages other than English
- Reviews not based on primary empirical studies, e.g., scoping reviews
- Reviews that do not provide a complete list of included primary studies
- *Systematic* reviews that do not describe (at a minimum) the search strategy and explicit inclusion criteria. This inclusion/exclusion decision will happen at the stage of full-text screening or quality evaluation, and will address Pollock et al.'s<sup>3</sup> challenge #3.

### **Review selection**

Citations retrieved via searchers of electronic databases will be imported to Covidence<sup>3</sup>, a Cochrane-supported software designed for conducting systematic reviews. Two researchers will independently proceed through a series of steps: a) screening the titles and abstracts against the inclusion criteria; and b) screening the full-text articles that met the initial screening step, against the inclusion criteria. Excluded articles and the reasons for exclusion will be logged.

Discrepancies will be resolved by consensus between the two researchers and/or by a third researcher.

### **Methodological quality assessment**

Typically, the methodology for conducting review of reviews presupposes that the quality of included reviews rather than the quality of primary studies be assessed. The purpose of quality assessment is to assess methodological quality, risk of bias, and reporting quality.

As a preliminary scan of retrieved citations revealed, candidates for inclusion in our umbrella review are mostly mixed-syntheses reviews that narratively aggregate findings of

---

<sup>3</sup> <https://www.covidence.org/home>

1  
2  
3 quantitative, qualitative, and/or mixed-method primary studies within each review. To assess the  
4 quality of systematic reviews included after screening the full text, we will apply the JBI critical  
5 appraisal checklist for systematic reviews[40].  
6  
7

8  
9  
10 While several critical appraisal instruments exist[40, 57-61] and they are based on  
11 common principles, the JBI checklist is the only tool designed for evaluating both quantitative  
12 and qualitative reviews. There are 11 questions in the JBI checklist each with a possible response  
13 of Yes, No or Unclear. For example, Q5 asks “were the criteria for appraising studies  
14 appropriate?” and requires that the included review provided details of the appraisal in either the  
15 methods section, an appendix, or an online supplementary file. By tallying all Yes responses, a  
16 review can have a score range of 0 to 11, with 11 being the highest quality.  
17  
18  
19  
20  
21  
22  
23  
24  
25

26 We will develop a rubric explicating how to interpret each of the tool’s criteria for this  
27 specific review. In addition, we will determine the cut-off score for eliminating low quality  
28 reviews. Using the agreed-upon rubric, one researcher (FL) will assess the quality of all included  
29 reviews, whereas the second and third researchers (MA, OP) will each assess at least 30% of  
30 reviews selected randomly. Any discrepancies will be discussed by all three researchers and  
31 resolved by consensus.  
32  
33  
34  
35  
36  
37  
38  
39

40 Overall, our team’s approach to assessing methodological quality of reviews recognizes  
41 the issue of the absence of a universally-accepted quality assessment instrument and the ensuing  
42 attempts by reviewers to mitigate this challenge by acknowledging the subjective component in  
43 applying quality assessment tools[62] and by modifying existing tools.[63] By paying close  
44 attention to the process of quality assessment, we are aiming to address Pollock et al.’s[30]  
45 challenges #4 and #5.  
46  
47  
48  
49  
50  
51  
52

## 53 **PATIENT AND PUBLIC INVOLVEMENT**

54  
55  
56  
57  
58  
59  
60



1  
2  
3 Patients and public were not involved at this stage. Patient groups will be included in a future  
4  
5 Delphi study.  
6

### 7 8 **Data Analysis** 9

10 Prior to data extraction, we will separate included systematic reviews into distinctive groups  
11 based on design of primary studies comprising those reviews (i.e., purely quantitative, purely  
12 qualitative, or mixed synthesis). For the purely quantitative reviews, we will ascertain their  
13  
14 approaches to data synthesis, for instance, meta-analysis with statistical pooling of findings or  
15  
16 narrative synthesis. For qualitative and mixed-synthesis reviews, we anticipate some kind of  
17  
18 narrative synthesis reported by the authors of those reviews. As explained above, our preliminary  
19  
20 scan of reviews candidates for inclusion has shown that the majority of reviews are mixed  
21  
22 syntheses while a smaller number of reviews synthesize quantitative primary studies; and that all  
23  
24 reviews employ narrative synthesis. This grouping has implications for our subsequent analysis  
25  
26 and synthesis.  
27  
28  
29  
30  
31  
32

33 As the next analytical move, we will apply Sandelowski et al.'s[43] ideas about the type  
34 of logic—aggregation or configuration—that can underpin review syntheses (irrespective of the  
35 design of primary studies comprising those reviews). The logic of aggregation is evident when a  
36 review simply amasses findings of primary studies of various designs in an additive manner. In  
37 other words, aggregation is merging thematically-similar findings into a pooled summary.[43, p.  
38 323] In contrast, the logic of configuration is evident when a review develops a synthesis  
39 exceeding any specific findings of primary studies. In other words, configuration is meshing  
40 thematically-diverse findings into a theory or model.[43, p. 323] A significance of this move is  
41 that narrative aggregative syntheses can be disaggregated into the level of primary studies (for  
42 our Excel data-extraction tables) without detracting from the integrity of systematic review  
43  
44  
45  
46  
47  
48  
49  
50  
51  
52  
53  
54  
55  
56  
57  
58  
59  
60

1  
2  
3 findings. On the other hand, syntheses underpinned by the logic of configuration should not be  
4 pulled apart into their component findings, as this can detract from the integrity of a theory or  
5 model.[43, p. 323]  
6  
7

8  
9  
10 Based on the above groupings, we will determine what Excel data-extraction tables are  
11 necessary in our umbrella review. Examples of data-extraction tables are quantitative,  
12 qualitative, and/or mixed-synthesis. Narrative aggregative systematic reviews included in these  
13 tables will be analyzed at the level of primary studies. If necessary, we will separately extract  
14 any theories reported in reviews underpinned by the logic of configuration.  
15  
16  
17  
18  
19  
20

21 As mentioned earlier, this analytical process will enable us to achieve three important  
22 goals: 1) not to retrieve and reanalyze primary studies while at the same time tracking their  
23 findings; 2) to manage overlaps in reviews by removing duplicate primary studies from each  
24 table so that they do not contribute the same finding more than once; and 3) to apply GRADE  
25 and CERQual at the level of individual outcome/finding from the included reviews.  
26  
27  
28  
29  
30  
31

### 32 33 Eliminating duplicates

34  
35 Duplicates are identified as an important issue in umbrella reviews, and metrics for calculating  
36 the degree of an overlap have been suggested.[64] As described above, our approach to  
37 managing an overlap among included reviews is to filter out duplicate primary studies so that  
38 they only appear once. The goal of removing duplicates is “to preclude the double counting that  
39 overstates the evidence.”[64, p. 374]  
40  
41  
42  
43  
44  
45

46  
47 On the other hand, we will aim to avoid an overestimation of the degree of overlap.[64]  
48 This happens when different reviews include the same primary studies, but extract non-  
49 overlapping data from those primary studies. Our Excel data-extraction tables will list both the  
50 primary studies and the finding from these studies reported in reviews, so that we will only  
51  
52  
53  
54  
55  
56  
57  
58  
59  
60

1  
2  
3 eliminate fully overlapping findings originating from the same primary study and reported in  
4  
5 different reviews.  
6  
7

## 8 **Data extraction** 9

10 Excel data-extraction tables described above will be initially piloted by at least two reviewers.  
11  
12

13 Extracted information will include:  
14

- 15 A. Characteristics of included reviews: Review reference (author-year-country), Date of  
16 search (years that the review covers), Objective of review, Types of studies / designs  
17 included in review, Number of included studies, and Country of included studies  
18  
19 B. Setting focus of the review; Study population and participant demographics and baseline  
20 characteristics (Participants included in review; Number of participants included in  
21 review; Target condition being addressed in the review); Interventions included in review  
22 (a thorough description of the features of the patient portal); Comparisons included in  
23 review if applicable; Suggested mechanisms of interventions included in review;  
24 Outcomes included in review; Statistical data from quantitative studies reported in review  
25 such as Effect size, Confidence intervals, and Positive and negative predictive values if  
26 applicable; Themes from qualitative studies reported in review; Study limitations  
27 reported in review  
28  
29  
30  
31  
32  
33  
34  
35  
36  
37  
38  
39  
40  
41  
42

43 Items in group B will be extracted line by line from the reviews' Findings/Results sections and  
44 recorded in the relevant Excel tables by the primary studies from which these findings originate,  
45 as reported in the reviews. One researcher (FL) will extract all data independently. Two other  
46 researchers (MA, OP) will each crosscheck at least 30% of the extracted data against review  
47 articles. All three researchers will compare the outputs for consistency and resolve discrepancies  
48 through discussion.  
49  
50  
51  
52  
53  
54  
55  
56  
57  
58  
59  
60

## Data synthesis

If applicable, statistical meta-analysis and subgroup analysis will be performed depending on the homogeneity in the scope of the intervention, population, or outcomes, using the information provided in included reviews of RCTs and observational intervention studies.[65]

Within each data extraction table, data will be synthesized into descriptive themes, then analytical themes,[66] and then higher-order domains (or evidence findings), and the final Summary of Findings tables will be presented. We will use the Clinical Adoption Meta-Model as an organizing framework to narratively report the findings based on the temporal implementation stage of patient portal in health organizations. Within each implementation stage, a narrative can be structured around the type of evidence, selected population characteristics, and type of outcome.

One researcher (FL) will conduct the synthesis, which will be checked by the other two researchers (MA, OP). Discrepancies will be discussed to reach consensus among the three researchers.

## Rating the evidence

We will apply modified GRADE and CERQual tools to assess the strength of the quantitative evidence and the confidence in the qualitative evidence, respectively, at the level of each individual finding. The output of this process will be Evidence Profile tables.

For quantitative findings, we will apply the GRADE method to determine the strength of evidence for each outcome. The GRADE method will follow the updated Guidance from the US Evidence-Based Practice Centre[41] as used by Gibbons et al.[42] in their evidence review of consumer eHealth technology. Specifically, we will assign a score to each outcome according to the five domains: study limitations, directness, consistency, precision and reporting bias. Then,

1  
2  
3 an overall grade—high, moderate, low or insufficient—will be assigned to reflect the level of  
4 confidence that the estimated effect of the outcome is close to the true effect.[41] We will  
5 supplement the GRADE method with vote counting[55,67] to quantify the evidence for each  
6 outcome. This will be done by tallying the number of positive/neutral/negative results for each  
7 outcome based on the significant differences reported in the reviews. An outcome will be  
8 considered positive if at least 50% of the results are positive and statistically significant. While  
9 vote counting does not show the magnitude of effect, it can reveal the overall direction of the  
10 effect for a given outcome. We will also record the sample size of each primary study if  
11 mentioned in the reviews and use this information alongside the vote count to make sense of the  
12 outcome qualitatively.  
13  
14  
15  
16  
17  
18  
19  
20  
21  
22  
23  
24  
25

26 For qualitative findings, we will apply GRADE-CERQual criteria to determine the  
27 confidence in evidence for each outcome.[68-73] We will assign a score to each outcome  
28 according to the four domains: methodological limitations, coherence, relevance, and adequacy.  
29 Then, an overall grade—high, moderate, low, or very low confidence—will be assigned to  
30 reflect the level of confidence that the estimated effect of the outcome is close to the true  
31 effect.[68-73]  
32  
33  
34  
35  
36  
37  
38  
39

40 The steps of eliminating duplicates and rating the evidence aim to address Pollock et  
41 al.'s[30] challenges #1, #6 and #7.  
42  
43

## 44 **ETHICS AND DISSEMINATION**

45  
46 The umbrella review does not require approval of ethics boards.  
47  
48

### 49 **A future Delphi study**

50  
51 As an output of this review, we will create a guidance and roadmap to be used in a future Delphi  
52 study[74,75] to gather feedback from Canadian eHealth stakeholders (numbers and roles of  
53  
54  
55  
56  
57  
58  
59  
60

1  
2  
3 stakeholders to be decided). A guidance will consist of a set of suggested actions on how a  
4  
5 healthcare organization may achieve the optimal effects based on the evidence available and our  
6  
7 personal field experiences, when implementing a patient portal. A roadmap will visually  
8  
9 represent suggested actions based on CAMM[54] stages.  
10  
11

12 Our findings will be of interest not only to eHealth managers/directors, health providers,  
13  
14 and researchers, but also to patients and families affected by the introduction of patient portals.  
15  
16 We will also present at conferences and publish the final report in a peer reviewed, preferably  
17  
18 open access journal.  
19  
20  
21

## 22 REFERENCES

- 23  
24 1. Canada Health Infoway. *Consumer Health e-Services* [Internet]. Toronto: Infoway; n.d.  
25 Accessed on 2018 Mar 31. URL: [https://www.infoway-](https://www.infoway-inforoute.ca/en/solutions/consumer-e-services)  
26 [inforoute.ca/en/solutions/consumer-e-services](https://www.infoway-inforoute.ca/en/solutions/consumer-e-services)  
27
- 28  
29 2. National Health Service. *About Patient Online* [Internet]. England: NHS; n.d. Accessed  
30 on 2018 Mar 31. URL: <https://www.england.nhs.uk/patient-online/about-the-prog/>  
31
- 32  
33 3. Skipper J. *Individuals' Access to Their Own Health Information. ONC Policy Brief.*  
34 [Internet]. Washington DC: ONC; 2013 Jun 3 Accessed on 2018 Mar 31. URL:  
35 <https://www.healthit.gov/sites/default/files/pdf/individual-access-06-03-2012.pdf>  
36
- 37  
38 4. Canada Health Infoway. *Patient Portals & e-Views* [Internet]. Toronto: Infoway; n.d.  
39 Accessed on 2018 Mar 31. URL: [https://www.infoway-](https://www.infoway-inforoute.ca/en/solutions/consumer-e-services/patient-portals-and-e-views)  
40 [inforoute.ca/en/solutions/consumer-e-services/patient-portals-and-e-views](https://www.infoway-inforoute.ca/en/solutions/consumer-e-services/patient-portals-and-e-views)  
41
- 42  
43 5. Office of the National Coordinator for Health Information Technology. *Patient Access to*  
44 *Medical Records* [Internet]. Washington DC: ONC; 2018 Mar 21. Accessed on 2018 Mar  
45 31. URL: <https://www.healthit.gov/topic/patient-access-medical-records>  
46
- 47  
48 6. Office of the National Coordinator for Health Information Technology. *What is a Patient*  
49 *Portal?* [Internet]. Washington DC: ONC; 2017 Sep 29. Accessed on 2018 Mar 31. URL:  
50 <https://www.healthit.gov/faq/what-patient-portal>  
51
- 52  
53 7. Brookstone A. *Patient Portals and Personal Health Records* [Internet]. *Canadian EMR*;  
54 2012 Jun 7. Accessed on 2018 Apr 2. URL:  
55 [http://blog.canadianemr.ca/canadianemr/2012/06/patient-portals-and-personal-health-](http://blog.canadianemr.ca/canadianemr/2012/06/patient-portals-and-personal-health-records.html)  
56 [records.html](http://blog.canadianemr.ca/canadianemr/2012/06/patient-portals-and-personal-health-records.html)  
57  
58  
59  
60

- 1  
2  
3 8. National Health Service. *Patient Online: the Key Benefits* [Internet]. England: NHS; n.d. Accessed on 2018 Mar 31. URL: <https://www.england.nhs.uk/patient-online/learning-so-far/key-benefits>
- 4  
5  
6  
7  
8 9. eHealth Saskatchewan. *Citizen Health Information Portal: Personal Benefits of CHIP* [Internet]. SK: eHealth Saskatchewan; n.d. Accessed on 2018 Mar 31. URL: <https://www.ehealthsask.ca/citizen-engagement/CHIP/Pages/Personal-Benefits-of-CHIP.aspx>
- 9  
10  
11  
12  
13 10. Kipping S, Stuckey M, Hernandez A, et al. A web-based patient portal for mental health care: benefits evaluation. *J Med Internet Res* 2016;18(11),e294.
- 14  
15  
16  
17 11. Kelly MM, Hoonakker PLT, Dean SM. Using an inpatient portal to engage families in pediatric hospital care. *J Am Med Inform Assoc* 2017;24(1);153-161.
- 18  
19  
20  
21 12. Osborn CY, Mayberry LS, Wallston KA, et al. Understanding patient portal use: implications for medication management. *J Med Internet Res* 2013;15(7);e133.
- 22  
23  
24 13. Sarkar U, Lyles CR, Parker MM, et al. Use of the refill function through an online patient portal is associated with improved adherence to statins in an integrated health system. *Med Care* 2014;52(3);194-201.
- 25  
26  
27  
28 14. Urowitz S, Wiljer D, Dupak K, et al. Improving diabetes management with a patient portal: qualitative study of a diabetes self-management portal. *J Med Internet Res* 2012;14(6);e158.
- 29  
30  
31  
32 15. Wade-Vuturo AE, Mayberry LS, Osborn CY. Secure messaging and diabetes management: experiences and perspectives of patient portal users. *J Am Med Inform Assoc* 2013;20;519-525.
- 33  
34  
35  
36 16. Davis SE, Osborn CY, Kripalani S, et al. Health literacy, education levels, and patient portal usage during hospitalizations. *AMIA Annu Symp Proc* 2015;1871-1880.
- 37  
38  
39  
40 17. Gordon NP, Hornbrook MC Differences in access to and preferences for using patient portals and other eHealth technologies based on race, ethnicity, and age: A database and survey study of seniors in a large health plan. *J Med Internet Res* 2016;18(3);e50.
- 41  
42  
43  
44 18. Tieu L, Schillinger D, Sarkar U, et al. Online patient websites for electronic health record access among vulnerable populations: portals to nowhere? *J Am Med Inform Assoc* 2017;24(e1);e47-e54.
- 45  
46  
47  
48  
49 19. Kruse CS, Argueta DA, Lopez L, et al. Patient and provider attitudes toward the use of patient portals for the management of chronic diseases: a systematic review. *J Med Internet Res* 2015;17(2);e40.



20. Gold M, McLaughlin C. Assessing HITECH implementation and lessons: 5 years later. *Milbank Q* 2016;94(3);654-687.
21. Amante DJ, Hogan TP, Pagoto SL, et al. A systematic review of electronic portal usage among patients with diabetes. *Diabetes Technol Ther* 2014;16(11);1-10.
22. Bush RA, Connelly CD, Fuller M, et al. Implementation of the integrated electronic patient portal in the pediatric population: a systematic review. *Telemed J E Health* 2016;22(2). doi: 10.1089/tmj.2015.0033
23. Ammenwerth E, Schnell-Inderst P, Hoerbst A. The impact of electronic patient portals on patient care: a systematic review of controlled trials. *J Med Internet Res* 2013;14(6);e162.
24. Powell KR. Patient-perceived facilitators of and barriers to electronic portal use. *Comput Inform Nurs* 2017;35(11);565-573.
25. Otte-Trojel T, de Bont A, Rundall TG, et al. What do we know about developing patient portals? A systematic literature review. *J Am Med Inform Assoc* 2016;23(e1);e162-168.
26. Jones JB, Weiner JP, Shah NR, et al. The wired patient: Patterns of electronic patient portal use among patients with cardiac disease or diabetes. *J Med Internet Res* 2015;17(2);e42. doi:10.2196/jmir.3157
27. Kruse CS, Bolton K, Freriks G. The effect of patient portals on quality outcomes and its implications to meaningful use: A systematic review. *J Med Internet Res* 2015;17(2);e44.
28. Leveille SG, Mejilla R, Ngo L, et al. Do patients who access clinical information on patient internet portals have more primary care visits? *Med Care* 2016;54(1);17-23.
29. Jilka SR, Callahan R, Sevdalis N, et al. "Nothing about me without me": An interpretative review of patient accessible electronic health records. *J Med Internet Res* 2015;17(6);e161.
30. Pollock A, Campbell P, Brunton G, et al. Selecting and implementing overview methods: implications from five exemplar overviews. *Syst Rev* 2017;6;145.
31. Smith V, Devane D, Begley CM, et al. Methodology in conducting a systematic review of systematic reviews of healthcare interventions. *BMC Med Res Methodol* 2011;11;15.
32. Benbassat J, Taragin MI The effect of clinical interventions on hospital readmissions: a meta-review of published meta-analyses. *Isr J Health Policy Res* 2013;2;1.
33. Parke HL, Epiphaniou E, Pearce G, et al. Self-management support interventions for stroke survivors: A systematic meta-review. *PLoS ONE* 2015;10(7);e0131448.



- 1  
2  
3 34. Pinnock H, Parke HL, Panagioti M., et al. Systematic meta-review of supported self-  
4 management for asthma: a healthcare perspective. *BMC Med* 2017;15;64.  
5  
6  
7 35. Savard LA, Thompson DR, Clark AM A meta-review of evidence on heart failure disease  
8 management programs: the challenges of describing and synthesizing evidence on  
9 complex interventions. *Trials* 2011;12;194.  
10  
11 36. Hartling L, Chisholm A, Thomson D, et al. A descriptive analysis of overviews of  
12 reviews published between 2000 and 2011. *PLoS ONE* 2012;7;e49667.  
13  
14 37. Grant NK, Booth A. A typology of reviews: an analysis of 14 review types and  
15 associated methodologies. *Health Info Libr J* 2009;26;91-108.  
16  
17 38. Pare G, Trudel MC, Jaana M, et al. Synthesizing information systems knowledge: a  
18 typology of literature reviews. *Information & Management* 2015;52;183-199.  
19  
20 39. Aromataris E, Fernandez R, Godfrey CM, et al. Summarizing systematic reviews:  
21 methodological development, conduct and reporting of an umbrella review approach. *Int*  
22 *J Evid Based Healthc* 2015;13;132-140.  
23  
24 40. Aromataris E, Fernandez R, Godfrey C, et al. Chapter 10: Umbrella Reviews. In:  
25 Aromataris E, Munn Z (Editors). *Joanna Briggs Institute Reviewer's Manual*. [Internet].  
26 The Joanna Briggs Institute, 2017. Accessed on 2018 Apr 2. URL:  
27 <https://reviewersmanual.joannabriggs.org/>  
28  
29 41. Berkman ND, Lohr KN, Ansari MT, et al. Grading the strength of a body of evidence  
30 when assessing health care interventions: an EPC update. *J Clin Epidemiol*  
31 2015;68(11);1312-1324.  
32  
33 42. Gibbons MC, Wilson RF, Samal L, et al. Impact of Consumer Health Informatics  
34 Applications. Evidence Report/Technology Assessment No. 188. (Prepared by Johns  
35 Hopkins University Evidence-based Practice Center under contract No. HHS 290-2007-  
36 10061-I). AHRQ Publication No. 09(10)-E019. Rockville, MD. *Agency for Healthcare*  
37 *Research and Quality*. Oct 2009.  
38  
39 43. Sandelowski M, Voils CI, Leeman J, et al. Mapping the mixed methods–mixed research  
40 synthesis terrain. *J Mixed Methods Res* 2012;6(4);317–331.  
41  
42 44. Lewin S, Glenton C, Munthe-Kaas H, et al. Using qualitative evidence in decision  
43 making for health and social interventions: an approach to assess confidence in findings  
44 from qualitative evidence syntheses (GRADE-CERQual). *PLoS Med* 2015;12;e1001895.  
45  
46 45. Biondi-Zoccai G. (Ed.) *Umbrella Reviews: Evidence Synthesis with Overviews of*  
47 *Reviews and Meta-Epidemiologic Studies*. 2016; Springer International.  
48  
49  
50  
51  
52  
53  
54  
55  
56  
57  
58  
59

- 1  
2  
3  
4  
5  
6  
7  
8  
9  
10  
11  
12  
13  
14  
15  
16  
17  
18  
19  
20  
21  
22  
23  
24  
25  
26  
27  
28  
29  
30  
31  
32  
33  
34  
35  
36  
37  
38  
39  
40  
41  
42  
43  
44  
45  
46  
47  
48  
49  
50  
51  
52  
53  
54  
55  
56  
57  
58  
59  
60
46. Ocloo J, Garfield S, Dawson S, et al. Exploring the theory, barriers and enablers for patient and public involvement across health, social care and patient safety: a protocol for a systematic review of reviews. *BMJ Open* 2017;7:e018426. doi:10.1136/bmjopen-2017-018426
  47. Rouleau G, Gagnon M-P, Côté J, et al. Effects of e-learning in a continuing education context on nursing care: a review of systematic qualitative, quantitative and mixed studies reviews (protocol). *BMJ Open* 2017;7:e018441. doi:10.1136/bmjopen-2017-018441
  48. Thomson K, Bambra C, McNamara C, et al. The effects of public health policies on population health and health inequalities in European welfare states: protocol for an umbrella review. *Systematic Reviews* 2016;5:57.
  49. Pollock M, Fernandes RM, Becker LA, et al. What guidance is available for researchers conducting overviews of reviews of healthcare interventions? A scoping review and qualitative metasummary. *Systematic Reviews* 2016;5(1):190.
  50. Apostolo J, Cooke R, Bobrowicz-Campos E, et al. Predicting risk and outcomes for frail older adults: an umbrella review of frailty screening tools. *JBI Database of Systematic Reviews and Implementation Reports* 2017
  51. Rouleau G, Gagnon MP, Côté J, et al. Impact of information and communication technologies on nursing care: Results of an overview of systematic reviews. *J Med Internet Res* 2017;19(4):e122. doi: 10.2196/jmir.6686
  52. Wiechula R, Conroy T, Kitson AL, et al. Umbrella review of the evidence: what factors influence the caring relationship between a nurse and patient? *J Advanced Nurs* 2016;72(4):723–734. doi: 10.1111/jan.12862
  53. Shamseer L, Moher D, Clarke M, et al. Preferred reporting items for systematic review and meta-analysis protocols (PRISMA-P) 2015: elaboration and explanation. *BMJ* 2015;350:g7647. doi:10.1136/bmj.g7647
  54. Price M, Lau F. The clinical adoption meta-model: a temporal meta-model describing the clinical adoption of health information systems. *BMC Med Inform Decis Mak* 2014;14(43):1-10.
  55. Lau F, Kuziemski C, Price M, et al. A review of systematic reviews on health information system studies. *J Am Med Inform Assoc* 2010;17:637-645.
  56. Stern C, Jordan Z, & McArthur A. Developing the review question and inclusion criteria. *Am J Nurs* 2014;114(4):53-56.

- 1  
2  
3 57. Shea BJ, Grimshaw JM, Wells GA, et al. Development of AMSTAR: a measurement tool  
4 to assess the methodological quality of systematic reviews. *BMC Med Res Methodol*  
5 2007;7;10. doi:10.1186/1471-2288-7-10  
6  
7  
8 58. Shea BJ, Reeves BC, Wells G, et al. AMSTAR 2: a critical appraisal tool for systematic  
9 reviews that include randomised or non-randomised studies of healthcare interventions,  
10 or both. *BMJ* 2017;358;j4008.  
11  
12 59. Whiting P, Savovic J, Higgins JPT, et al. ROBIS: a new tool to assess risk of bias in  
13 systematic reviews. *J Clin Epidemiol* 2016;69;225-234.  
14  
15  
16 60. National Collaborating Centre for Methods and Tools. *Health Evidence™ Quality*  
17 *Assessment Tool*. Hamilton, ON: McMaster University. September, 2017. Accessed on  
18 2018 May 18. URL: <http://www.nccmt.ca/resources/search/275>.  
19  
20  
21 61. Tong A, Flemming K, McInnes E, et al. Enhancing transparency in reporting the  
22 synthesis of qualitative research: ENTREQ. *BMC Med Res Methodol* 2012;2;181.  
23 doi:10.1186/1471-2288-12-181  
24  
25 62. Murad MH, Mustafa R, Morgan R, et al. Rating the quality of evidence is by necessity a  
26 matter of judgment. *J Clin Epidemiol* 2016;74;237–238.  
27  
28 63. Pollock A, Brady MC, Farmer SE, et al. The purpose of rating quality of evidence differs  
29 in an overview, as compared to guidelines or recommendations. *J Clin Epidemiol*  
30 2016;74;238–240.  
31  
32  
33 64. Pieper D, Antoine S, Mathes T, et al. Systematic review finds overlapping reviews were  
34 not mentioned in every other overview. *J Clin Epidemiol* 2014;67;368-375.  
35  
36  
37 65. Shrier I, Boivin JF, Steele RJ, et al. Should meta-analyses of interventions include  
38 observational studies in addition to randomized controlled trials? A critical examination  
39 of underlying principles. *Am J Epidemiol* 2007;166(10);1203–1209.  
40  
41  
42 66. Thomas J, Harden A. Methods for the thematic synthesis of qualitative research in  
43 systematic reviews. *BMC Med Res Methodol* 2008;8:45.  
44  
45 67. Garg AX, Adhikari NK, McDonald H, et al. Effects of computerized clinical decision  
46 support systems on practitioner performance and patient outcomes: a systematic review.  
47 *JAMA* 2005;293:1223e38.  
48  
49 68. Lewin S, Booth A, Glenton C, et al. Applying GRADE-CERQual to qualitative evidence  
50 synthesis findings: introduction to the series. *Implement Sci* 2018;13(Suppl 1):2. doi:  
51 10.1186/s13012-017-0688-3.  
52  
53  
54 69. Lewin S, Bohren M, Rashidian A, et al. Applying GRADE-CERQual to qualitative  
55 evidence synthesis findings—paper 2: how to make an overall CERQual assessment of  
56  
57  
58  
59

confidence and create a Summary of Qualitative Findings table. *Implement Sci* 2018;13(1);10.

70. Munthe-Kaas H, Bohren MA, Glenton C, et al. Applying GRADE-CERQual to qualitative evidence synthesis findings—paper 3: how to assess methodological limitations. *Implement Sci* 2018;13(1);9.
71. Colvin CJ, Garside R, Wainwright M, et al. Applying GRADE-CERQual to qualitative evidence synthesis findings—paper 4: how to assess coherence. *Implement Sci* 2018;13(1);13.
72. Glenton C, Carlsen B, Lewin S, et al. Applying GRADE-CERQual to qualitative evidence synthesis findings—paper 5: how to assess adequacy of data. *Implement Sci* 2018;13(1);14.
73. Noyes J, Booth A, Lewin S., et al. Applying GRADE-CERQual to qualitative evidence synthesis findings—paper 6: how to assess relevance of the data. *Implement Sci* 2018;13(1);4.
74. Logue MD, Efken JA Validating the personal health records adoption model using a modified e-Delphi. *J Adv Nurs* 2013;69(3);685-696.
75. McGinn CA, Gagnon MP, Shaw N, et al. Users' perspectives of key factors to implementing electronic health records in Canada: a Delphi study. *BMC Med Inform Decis Mak* 2012;12(105);1-13.

## AUTHORS' CONTRUBUTIONS

MA and FL developed the intellectual idea for the review. FL led the development of the major aspects of study design, methods and analysis. MA and OP provided suggestions on study methods. OP and MA developed approaches to dealing with qualitative and mixed-synthesis aspects. OP collaborated with a librarian to develop the search strategy and procured a Covidence© seat. OP and FL drafted the protocol and its various components. MA contributed to the intellectual development of the protocol, commenting on drafts. FL, MA, and OP all helped to resolve disagreement and reach consensus. OP revised the protocol with inputs from FL and MA.

## ACKNOWLEDGMENTS

1  
2  
3 We would like to acknowledge Ms. Linda Slater, a health care librarian at the University of  
4  
5 Alberta, Canada, for her able assistance with developing and pilot-testing comprehensive search  
6  
7 strategies. In addition, we are thankful to reviewers for their helpful feedback.  
8  
9

10 We would like to thank our reviewers, Drs. Edoardo Aromataris, Elske Ammenwerth, and Sara  
11  
12 Jackson, for their valuable comments that helped to strengthen the protocol.  
13

#### 14 **FUNDING STATEMENT**

15  
16 This research received no specific grant from any funding agency in the public, commercial or  
17  
18 not-for-profit sectors.  
19  
20

#### 21 **COMPETING INTERESTS STATEMENT**

22  
23 None  
24  
25  
26  
27  
28  
29  
30  
31  
32  
33  
34  
35  
36  
37  
38  
39  
40  
41  
42  
43  
44  
45  
46  
47  
48  
49  
50  
51  
52  
53  
54  
55  
56  
57  
58  
59  
60

**Synthesizing and Translating Evidence on Patient Portals:  
A Protocol for an Umbrella Review with Stakeholder Engagement**

Petrovskaya O,<sup>1</sup> Lau F,<sup>2</sup> Antonio M<sup>2</sup>

<sup>1</sup>University of Alberta, <sup>2</sup>University of Victoria

**Supplementary File  
MEDLINE Search Strategy**

**Ovid MEDLINE(R) Epub Ahead of Print, In-Process & Other Non-Indexed Citations, Ovid MEDLINE(R) Daily and Ovid MEDLINE(R) <1946 to Present>**

-----

1 patient portals/  
2 ((patient\* or consumer\*) adj2 portal\*).ti,ab,kf.  
3 (portal hypertension or portal vein\* or portal venous or ((proton or carbon) adj2 portal\*)).mp.  
4 2 not 3  
5 1 or 4  
6 (exp "Health Records, Personal"/ or "Patient Access to Records"/) and (electronic or online or internet or web or portal\* or tethered).mp.  
7 ((tethered adj3 record\*) or eclinician or mychart).ti,ab,kf.  
8 1 or 5 or 6 or 7  
9 meta-analysis.pt.  
10 (meta-anal\$ or metaanal\$).mp.  
11 ((quantitativ\$ adj3 review\$1) or (quantitativ\$ adj3 overview\$)).mp.  
12 ((systematic\$ adj3 review\$) or (systematic adj3 overview\$)).mp.  
13 ((methodologic adj3 review\$1) or (methodologic adj3 overview\$)).mp.  
14 (integrat\$ adj5 research).mp.  
15 (quantitativ\$ adj3 synthes\$).mp.  
16 ((qualitative\* adj3 (review\* or overview)) or (meta-synthes\* or metasyntes\*)).mp.  
17 or/9-16  
18 review.pt. or (review\$ or overview\$).mp.  
19 (medline or medlars or pubmed or index medicus or embase or cochrane).mp.  
20 (scisearch or web of science or psycinfo or psychinfo or cinahl or cinhal).mp.  
21 (excerpta medica or psychlit or psyclit or current contents or science citation index or sciences citation index or scopus).mp.

1  
2  
3 22 (hand search\$ or manual search\$).mp.  
4  
5 23 ((electronic adj3 database\$) or (bibliographic adj3 database\$) or periodical index\$).mp.  
6  
7 24 (pooling or pooled or mantel haenszel).mp.  
8  
9 25 (peto or der simonian or dersimonian or fixed effect\$).mp.  
10  
11 26 ((combine\$ or combining) adj5 (data or trial or trials or studies or study or result or results)).mp.  
12  
13 27 or/19-26  
14  
15 28 18 and 27  
16  
17 29 17 or 28  
18  
19 30 (hta\$ or health technology assessment\$ or biomedical technology assessment\$).mp.  
20  
21 31 technology assessment, biomedical/ or biomedical technology assessment/  
22  
23 32 30 or 31  
24  
25 33 29 or 32  
26  
27 34 8 and 33  
28  
29  
30  
31  
32  
33  
34  
35  
36  
37  
38  
39  
40  
41  
42  
43  
44  
45  
46  
47  
48  
49  
50  
51  
52  
53  
54  
55  
56  
57  
58  
59  
60

# Reporting checklist for protocol of a systematic review.

Based on the PRISMA-P guidelines.

## Instructions to authors

Complete this checklist by entering the page numbers from your manuscript where readers will find each of the items listed below.

Your article may not currently address all the items on the checklist. Please modify your text to include the missing information. If you are certain that an item does not apply, please write "n/a" and provide a short explanation.

Upload your completed checklist as an extra file when you submit to a journal.

In your methods section, say that you used the PRISMA-P reporting guidelines, and cite them as:

Moher D, Shamseer L, Clarke M, Ghersi D, Liberati A, Petticrew M, Shekelle P, Stewart LA. Preferred Reporting Items for Systematic Review and Meta-Analysis Protocols (PRISMA-P) 2015 statement. *Syst Rev.* 2015;4(1):1.

|                |     | Reporting Item                                                                                                                                                              | Page Number |
|----------------|-----|-----------------------------------------------------------------------------------------------------------------------------------------------------------------------------|-------------|
| Identification | #1a | Identify the report as a protocol of a systematic review                                                                                                                    | 1           |
| Update         | #1b | If the protocol is for an update of a previous systematic review, identify as such                                                                                          | n/a         |
|                | #2  | If registered, provide the name of the registry (such as PROSPERO) and registration number                                                                                  | 7           |
| Contact        | #3a | Provide name, institutional affiliation, e-mail address of all protocol authors; provide physical mailing address of corresponding author                                   | 1           |
| Contribution   | #3b | Describe contributions of protocol authors and identify the guarantor of the review                                                                                         | 24          |
|                | #4  | If the protocol represents an amendment of a previously completed or published protocol, identify as such and list changes; otherwise, state plan for documenting important | n/a         |



|    |                                         |      |                                                                                                                                                                                                                               |          |
|----|-----------------------------------------|------|-------------------------------------------------------------------------------------------------------------------------------------------------------------------------------------------------------------------------------|----------|
| 1  |                                         |      | protocol amendments                                                                                                                                                                                                           |          |
| 2  | Sources                                 | #5a  | Indicate sources of financial or other support for the review                                                                                                                                                                 | 24       |
| 3  |                                         |      |                                                                                                                                                                                                                               |          |
| 4  | Sponsor                                 | #5b  | Provide name for the review funder and / or sponsor                                                                                                                                                                           | n/a      |
| 5  |                                         |      |                                                                                                                                                                                                                               |          |
| 6  | Role of sponsor or funder               | #5c  | Describe roles of funder(s), sponsor(s), and / or institution(s), if any, in developing the protocol                                                                                                                          | n/a      |
| 7  |                                         |      |                                                                                                                                                                                                                               |          |
| 8  |                                         |      |                                                                                                                                                                                                                               |          |
| 9  |                                         |      |                                                                                                                                                                                                                               |          |
| 10 | Rationale                               | #6   | Describe the rationale for the review in the context of what is already known                                                                                                                                                 | 3,4,5    |
| 11 |                                         |      |                                                                                                                                                                                                                               |          |
| 12 |                                         |      |                                                                                                                                                                                                                               |          |
| 13 |                                         |      |                                                                                                                                                                                                                               |          |
| 14 | Objectives                              | #7   | Provide an explicit statement of the question(s) the review will address with reference to participants, interventions, comparators, and outcomes (PICO)                                                                      | 7,11     |
| 15 |                                         |      |                                                                                                                                                                                                                               |          |
| 16 |                                         |      |                                                                                                                                                                                                                               |          |
| 17 |                                         |      |                                                                                                                                                                                                                               |          |
| 18 |                                         |      |                                                                                                                                                                                                                               |          |
| 19 |                                         |      |                                                                                                                                                                                                                               |          |
| 20 | Eligibility criteria                    | #8   | Specify the study characteristics (such as PICO, study design, setting, time frame) and report characteristics (such as years considered, language, publication status) to be used as criteria for eligibility for the review | 10,11,12 |
| 21 |                                         |      |                                                                                                                                                                                                                               |          |
| 22 |                                         |      |                                                                                                                                                                                                                               |          |
| 23 |                                         |      |                                                                                                                                                                                                                               |          |
| 24 |                                         |      |                                                                                                                                                                                                                               |          |
| 25 |                                         |      |                                                                                                                                                                                                                               |          |
| 26 | Information sources                     | #9   | Describe all intended information sources (such as electronic databases, contact with study authors, trial registers or other grey literature sources) with planned dates of coverage                                         | 9,10     |
| 27 |                                         |      |                                                                                                                                                                                                                               |          |
| 28 |                                         |      |                                                                                                                                                                                                                               |          |
| 29 |                                         |      |                                                                                                                                                                                                                               |          |
| 30 |                                         |      |                                                                                                                                                                                                                               |          |
| 31 |                                         |      |                                                                                                                                                                                                                               |          |
| 32 | Search strategy                         | #10  | Present draft of search strategy to be used for at least one electronic database, including planned limits, such that it could be repeated                                                                                    | 10       |
| 33 |                                         |      |                                                                                                                                                                                                                               |          |
| 34 |                                         |      |                                                                                                                                                                                                                               |          |
| 35 |                                         |      |                                                                                                                                                                                                                               |          |
| 36 |                                         |      |                                                                                                                                                                                                                               |          |
| 37 | Study records - data management         | #11a | Describe the mechanism(s) that will be used to manage records and data throughout the review                                                                                                                                  | 12       |
| 38 |                                         |      |                                                                                                                                                                                                                               |          |
| 39 |                                         |      |                                                                                                                                                                                                                               |          |
| 40 |                                         |      |                                                                                                                                                                                                                               |          |
| 41 | Study records - selection process       | #11b | State the process that will be used for selecting studies (such as two independent reviewers) through each phase of the review (that is, screening, eligibility and inclusion in meta-analysis)                               | 12       |
| 42 |                                         |      |                                                                                                                                                                                                                               |          |
| 43 |                                         |      |                                                                                                                                                                                                                               |          |
| 44 |                                         |      |                                                                                                                                                                                                                               |          |
| 45 |                                         |      |                                                                                                                                                                                                                               |          |
| 46 |                                         |      |                                                                                                                                                                                                                               |          |
| 47 |                                         |      |                                                                                                                                                                                                                               |          |
| 48 | Study records - data collection process | #11c | Describe planned method of extracting data from reports (such as piloting forms, done independently, in duplicate), any processes for obtaining and confirming data from investigators                                        | 14,15    |
| 49 |                                         |      |                                                                                                                                                                                                                               |          |
| 50 |                                         |      |                                                                                                                                                                                                                               |          |
| 51 |                                         |      |                                                                                                                                                                                                                               |          |
| 52 |                                         |      |                                                                                                                                                                                                                               |          |
| 53 |                                         |      |                                                                                                                                                                                                                               |          |
| 54 |                                         |      |                                                                                                                                                                                                                               |          |
| 55 | Data items                              | #12  | List and define all variables for which data will be sought (such as PICO items, funding sources), any pre-planned data assumptions and simplifications                                                                       | 15       |
| 56 |                                         |      |                                                                                                                                                                                                                               |          |
| 57 |                                         |      |                                                                                                                                                                                                                               |          |
| 58 |                                         |      |                                                                                                                                                                                                                               |          |
| 59 |                                         |      |                                                                                                                                                                                                                               |          |
| 60 |                                         |      |                                                                                                                                                                                                                               |          |

|    |                    |      |                                                                                 |       |
|----|--------------------|------|---------------------------------------------------------------------------------|-------|
| 1  | Outcomes and       | #13  | List and define all outcomes for which data will be sought,                     | 15    |
| 2  | prioritization     |      | including prioritization of main and additional outcomes, with                  |       |
| 3  |                    |      | rationale                                                                       |       |
| 4  |                    |      |                                                                                 |       |
| 5  |                    |      |                                                                                 |       |
| 6  | Risk of bias in    | #14  | Describe anticipated methods for assessing risk of bias of                      | 13,14 |
| 7  | individual studies |      | individual studies, including whether this will be done at the                  |       |
| 8  |                    |      | outcome or study level, or both; state how this information will                |       |
| 9  |                    |      | be used in data synthesis                                                       |       |
| 10 |                    |      |                                                                                 |       |
| 11 |                    |      |                                                                                 |       |
| 12 |                    |      |                                                                                 |       |
| 13 | Data synthesis     | #15a | Describe criteria under which study data will be quantitatively                 | n/a   |
| 14 |                    |      | synthesised                                                                     |       |
| 15 |                    |      |                                                                                 |       |
| 16 |                    |      |                                                                                 |       |
| 17 |                    | #15b | If data are appropriate for quantitative synthesis, describe                    | n/a   |
| 18 |                    |      | planned summary measures, methods of handling data and                          |       |
| 19 |                    |      | methods of combining data from studies, including any                           |       |
| 20 |                    |      | planned exploration of consistency (such as I <sup>2</sup> , Kendall's $\tau$ ) |       |
| 21 |                    |      |                                                                                 |       |
| 22 |                    |      |                                                                                 |       |
| 23 |                    |      |                                                                                 |       |
| 24 |                    | #15c | Describe any proposed additional analyses (such as                              | n/a   |
| 25 |                    |      | sensitivity or subgroup analyses, meta-regression)                              |       |
| 26 |                    |      |                                                                                 |       |
| 27 |                    |      |                                                                                 |       |
| 28 |                    | #15d | If quantitative synthesis is not appropriate, describe the type                 | 15,16 |
| 29 |                    |      | of summary planned                                                              |       |
| 30 |                    |      |                                                                                 |       |
| 31 | Meta-bias(es)      | #16  | Specify any planned assessment of meta-bias(es) (such as                        | 16    |
| 32 |                    |      | publication bias across studies, selective reporting within                     |       |
| 33 |                    |      | studies)                                                                        |       |
| 34 |                    |      |                                                                                 |       |
| 35 |                    |      |                                                                                 |       |
| 36 |                    |      |                                                                                 |       |
| 37 | Confidence in      | #17  | Describe how the strength of the body of evidence will be                       | 16,17 |
| 38 | cumulative         |      | assessed (such as GRADE)                                                        |       |
| 39 | evidence           |      |                                                                                 |       |
| 40 |                    |      |                                                                                 |       |
| 41 |                    |      |                                                                                 |       |

42 The PRISMA-P checklist is distributed under the terms of the Creative Commons Attribution License  
 43 CC-BY 4.0. This checklist was completed on 27. May 2018 using <http://www.goodreports.org/>, a tool  
 44 made by the [EQUATOR Network](#) in collaboration with [Penelope.ai](#)  
 45  
 46  
 47  
 48  
 49  
 50  
 51  
 52  
 53  
 54  
 55  
 56  
 57  
 58  
 59  
 60

# BMJ Open

## Synthesizing Evidence on Patient Portals: A Protocol for an Umbrella Review

|                                 |                                                                                                                                                |
|---------------------------------|------------------------------------------------------------------------------------------------------------------------------------------------|
| Journal:                        | <i>BMJ Open</i>                                                                                                                                |
| Manuscript ID                   | bmjopen-2018-024469.R2                                                                                                                         |
| Article Type:                   | Protocol                                                                                                                                       |
| Date Submitted by the Author:   | 25-Jan-2019                                                                                                                                    |
| Complete List of Authors:       | Petrovskaya, Olga; University of Alberta, Faculty of Nursing<br>Lau, Francis; University of Victoria<br>Antonio, Marcy; University of Victoria |
| <b>Primary Subject Heading</b>: | Health informatics                                                                                                                             |
| Secondary Subject Heading:      | Evidence based practice                                                                                                                        |
| Keywords:                       | patient portal, tethered personal health record (PHR), umbrella review, systematic review of reviews, review evidence                          |
|                                 |                                                                                                                                                |

SCHOLARONE™  
Manuscripts

## Synthesizing Evidence on Patient Portals:

### A Protocol for an Umbrella Review

Petrovskaya O,<sup>1</sup> Lau F,<sup>2</sup> Antonio M<sup>2</sup>

<sup>1</sup>University of Alberta, <sup>2</sup>University of Victoria

(corresponding author) Olga Petrovskaya, Faculty of Nursing, University of Alberta, 5-260,  
ECHA 5 Fl., 11405-87 Ave. Edmonton, AB, Canada T6G 1C9, [olga.petrovskaya@ualberta.ca](mailto:olga.petrovskaya@ualberta.ca),  
1(780) 492 9903

Olga Petrovskaya and Francis Lau contributed equally to this paper.

Francis Lau, School of Health Information Science, University of Victoria, Victoria, Canada,  
[fylau@uvic.ca](mailto:fylau@uvic.ca)

Marcy Antonio, School of Health Information Science, University of Victoria, Victoria, Canada,  
[mantonio@uvic.ca](mailto:mantonio@uvic.ca)

Keywords: patient portal; tethered Personal Health Record (PHR); umbrella review; review  
evidence

Word count: 5092

## Abstract

### Introduction

Over the last two decades, patient portals have emerged as a noticeable eHealth strategy. To date, research on patient portals has been rapidly increasing. Our umbrella review aims to provide a meta-level synthesis to make sense of the evidence on patient portals from published systematic reviews.

### Methods

1  
2  
3 We will employ a modified version of the Joanna Briggs Institute (JBI) umbrella review method.

4  
5 The search strategy encompasses multiple databases. The inclusion criterion is specific to  
6  
7  
8 systematic reviews focused on patient portal.

9  
10 Patients or public were not involved in this work.

## 11 12 Analysis

13  
14 Two researchers will independently screen titles/abstracts and then full-text articles against the  
15  
16 inclusion/exclusion criteria. Methodological quality of included reviews will be assessed and  
17  
18 data will be extracted from the final selection of reviews. These reviews will be categorized into  
19  
20 quantitative, qualitative, and/or mixed-synthesis groups based on information about the design of  
21  
22 primary studies provided in the reviews. Correspondingly, we will create quantitative,  
23  
24 qualitative, and/or mixed-synthesis Excel data-extraction tables. Within each table, data will be  
25  
26 extracted with the reference to primary studies as reported in the reviews, and will be synthesized  
27  
28 into themes and then a smaller number of findings/outcomes. Modified GRADE and CERQual  
29  
30 tools will be applied to assess the strength of evidence at the level of each finding/outcome. The  
31  
32 output of our umbrella review will consist of Summary of Findings tables and Evidence Profile  
33  
34 tables. A narrative meta-level synthesis will be provided. We will use the Clinical Adoption  
35  
36 Meta-Model as an organizing framework.

## 37 38 39 40 41 42 43 Ethics and Dissemination

44  
45 As an outcome of this review, we will create a guidance and roadmap to be used in a future  
46  
47 Delphi study to gather feedback from Canadian eHealth stakeholders. We will also present at  
48  
49 conferences and publish the final report. The umbrella review does not require ethical approval.

50  
51 PROSPERO registration number CRD42018096657

## 52 53 54 **Article Summary**

### Strengths and limitations of this study

- Through the application of GRADE and CERQual, this work provides an evaluation of the strength of the quantitative evidence and confidence in the qualitative evidence
- We apply Sandelowski et al.'s conception of logic (i.e., aggregation and configuration) underlying included reviews as an early step in umbrella reviews, to determine the approach to data analysis and synthesis that preserves the integrity of findings reported in included reviews
- Our umbrella review offers a recommended, but seldom-used approach to managing overlaps in included reviews underpinned by the logic of aggregation, namely, elimination of duplicates at the level of primary studies
- While selected elements of the JBI Umbrella Review method will be used, we are not adhering to this method as a whole. Our methodological modifications of the JBI approach include: a) extracting data at *the level of primary studies* as reported within reviews underpinned by the logic of aggregation; and b) using CERQual tool developed by the Cochrane GRADE group
- Only systematic reviews published in English will be included

### INTRODUCTION

During the past two decades, many western countries have introduced eHealth strategies and programs to support patients through a variety of electronic health technologies such as the patient portal.[1-3] For example, the Patient Portals & e-Views project funded by Canada Health Infoway was designed at the jurisdictional level to enable patients to assume an active role in their own health.[4] In England, the National Health Service Patient Online program allows patients to securely communicate with their health providers, schedule appointments, and view

1  
2  
3 their GP record.[2] The US Office of National Coordinator for Health Information Technology  
4 has introduced the Patient Engagement Playbook as a web-based resource guide for health care  
5 providers and administrators to engage patients in their health and care through such  
6 technologies as patient portals linked to an electronic health record.[5]  
7  
8  
9  
10  
11

12 Patient portals are a secure interface that provide patients with 24-hour online access to  
13 their personal health information such as recent doctor visits, discharge summaries, medications,  
14 allergies, immunizations, and lab results.[6,7] Some portals also enable patients to communicate  
15 with their care providers through secure email/text messaging as well as to schedule  
16 appointments and request medication refills online. Patient portals, also known as tethered  
17 personal health records, are maintained by healthcare organizations.  
18  
19  
20  
21  
22  
23  
24  
25

26 Organizations responsible for consumer-focused eHealth technologies tout the benefits of  
27 patient portals including improved communication with care providers, better access to health  
28 information and services, higher satisfaction level and quality of care, and increased motivation  
29 and confidence in managing one's health.[4,5,8] For example, results from a patient survey  
30 ( $n=1000$ ) during a six-month Canadian pilot project on the implementation of the "Citizen  
31 Health Information Portal," suggested improved patient care and provider-patient  
32 relationships.[9] Similarly, empirical studies have identified the benefits of patient portals.[10-  
33 15] However, other studies cautioned about barriers to the use of patient portals among different  
34 user groups. Factors influencing utilization of portals among patients include health literacy,  
35 technological proficiency, educational level, and socioeconomic status.[16-18] Provider-specific  
36 factors include concerns about workload and personal attitudes and perceptions influencing  
37 adoption of portals among health providers.[19] Despite these mixed responses, promised  
38  
39  
40  
41  
42  
43  
44  
45  
46  
47  
48  
49  
50  
51  
52  
53  
54  
55  
56  
57  
58  
59  
60

1  
2  
3 benefits of portals such as an enhanced patient engagement and improved health outcomes seem  
4  
5 to generate growing interest in this technology among various stakeholders.  
6

7  
8         Alongside policy conducive to the implementation and uptake of eHealth such as the US  
9  
10 Meaningful Use legislation,[20] research on the introduction, use and impact of electronic patient  
11  
12 portals has been rapidly increasing. In addition to hundreds of original research articles, multiple  
13  
14 systematic reviews on patient portals have been published in the past decade. These reviews are  
15  
16 focused on diabetes care,[21] pediatric population,[22] impact,[23] patient and provider  
17  
18 attitudes,[19] facilitators and barriers,[24] and technical development.[25] Thus, the evidence on  
19  
20 patient portals is dispersed across many publications. Moreover, the empirical evidence on  
21  
22 portals is mixed. For instance, studies have reported varying results as to whether utilization of  
23  
24 patient portals results in a decrease, increase, or no difference in the number of patient visits.[26-  
25  
26 28] These accumulating disparate findings have made it difficult for those involved with, or  
27  
28 affected by, patient portals to form a coherent view on the current state of evidence on the  
29  
30 introduction, use and effects of these technologies.  
31  
32  
33  
34

35  
36         With the volume of systematic reviews on eHealth technologies rapidly growing, a higher  
37  
38 or meta-level synthesis is required to make sense of the evidence from published reviews in a  
39  
40 given domain such as patient portals. The need for a systematic review of reviews on the topic of  
41  
42 patient portals is confirmed by our preliminary literature search, which identified one meta-level  
43  
44 review explicitly referring to patient portals.[29] However, this integrative review by Jilka et  
45  
46 al.[29] is based on ten reviews published prior to 2015 and specifically focused on patient-  
47  
48 accessible electronic health records among adult populations. Thus, reviews on patient portals  
49  
50 were a subset of articles on patient access to electronic records. In light of these limitations, there  
51  
52 is a necessity for a current and more comprehensive systematic review of reviews addressing the  
53  
54  
55  
56  
57  
58  
59  
60



1  
2  
3 increasing utilization of patient portals. To address this knowledge gap, we will conduct an  
4  
5 umbrella review synthesizing present-day evidence on patient portals.  
6

7  
8 Our decision for selecting an umbrella review approach for this systematic review of  
9  
10 reviews was made following a scan of published higher-level reviews and relevant  
11  
12 methodological literature.[30,31] The literature scan revealed a disunity of terminology for  
13  
14 labeling higher-level reviews: umbrella review, overview, meta-review, review of systematic  
15  
16 reviews, review of reviews, and so on. *Meta-review* label is often applied to systematic reviews  
17  
18 (SRs) of published meta-analyses, or reviews that employ statistical analyses of data pooled from  
19  
20 randomized controlled trials (RCTs) or observational intervention studies; meta-reviews  
21  
22 themselves may or may not employ statistical analyses.[e.g., 32-35] *Reviews of SRs* and  
23  
24 *overviews of reviews* tend to focus on quantitative SRs not exclusive to meta-analyses of RCTs.  
25  
26 Some authors reserve the term *overviews* for syntheses of Cochrane SRs only.[36] In contrast,  
27  
28 *umbrella reviews* and *reviews of reviews* are usually more inclusive of different types of SRs. In  
29  
30 particular, an umbrella review “focuses on broad condition or problem for which there are  
31  
32 competing interventions and highlights reviews that address these interventions and their results”  
33  
34 [37, p. 95] to integrate evidence from multiple SRs based on primary studies of various designs  
35  
36 into one handy document.[38] In fact, the Joanna Briggs Institute (JBI) claims that their umbrella  
37  
38 review methodology is “the first to consider reviews that report other than quantitative  
39  
40 evidence.”[39, p. 132] Our review will include reviews of quantitative, qualitative, and mixed-  
41  
42 method primary studies, and thus the JBI approach to umbrella reviews offers a useful  
43  
44 guidance.[40] However, we adopt selected elements of this approach while modifying other  
45  
46 elements of the JBI method. Our methodological decisions are explained below.  
47  
48  
49  
50  
51  
52  
53  
54  
55  
56  
57  
58  
59  
60

1  
2  
3 We anticipate that our substantive and methodological contribution will be manifold.  
4  
5 This umbrella review will consolidate aspects of the current state of knowledge about patient  
6 portals. Given the rapidly rising volume of systematic review literature to date, the umbrella  
7 review method is the next logical step to synthesize the review literature on portals in a more  
8 timely and efficient manner. Moreover, we aim to apply a novel approach to appraising  
9 quantitative evidence that supplements GRADE criteria modified by the Evidence-Based  
10 Practice Centers Program[41,42] with a vote count (described below). Further, we demonstrate  
11 the usefulness of Sandelowski et al.'s[43] conception of the logic of aggregation or configuration  
12 underpinning included reviews (addressed in more detail below). Next, we offer an approach to  
13 managing overlaps in reviews by eliminating duplicates at the level of primary studies. Further,  
14 as far as we know, our application of CERQual criteria[44] to evaluate qualitative evidence will  
15 be the first attempt to use this tool in the context of umbrella reviews. Additionally, the  
16 application of GRADE and CERQual to rate the quality of eHealth evidence will contribute to  
17 the health informatics discipline in terms of both growing the evidence base and providing  
18 guidance on evidence review methods.

## 37 **REVIEW METHODOLOGY**

38  
39  
40 Umbrella reviews, or overviews of reviews of qualitative, quantitative and mixed-method  
41 studies is a growing genre in health sciences,[36,45] and several protocols have been recently  
42 published.[46-48] In 2016, Pollock et al.[49] identified as many as 52 guidance documents  
43 produced by 19 research groups on how to conduct overviews of reviews. The most consistent  
44 recommendations are that umbrella reviews include published systematic reviews with the aim to  
45 synthesize findings from included reviews; that these systematic reviews are retrieved through  
46 comprehensive searches using more than one database; and that the methodological quality of  
47  
48  
49  
50  
51  
52  
53  
54  
55  
56  
57  
58  
59  
60

1  
2  
3 reviews is assessed. The most consistent challenge that these guidance documents point out is  
4 that overviews are limited by the methods, reporting, and coverage of their included systematic  
5 reviews. Further, Pollock et al.[49] found that the guidance documents present limited and  
6 inconsistent recommendations in respect to procedures for evaluating confidence in evidence,  
7 managing overlap among reviews, and analyzing and synthesizing data from systematic reviews  
8 that include primary studies of various designs. Moreover, Pollock et al.[49] indicated that the  
9 guidance documents do not address several important logistical challenges (e.g., the extent of  
10 turning to primary studies vs. remaining at the level of included systematic reviews). Indeed, this  
11 diversity or absence of guidance is reflected in the methodological variation observed in recently  
12 published umbrella reviews.[50-52]  
13  
14  
15  
16  
17  
18  
19  
20  
21  
22  
23  
24  
25

26 Our survey of several published protocols for umbrella reviews identified a protocol by  
27 Rouleau et al.[47] that illustrates how researchers conducting a review of mixed-synthesis  
28 reviews grapple with some challenges listed above (e.g., evaluating quality of evidence,  
29 managing overlaps, synthesizing data from mixed-synthesis reviews). Rouleau et al.'s  
30 protocol[47] is also distinct for its recognition of a) the element of emergence in umbrella  
31 reviews (i.e., an open-ended nature of the data extraction process that makes it counterproductive  
32 to pre-select all phenomena of interest at the outset), and b) the importance of both inductive and  
33 deductive analysis when using a pre-selected theoretical framework. We anticipate that these  
34 challenges and insights will be applicable for our work.  
35  
36  
37  
38  
39  
40  
41  
42  
43  
44  
45  
46

47 Our umbrella review will use a modified version of the JBI Umbrella Review  
48 methodology as defined earlier, and more details are provided below. This protocol adheres to  
49 the PRISMA-P guidelines[53] and has been registered in PROSPERO<sup>1</sup> (CRD42018096657).  
50  
51  
52  
53  
54

---

55  
56 <sup>1</sup> <http://www.crd.york.ac.uk/PROSPERO/>  
57  
58  
59  
60

## Objective and questions

The objective of this umbrella review is to summarize the aspects of the current state of evidence on patient portals reported in published systematic reviews. Based on this summary, our future step is to provide guidance and a roadmap for stakeholders involved with this eHealth technology, specifically in Canada. Our findings will be of interest not only to eHealth managers/directors, health providers, and researchers, but to patients and families affected by the introduction of patient portals. The questions addressed in this umbrella review are:

- (a) What are the characteristics of the patient portals being introduced and used in different settings?
- (b) What is the impact of patient portals on clinical outcomes of care?
- (c) What are the system-related, health provider-related, and patient-related factors that influence the introduction, use and impact of patient portals?

## Conceptual framework

We will use the Clinical Adoption Meta-Model (CAMM)[54] as a framework to organize and make sense of the umbrella review findings. The CAMM is a maturity model used to understand, describe and explain the introduction, use and effects of eHealth systems over time. It is a temporal model with five dimensions of availability, use, clinical/health behaviour, outcomes, and time. In this review, availability refers to the ability of users to access the patient portal. System use refers to user interaction and experience with the portal. Clinical/health behavior refers to changes in user behaviors from interacting with the portal. Outcomes refers to effects of portal use, which can be at the patient, provider, organization or population level. Time refers to the transition periods across the four dimensions.

## Modifications to the JBI umbrella review method

1  
2  
3 Umbrella review method is intended to provide an overall examination of a body of information  
4 that is available for a given topic.[40] We have adopted selected key features of the JBI approach  
5  
6 to umbrella reviews:  
7

- 8  
9  
10 (a) compiling evidence from multiple research syntheses that may be quantitative and/or  
11  
12 qualitative in nature;  
13  
14 (b) including reviews based on empirical studies rather than theoretical speculations or opinion  
15  
16 (even if the review itself is titled *theoretical* or *critical*);  
17  
18 (c) summarizing evidence from existing reviews without retrieving and reanalyzing primary  
19  
20 studies;  
21  
22 (d) publishing a protocol prior to conducting the umbrella review;  
23  
24 (e) including at least two researchers to conduct the umbrella review;  
25  
26 (f) using a standard JBI critical appraisal checklist to assess the methodological quality of the  
27  
28 included reviews;  
29  
30 (g) applying an established tool to assess the overall strength of the evidence; and  
31  
32 (h) presenting a summary of findings table and an evidence profile table.  
33  
34  
35  
36  
37

38 The following five features are unique to our review and constitute a modification of the  
39  
40 JBI approach to umbrella reviews. First, we will use Sandelowski et al.'s[43] classification of  
41  
42 reviews (i.e., the logic of aggregation or configuration underpinning systematic reviews<sup>2</sup>) as a  
43  
44 guidance for data analysis and synthesis (explained below). Second, although we will summarize  
45  
46 data from included reviews without retrieving and reanalyzing primary studies, our Excel data-

47  
48  
49  
50  
51  
52 \_\_\_\_\_  
53 <sup>2</sup> To prevent any possible confusion, we would like to emphasize that Sandelowski et al.'s ideas presented in this  
54 2012 article, differ from both her earlier conceptions of aggregation and the JBI's terminology used in the context  
55 of mixed-method reviews. Importantly, the logics of aggregation and configuration are not tied exclusively to any  
56 one side of the qualitative/quantitative binary. E.g., narrative qualitative meta-synthesis can be based on the logic  
57 of aggregation.  
58  
59  
60

1  
2  
3 extraction tables will list the primary studies referenced in each review that aggregates primary  
4 quantitative, qualitative, and/or mixed findings, as a support for relevant pieces of data. This step  
5  
6 will enable us to reconcile the primary studies across the reviews to eliminate duplicates  
7  
8 (described below). In addition, this step is a prerequisite for the application of GRADE and  
9  
10 CERQual criteria at the level of individual outcome/finding. Third, we will apply both the  
11  
12 GRADE criteria modified by the Evidence-Based Practice Centers Program[41,42] and vote  
13  
14 counting[55] as ways to determine the strength of evidence synthesized from aggregative  
15  
16 reviews that include quantitative primary studies. Fourth, we will apply the CERQual criteria to  
17  
18 determine the confidence in the evidence synthesized from aggregative reviews that include  
19  
20 qualitative primary studies. Fifth, we will apply the CAMM[54] to organize and make sense of  
21  
22 the umbrella review findings.  
23  
24  
25  
26  
27

28 Our systematic review of reviews will reflect methodological recommendations outlined  
29  
30 by Pollock et al.[30] and Smith et al.[31] Of note is that these recommendations reinforce those  
31  
32 presented in the JBI approach to umbrella reviews.[39,40] Particular attention will be paid to  
33  
34 what Pollock et al.[30] identified as eight methodological challenges affecting the quality of  
35  
36 reviews of reviews: 1) overlap between reviews (studies appearing in more than one review); 2)  
37  
38 outdated reviews; 3) “systematic reviews” that do not meet expected methodological standards;  
39  
40 4) assessment of methodological quality of reviews; 5) quality of reporting within reviews; 6)  
41  
42 applying GRADE; 7) potential for publication bias; and 8) summarising key findings in brief  
43  
44 accessible format suitable for informing decision making. Each of these areas will be addressed  
45  
46 either below or in the final review report, as appropriate.  
47  
48  
49  
50

## 51 **Search strategy**

52  
53  
54  
55  
56  
57  
58  
59  
60

1  
2  
3 An academic librarian developed a search strategy and assisted with searches. Two search terms,  
4 a) *patient portal* and b) *systematic reviews*, were used in combination and adapted according to  
5 the databases, MeSH terms and Boolean rules, and other library best practices to maximize the  
6 retrieval of relevant citations. For example, synonyms for patient portal included patient web  
7 portal and tethered personal health record. Multiple search terms for systematic reviews are listed  
8 in the following section. We searched multiple databases on April 20, 2018: Ovid MEDLINE,  
9 Embase, CINAHL Plus with Full Text, Web of Science Core Collection, Scopus, the Cochrane  
10 Database of Systematic Reviews, PROSPERO registry, the JBI Database of Systematic Reviews  
11 and Implementation Reports, and Proquest Dissertations & Theses. A MEDLINE search strategy  
12 is included as an online supplement.  
13  
14  
15  
16  
17  
18  
19  
20  
21  
22  
23  
24  
25

26 A preliminary scan of retrieved citations (after eliminating duplicates) identified  
27 approximately 40 citations meeting inclusion criteria at a glance. We anticipate that after a  
28 rigorous application of the inclusion/exclusion criteria and a methodological quality appraisal,  
29 we will have a smaller, manageable number of reviews. A preliminary scan also revealed two  
30 other important features of systematic reviews candidates for inclusion in our umbrella review: 1)  
31 the majority of systematic reviews synthesize quantitative, qualitative, and/or mixed-method  
32 primary studies within each review; and 2) none of a few purely quantitative systematic reviews  
33 perform meta-analyses with statistical pooling of findings. Thus, systematic reviews candidates  
34 for inclusion all appear to synthesize their findings narratively.  
35  
36  
37  
38  
39  
40  
41  
42  
43  
44  
45  
46

47 We restricted our searches to reviews published since the year 1990 in English. Patient  
48 portals appeared in the 1990s, and the policy attention fueled their development and use in the  
49 2000s. Incidentally, during this time, various kinds of systematic reviews and overviews of  
50 systematic reviews started to flourish. In our preliminary searches, the bulk of retrieved citations  
51  
52  
53  
54  
55  
56  
57  
58  
59  
60

1  
2  
3 fell within the last decade. Due to the recent emergence of patient portals, the issue of outdated  
4 reviews (i.e., Pollock et al.'s[30] challenge #2) will likely be irrelevant in our umbrella review.  
5

6  
7 We are planning to supplement the above searches by examining the reference lists of all  
8 included reviews for additional studies. We will also search the first 100 citations in Google  
9  
10 Scholar for missed reviews. The searches will be re-run during an analysis stage to identify  
11  
12 reviews published since the initial search. In addition, at that time we will expand our search to  
13  
14 systematic reviews published in grey literature such as reports commissioned by governmental  
15  
16 agencies and non-governmental organizations, and retrieved from a Google search.  
17  
18  
19  
20

### 21 **Inclusion criteria**

22  
23 The overarching inclusion criterion is systematic reviews focused on patient portals as the topic.  
24  
25 The types of reviews may include systematic reviews, meta-analysis, narrative reviews,  
26  
27 descriptive reviews, qualitative reviews, theoretical reviews, realist reviews, critical reviews,  
28  
29 literature reviews, mixed methods reviews, qualitative evidence synthesis, review of reviews,  
30  
31 overviews, and umbrella reviews.[37,38] To be included, these reviews must synthesize findings  
32  
33 from empirical studies (i.e., the review authors must indicate that their review synthesizes  
34  
35 primary research studies; if in included aggregative reviews we come across an occasional non-  
36  
37 empirical primary source or a SR, we will delete this primary source). Because scoping reviews  
38  
39 tend to include broader, non-empirical literature, they will be excluded. Inclusion will be limited  
40  
41 to reviews published in English since 1990.  
42  
43  
44  
45

46  
47 We will use the PICOS/PICo framework to provide explicit criteria on the types of  
48  
49 population (P), intervention (I), comparison (C), outcome (O), study design (S) and context (Co)  
50  
51 for inclusion[56] as described below.  
52  
53  
54  
55  
56  
57  
58  
59  
60



- Population – patients regardless of demographic and disease characteristics, and also health providers, consumers, researchers, educators, policy and/or decision makers, and the public
- Intervention/exposure – patient portal; patient web portal; tethered personal health record
- Comparison – primary studies in included systematic reviews can be intervention vs. a non-exposed control group, pre vs. post, user vs. non-user, and single cohorts only, as well as qualitative designs not mentioning any comparison
- Outcome – any types of effects including attitudes/behaviors, utilization, facilitators and barriers, care processes, economic value, health outcomes or policies
- Study design – any types of systematic reviews summarizing empirical studies (e.g., meta-analysis, narrative review, descriptive review, qualitative review, theoretical review, realist review, critical review, literature review, mixed methods reviews, qualitative evidence synthesis, review of reviews, overview, and umbrella review). Reviews can include empirical primary studies of any design: experimental, quasi-experimental, cross-sectional surveys, mixed, and qualitative designs.
- Context – any organizational and practice settings in countries including but not limited to the US, UK, Canada, or Netherlands, except those locations explicitly labeled in systematic reviews as low- or medium-resource countries

### **Exclusion criteria**

- Reviews with multiple eHealth technologies where portals are just one of many technologies examined
- Reviews that include standalone (i.e., not tethered) personal health records controlled by patients (this topic will be addressed in a separate umbrella review)

- Reviews that explicitly identify in the title or abstract their focus on low- and medium-resource countries (this is a topic for a separate umbrella review)
- Reviews in languages other than English
- Reviews not based on primary empirical studies, e.g., scoping reviews
- Reviews that do not provide a complete list of included primary studies
- *Systematic* reviews that do not describe (at a minimum) the search strategy and explicit inclusion criteria. This inclusion/exclusion decision will happen at the stage of full-text screening or quality evaluation, and will address Pollock et al.'s<sup>3</sup> challenge #3.

### **Review selection**

Citations retrieved via searches of electronic databases will be imported to Covidence<sup>3</sup>, a Cochrane-supported software designed for conducting systematic reviews. Two researchers will independently proceed through a series of steps: a) screening the titles and abstracts against the inclusion criteria; and b) screening the full-text articles that met the initial screening step, against the inclusion criteria. Excluded articles and the reasons for exclusion will be logged.

Discrepancies will be resolved by consensus between the two researchers and/or by a third researcher.

### **Methodological quality assessment**

Typically, the methodology for conducting review of reviews presupposes that the quality of included reviews rather than the quality of primary studies be assessed. The purpose of quality assessment is to assess methodological quality, risk of bias, and reporting quality.

As a preliminary scan of retrieved citations revealed, candidates for inclusion in our umbrella review are mostly mixed-syntheses reviews that narratively aggregate findings of

---

<sup>3</sup> <https://www.covidence.org/home>

1  
2  
3 quantitative, qualitative, and/or mixed-method primary studies within each review. To assess the  
4 quality of systematic reviews included after screening the full text, we will apply the JBI critical  
5 appraisal checklist for systematic reviews[40].  
6  
7  
8

9  
10 While several critical appraisal instruments exist[40, 57-61] and they are based on  
11 common principles, the JBI checklist is the only tool designed for evaluating both quantitative  
12 and qualitative reviews. There are 11 questions in the JBI checklist each with a possible response  
13 of Yes, No or Unclear. For example, Q5 asks “were the criteria for appraising studies  
14 appropriate?” and requires that the included review provided details of the appraisal in either the  
15 methods section, an appendix, or an online supplementary file. By tallying all Yes responses, a  
16 review can have a score range of 0 to 11, with 11 being the highest quality.  
17  
18  
19  
20  
21  
22  
23  
24  
25

26 We will develop a rubric explicating how to interpret each of the tool’s criteria for this  
27 specific review. In addition, we will determine the cut-off score for eliminating low quality  
28 reviews. Using the agreed-upon rubric, one researcher (FL) will assess the quality of all included  
29 reviews, whereas the second and third researchers (MA, OP) will each assess at least 30% of  
30 reviews selected randomly. Any discrepancies will be discussed by all three researchers and  
31 resolved by consensus.  
32  
33  
34  
35  
36  
37  
38  
39

40 Overall, our team’s approach to assessing methodological quality of reviews recognizes  
41 the issue of the absence of a universally-accepted quality assessment instrument and the ensuing  
42 attempts by reviewers to mitigate this challenge by acknowledging the subjective component in  
43 applying quality assessment tools[62] and by modifying existing tools.[63] By paying close  
44 attention to the process of quality assessment, we are aiming to address Pollock et al.’s[30]  
45 challenges #4 and #5.  
46  
47  
48  
49  
50  
51  
52

## 53 **PATIENT AND PUBLIC INVOLVEMENT**

54  
55  
56  
57  
58  
59  
60

1  
2  
3 Patients and public were not involved at this stage. Patient groups will be included in a future  
4  
5 Delphi study.  
6

### 7 **Data Analysis**

8  
9  
10 Prior to data extraction, we will separate included systematic reviews into distinctive groups  
11  
12 based on design of primary studies comprising those reviews (i.e., purely quantitative, purely  
13  
14 qualitative, or mixed synthesis). For the purely quantitative reviews, we will ascertain their  
15  
16 approaches to data synthesis, for instance, meta-analysis with statistical pooling of findings or  
17  
18 narrative synthesis. For qualitative and mixed-synthesis reviews, we anticipate some kind of  
19  
20 narrative synthesis reported by the authors of those reviews. As explained above, our preliminary  
21  
22 scan of review papers that were candidates for inclusion has shown that the majority of reviews  
23  
24 are mixed syntheses while a smaller number of reviews synthesize quantitative primary studies;  
25  
26 and that all reviews employ narrative synthesis. This grouping has implications for our  
27  
28 subsequent analysis and synthesis.  
29  
30  
31  
32

33 As the next analytical move, we will apply Sandelowski et al.'s[43] ideas about the type  
34  
35 of logic—aggregation or configuration—that can underpin review syntheses (irrespective of the  
36  
37 design of primary studies comprising those reviews). The logic of aggregation is evident when a  
38  
39 review simply amasses findings of primary studies of various designs in an additive manner. In  
40  
41 other words, aggregation is merging thematically-similar findings into a pooled summary.[43, p.  
42  
43 323] In contrast, the logic of configuration is evident when a review develops a synthesis  
44  
45 exceeding any specific findings of primary studies. In other words, configuration is meshing  
46  
47 thematically-diverse findings into a theory or model.[43, p. 323] A significance of this move is  
48  
49 that narrative aggregative syntheses can be disaggregated into the level of primary studies (for  
50  
51 our Excel data-extraction tables) without detracting from the integrity of systematic review  
52  
53  
54  
55  
56  
57  
58  
59  
60

1  
2  
3 findings. On the other hand, syntheses underpinned by the logic of configuration should not be  
4 pulled apart into their component findings, as this can detract from the integrity of a theory or  
5 model.[43, p. 323]  
6  
7

8  
9  
10 Based on the above groupings, we will determine what Excel data-extraction tables are  
11 necessary in our umbrella review. Examples of data-extraction tables are quantitative,  
12 qualitative, and/or mixed-synthesis. Narrative aggregative systematic reviews included in these  
13 tables will be analyzed at the level of primary studies. If necessary, we will separately extract  
14 any theories reported in reviews underpinned by the logic of configuration.  
15  
16  
17  
18  
19  
20

21 As mentioned earlier, this analytical process will enable us to achieve three important  
22 goals: 1) not to retrieve and reanalyze primary studies while at the same time tracking their  
23 findings; 2) to manage overlaps in reviews by removing duplicate primary studies from each  
24 table so that they do not contribute the same finding more than once; and 3) to apply GRADE  
25 and CERQual at the level of individual outcome/finding from the included reviews.  
26  
27  
28  
29  
30  
31

### 32 **Eliminating duplicates**

33  
34 Duplicates are identified as an important issue in umbrella reviews, and metrics for calculating  
35 the degree of an overlap have been suggested.[64] As described above, our approach to  
36 managing an overlap among included reviews is to filter out duplicate primary studies so that  
37 they only appear once. The goal of removing duplicates is “to preclude the double counting that  
38 overstates the evidence.”[64, p. 374]  
39  
40  
41  
42  
43  
44  
45  
46

47 On the other hand, we will aim to avoid an overestimation of the degree of overlap.[64]  
48 This happens when different reviews include the same primary studies, but extract non-  
49 overlapping data from those primary studies. Our Excel data-extraction tables will list both the  
50 primary studies and the finding from these studies reported in reviews, so that we will only  
51  
52  
53  
54  
55  
56  
57  
58  
59  
60

1  
2  
3 eliminate fully overlapping findings originating from the same primary study and reported in  
4  
5 different reviews.  
6  
7

## 8 **Data extraction** 9

10 Excel data-extraction tables described above will be initially piloted by at least two reviewers.  
11  
12

13 Extracted information will include:  
14

- 15 A. Characteristics of included reviews: Review reference (author-year-country), Date of  
16 search (years that the review covers), Objective of review, Types of studies / designs  
17 included in review, Number of included studies, and Country of included studies  
18  
19 B. Setting focus of the review; Study population and participant demographics and baseline  
20 characteristics (Participants included in review; Number of participants included in  
21 review; Target condition being addressed in the review); Interventions included in review  
22 (a thorough description of the features of the patient portal); Comparisons included in  
23 review if applicable; Suggested mechanisms of interventions included in review;  
24 Outcomes included in review; Statistical data from quantitative studies reported in review  
25 such as Effect size, Confidence intervals, and Positive and negative predictive values if  
26 applicable; Themes from qualitative studies reported in review; Study limitations  
27 reported in review  
28  
29  
30  
31  
32  
33  
34  
35  
36  
37  
38  
39  
40  
41  
42

43 Items in group B will be extracted line by line from the reviews' Findings/Results sections and  
44 recorded in the relevant Excel tables by the primary studies from which these findings originate,  
45 as reported in the reviews. One researcher (FL) will extract all data independently. Two other  
46 researchers (MA, OP) will each crosscheck at least 30% of the extracted data against review  
47 articles. All three researchers will compare the outputs for consistency and resolve discrepancies  
48 through discussion.  
49  
50  
51  
52  
53  
54  
55  
56  
57  
58  
59  
60

## Data synthesis

If applicable, statistical meta-analysis and subgroup analysis will be performed depending on the homogeneity in the scope of the intervention, population, or outcomes, using the information provided in included reviews of RCTs and observational intervention studies.[65]

Within each data extraction table, data will be synthesized into descriptive themes, then analytical themes,[66] and then higher-order domains (or evidence findings), and the final Summary of Findings tables will be presented. We will use the Clinical Adoption Meta-Model as an organizing framework to narratively report the findings based on the temporal implementation stage of patient portal in health organizations. Within each implementation stage, a narrative can be structured around the type of evidence, selected population characteristics, and type of outcome.

One researcher (FL) will conduct the synthesis, which will be checked by the other two researchers (MA, OP). Discrepancies will be discussed to reach consensus among the three researchers.

## Rating the evidence

We will apply modified GRADE and CERQual tools to assess the strength of the quantitative evidence and the confidence in the qualitative evidence, respectively, at the level of each individual finding. The output of this process will be Evidence Profile tables.

For quantitative findings, we will apply the GRADE method to determine the strength of evidence for each outcome. The GRADE method will follow the updated Guidance from the US Evidence-Based Practice Centre[41] as used by Gibbons et al.[42] in their evidence review of consumer eHealth technology. Specifically, we will assign a score to each outcome according to the five domains: study limitations, directness, consistency, precision and reporting bias. Then,

1  
2  
3 an overall grade—high, moderate, low or insufficient—will be assigned to reflect the level of  
4 confidence that the estimated effect of the outcome is close to the true effect.[41] We will  
5 supplement the GRADE method with vote counting[55,67] to quantify the evidence for each  
6 outcome. This will be done by tallying the number of positive/neutral/negative results for each  
7 outcome based on the significant differences reported in the reviews. An outcome will be  
8 considered positive if at least 50% of the results are positive and statistically significant. While  
9 vote counting does not show the magnitude of effect, it can reveal the overall direction of the  
10 effect for a given outcome. We will also record the sample size of each primary study if  
11 mentioned in the reviews and use this information alongside the vote count to make sense of the  
12 outcome qualitatively.  
13  
14  
15  
16  
17  
18  
19  
20  
21  
22  
23  
24  
25

26 For qualitative findings, we will apply GRADE-CERQual criteria to determine the  
27 confidence in evidence for each outcome.[68-73] We will assign a score to each outcome  
28 according to the four domains: methodological limitations, coherence, relevance, and adequacy.  
29 Then, an overall grade—high, moderate, low, or very low confidence—will be assigned to  
30 reflect the level of confidence that the estimated effect of the outcome is close to the true  
31 effect.[68-73]  
32  
33  
34  
35  
36  
37  
38  
39

40 The steps of eliminating duplicates and rating the evidence aim to address Pollock et  
41 al.'s[30] challenges #1, #6 and #7.  
42  
43

## 44 **ETHICS AND DISSEMINATION**

45 The umbrella review does not require approval of ethics boards.  
46  
47

### 48 **A future Delphi study**

49 As an output of this review, we will create a guidance and roadmap to be used in a future Delphi  
50 study[74,75] to gather feedback from Canadian eHealth stakeholders (number and roles of  
51  
52  
53  
54  
55  
56  
57  
58  
59  
60



1  
2  
3 stakeholders to be decided). A guidance will consist of a set of suggested actions on how a  
4  
5 healthcare organization may achieve the optimal effects based on the evidence available and our  
6  
7 personal field experiences, when implementing a patient portal. A roadmap will visually  
8  
9 represent suggested actions based on CAMM[54] stages.  
10  
11

12 Our findings will be of interest not only to eHealth managers/directors, health providers,  
13  
14 and researchers, but also to patients and families affected by the introduction of patient portals.  
15  
16 We will also present at conferences and publish the final report in a peer reviewed, preferably  
17  
18 open access journal.  
19  
20

## 21 REFERENCES

- 22 1. Canada Health Infoway. *Consumer Health e-Services* [Internet]. Toronto: Infoway; n.d.  
23 Accessed on 2018 Mar 31. URL: [https://www.infoway-](https://www.infoway-inforoute.ca/en/solutions/consumer-e-services)  
24 [inforoute.ca/en/solutions/consumer-e-services](https://www.infoway-inforoute.ca/en/solutions/consumer-e-services)  
25
- 26 2. National Health Service. *About Patient Online* [Internet]. England: NHS; n.d. Accessed  
27 on 2018 Mar 31. URL: <https://www.england.nhs.uk/patient-online/about-the-prog/>  
28
- 29 3. Skipper J. *Individuals' Access to Their Own Health Information. ONC Policy Brief.*  
30 [Internet]. Washington DC: ONC; 2013 Jun 3 Accessed on 2018 Mar 31. URL:  
31 <https://www.healthit.gov/sites/default/files/pdf/individual-access-06-03-2012.pdf>  
32
- 33 4. Canada Health Infoway. *Patient Portals & e-Views* [Internet]. Toronto: Infoway; n.d.  
34 Accessed on 2018 Mar 31. URL: [https://www.infoway-](https://www.infoway-inforoute.ca/en/solutions/consumer-e-services/patient-portals-and-e-views)  
35 [inforoute.ca/en/solutions/consumer-e-services/patient-portals-and-e-views](https://www.infoway-inforoute.ca/en/solutions/consumer-e-services/patient-portals-and-e-views)  
36
- 37 5. Office of the National Coordinator for Health Information Technology. *Patient Access to*  
38 *Medical Records* [Internet]. Washington DC: ONC; 2018 Mar 21. Accessed on 2018 Mar  
39 31. URL: <https://www.healthit.gov/topic/patient-access-medical-records>  
40
- 41 6. Office of the National Coordinator for Health Information Technology. *What is a Patient*  
42 *Portal?* [Internet]. Washington DC: ONC; 2017 Sep 29. Accessed on 2018 Mar 31. URL:  
43 <https://www.healthit.gov/faq/what-patient-portal>  
44
- 45 7. Brookstone A. *Patient Portals and Personal Health Records* [Internet]. *Canadian EMR*;  
46 2012 Jun 7. Accessed on 2018 Apr 2. URL:  
47 [http://blog.canadianemr.ca/canadianemr/2012/06/patient-portals-and-personal-health-](http://blog.canadianemr.ca/canadianemr/2012/06/patient-portals-and-personal-health-records.html)  
48 [records.html](http://blog.canadianemr.ca/canadianemr/2012/06/patient-portals-and-personal-health-records.html)  
49  
50

- 1  
2  
3 8. National Health Service. *Patient Online: the Key Benefits* [Internet]. England: NHS; n.d. Accessed on 2018 Mar 31. URL: <https://www.england.nhs.uk/patient-online/learning-so-far/key-benefits>
- 4  
5  
6  
7  
8 9. eHealth Saskatchewan. *Citizen Health Information Portal: Personal Benefits of CHIP* [Internet]. SK: eHealth Saskatchewan; n.d. Accessed on 2018 Mar 31. URL: <https://www.ehealthsask.ca/citizen-engagement/CHIP/Pages/Personal-Benefits-of-CHIP.aspx>
- 9  
10  
11  
12  
13 10. Kipping S, Stuckey M, Hernandez A, et al. A web-based patient portal for mental health care: benefits evaluation. *J Med Internet Res* 2016;18(11),e294.
- 14  
15  
16  
17 11. Kelly MM, Hoonakker PLT, Dean SM. Using an inpatient portal to engage families in pediatric hospital care. *J Am Med Inform Assoc* 2017;24(1);153-161.
- 18  
19  
20  
21 12. Osborn CY, Mayberry LS, Wallston KA, et al. Understanding patient portal use: implications for medication management. *J Med Internet Res* 2013;15(7);e133.
- 22  
23  
24 13. Sarkar U, Lyles CR, Parker MM, et al. Use of the refill function through an online patient portal is associated with improved adherence to statins in an integrated health system. *Med Care* 2014;52(3);194-201.
- 25  
26  
27  
28 14. Urowitz S, Wiljer D, Dupak K, et al. Improving diabetes management with a patient portal: qualitative study of a diabetes self-management portal. *J Med Internet Res* 2012;14(6);e158.
- 29  
30  
31  
32 15. Wade-Vuturo AE, Mayberry LS, Osborn CY. Secure messaging and diabetes management: experiences and perspectives of patient portal users. *J Am Med Inform Assoc* 2013;20;519-525.
- 33  
34  
35  
36 16. Davis SE, Osborn CY, Kripalani S, et al. Health literacy, education levels, and patient portal usage during hospitalizations. *AMIA Annu Symp Proc* 2015;1871-1880.
- 37  
38  
39  
40 17. Gordon NP, Hornbrook MC Differences in access to and preferences for using patient portals and other eHealth technologies based on race, ethnicity, and age: A database and survey study of seniors in a large health plan. *J Med Internet Res* 2016;18(3);e50.
- 41  
42  
43  
44 18. Tieu L, Schillinger D, Sarkar U, et al. Online patient websites for electronic health record access among vulnerable populations: portals to nowhere? *J Am Med Inform Assoc* 2017;24(e1);e47-e54.
- 45  
46  
47  
48  
49 19. Kruse CS, Argueta DA, Lopez L, et al. Patient and provider attitudes toward the use of patient portals for the management of chronic diseases: a systematic review. *J Med Internet Res* 2015;17(2);e40.

- 1  
2  
3 20. Gold M, McLaughlin C. Assessing HITECH implementation and lessons: 5 years later.  
4 *Milbank Q* 2016;94(3);654-687.  
5
- 6  
7 21. Amante DJ, Hogan TP, Pagoto SL, et al. A systematic review of electronic portal usage  
8 among patients with diabetes. *Diabetes Technol Ther* 2014;16(11);1-10.  
9
- 10  
11 22. Bush RA, Connelly CD, Fuller M, et al. Implementation of the integrated electronic  
12 patient portal in the pediatric population: a systematic review. *Telemed J E Health*  
13 2016;22(2). doi: 10.1089/tmj.2015.0033  
14
- 15  
16 23. Ammenwerth E, Schnell-Inderst P, Hoerbst A. The impact of electronic patient portals on  
17 patient care: a systematic review of controlled trials. *J Med Internet Res* 2013;14(6);e162.  
18
- 19  
20 24. Powell KR. Patient-perceived facilitators of and barriers to electronic portal use. *Comput*  
21 *Inform Nurs* 2017;35(11);565-573.  
22
- 23  
24 25. Otte-Trojel T, de Bont A, Rundall TG, et al. What do we know about developing patient  
25 portals? A systematic literature review. *J Am Med Inform Assoc* 2016;23(e1);e162-168.  
26
- 27  
28 26. Jones JB, Weiner JP, Shah NR, et al. The wired patient: Patterns of electronic patient  
29 portal use among patients with cardiac disease or diabetes. *J Med Internet Res*  
30 2015;17(2);e42. doi:10.2196/jmir.3157  
31
- 32  
33 27. Kruse CS, Bolton K, Freriks G. The effect of patient portals on quality outcomes and its  
34 implications to meaningful use: A systematic review. *J Med Internet Res* 2015;17(2);e44.  
35
- 36  
37 28. Leveille SG, Mejilla R, Ngo L, et al. Do patients who access clinical information on  
38 patient internet portals have more primary care visits? *Med Care* 2016;54(1);17-23.  
39
- 40  
41 29. Jilka SR, Callahan R, Sevdalis N, et al. "Nothing about me without me": An  
42 interpretative review of patient accessible electronic health records. *J Med Internet Res*  
43 2015;17(6);e161.  
44
- 45  
46 30. Pollock A, Campbell P, Brunton G, et al. Selecting and implementing overview methods:  
47 implications from five exemplar overviews. *Syst Rev* 2017;6;145.  
48
- 49  
50 31. Smith V, Devane D, Begley CM, et al. Methodology in conducting a systematic review  
51 of systematic reviews of healthcare interventions. *BMC Med Res Methodol* 2011;11;15.  
52
- 53  
54 32. Benbassat J, Taragin MI The effect of clinical interventions on hospital readmissions: a  
55 meta-review of published meta-analyses. *Isr J Health Policy Res* 2013;2;1.  
56
- 57  
58 33. Parke HL, Epiphaniou E, Pearce G, et al. Self-management support interventions for  
59 stroke survivors: A systematic meta-review. *PLoS ONE* 2015;10(7);e0131448.  
60

- 1  
2  
3 34. Pinnock H, Parke HL, Panagioti M., et al. Systematic meta-review of supported self-  
4 management for asthma: a healthcare perspective. *BMC Med* 2017;15;64.  
5  
6  
7 35. Savard LA, Thompson DR, Clark AM A meta-review of evidence on heart failure disease  
8 management programs: the challenges of describing and synthesizing evidence on  
9 complex interventions. *Trials* 2011;12;194.  
10  
11 36. Hartling L, Chisholm A, Thomson D, et al. A descriptive analysis of overviews of  
12 reviews published between 2000 and 2011. *PLoS ONE* 2012;7;e49667.  
13  
14 37. Grant NK, Booth A. A typology of reviews: an analysis of 14 review types and  
15 associated methodologies. *Health Info Libr J* 2009;26;91-108.  
16  
17 38. Pare G, Trudel MC, Jaana M, et al. Synthesizing information systems knowledge: a  
18 typology of literature reviews. *Information & Management* 2015;52;183-199.  
19  
20 39. Aromataris E, Fernandez R, Godfrey CM, et al. Summarizing systematic reviews:  
21 methodological development, conduct and reporting of an umbrella review approach. *Int*  
22 *J Evid Based Healthc* 2015;13;132-140.  
23  
24 40. Aromataris E, Fernandez R, Godfrey C, et al. Chapter 10: Umbrella Reviews. In:  
25 Aromataris E, Munn Z (Editors). *Joanna Briggs Institute Reviewer's Manual*. [Internet].  
26 The Joanna Briggs Institute, 2017. Accessed on 2018 Apr 2. URL:  
27 <https://reviewersmanual.joannabriggs.org/>  
28  
29 41. Berkman ND, Lohr KN, Ansari MT, et al. Grading the strength of a body of evidence  
30 when assessing health care interventions: an EPC update. *J Clin Epidemiol*  
31 2015;68(11);1312-1324.  
32  
33 42. Gibbons MC, Wilson RF, Samal L, et al. Impact of Consumer Health Informatics  
34 Applications. Evidence Report/Technology Assessment No. 188. (Prepared by Johns  
35 Hopkins University Evidence-based Practice Center under contract No. HHS 290-2007-  
36 10061-I). AHRQ Publication No. 09(10)-E019. Rockville, MD. *Agency for Healthcare*  
37 *Research and Quality*. Oct 2009.  
38  
39 43. Sandelowski M, Voils CI, Leeman J, et al. Mapping the mixed methods–mixed research  
40 synthesis terrain. *J Mixed Methods Res* 2012;6(4);317–331.  
41  
42 44. Lewin S, Glenton C, Munthe-Kaas H, et al. Using qualitative evidence in decision  
43 making for health and social interventions: an approach to assess confidence in findings  
44 from qualitative evidence syntheses (GRADE-CERQual). *PLoS Med* 2015;12;e1001895.  
45  
46 45. Biondi-Zoccai G. (Ed.) *Umbrella Reviews: Evidence Synthesis with Overviews of*  
47 *Reviews and Meta-Epidemiologic Studies*. 2016; Springer International.  
48  
49  
50  
51  
52  
53  
54  
55  
56  
57  
58  
59  
60

- 1  
2  
3  
4  
5  
6  
7  
8  
9  
10  
11  
12  
13  
14  
15  
16  
17  
18  
19  
20  
21  
22  
23  
24  
25  
26  
27  
28  
29  
30  
31  
32  
33  
34  
35  
36  
37  
38  
39  
40  
41  
42  
43  
44  
45  
46  
47  
48  
49  
50  
51  
52  
53  
54  
55  
56  
57  
58  
59  
60
46. Ocloo J, Garfield S, Dawson S, et al. Exploring the theory, barriers and enablers for patient and public involvement across health, social care and patient safety: a protocol for a systematic review of reviews. *BMJ Open* 2017;7:e018426. doi:10.1136/bmjopen-2017-018426
  47. Rouleau G, Gagnon M-P, Côté J, et al. Effects of e-learning in a continuing education context on nursing care: a review of systematic qualitative, quantitative and mixed studies reviews (protocol). *BMJ Open* 2017;7:e018441. doi:10.1136/bmjopen-2017-018441
  48. Thomson K, Bambra C, McNamara C, et al. The effects of public health policies on population health and health inequalities in European welfare states: protocol for an umbrella review. *Systematic Reviews* 2016;5:57.
  49. Pollock M, Fernandes RM, Becker LA, et al. What guidance is available for researchers conducting overviews of reviews of healthcare interventions? A scoping review and qualitative metasummary. *Systematic Reviews* 2016;5(1):190.
  50. Apostolo J, Cooke R, Bobrowicz-Campos E, et al. Predicting risk and outcomes for frail older adults: an umbrella review of frailty screening tools. *JBI Database of Systematic Reviews and Implementation Reports* 2017
  51. Rouleau G, Gagnon MP, Côté J, et al. Impact of information and communication technologies on nursing care: Results of an overview of systematic reviews. *J Med Internet Res* 2017;19(4):e122. doi: 10.2196/jmir.6686
  52. Wiechula R, Conroy T, Kitson AL, et al. Umbrella review of the evidence: what factors influence the caring relationship between a nurse and patient? *J Advanced Nurs* 2016;72(4):723–734. doi: 10.1111/jan.12862
  53. Shamseer L, Moher D, Clarke M, et al. Preferred reporting items for systematic review and meta-analysis protocols (PRISMA-P) 2015: elaboration and explanation. *BMJ* 2015;350:g7647. doi:10.1136/bmj.g7647
  54. Price M, Lau F. The clinical adoption meta-model: a temporal meta-model describing the clinical adoption of health information systems. *BMC Med Inform Decis Mak* 2014;14(43):1-10.
  55. Lau F, Kuziemski C, Price M, et al. A review of systematic reviews on health information system studies. *J Am Med Inform Assoc* 2010;17:637-645.
  56. Stern C, Jordan Z, & McArthur A. Developing the review question and inclusion criteria. *Am J Nurs* 2014;114(4):53-56.

- 1  
2  
3 57. Shea BJ, Grimshaw JM, Wells GA, et al. Development of AMSTAR: a measurement tool  
4 to assess the methodological quality of systematic reviews. *BMC Med Res Methodol*  
5 2007;7;10. doi:10.1186/1471-2288-7-10  
6  
7  
8 58. Shea BJ, Reeves BC, Wells G, et al. AMSTAR 2: a critical appraisal tool for systematic  
9 reviews that include randomised or non-randomised studies of healthcare interventions,  
10 or both. *BMJ* 2017;358;j4008.  
11  
12 59. Whiting P, Savovic J, Higgins JPT, et al. ROBIS: a new tool to assess risk of bias in  
13 systematic reviews. *J Clin Epidemiol* 2016;69;225-234.  
14  
15 60. National Collaborating Centre for Methods and Tools. *Health Evidence™ Quality*  
16 *Assessment Tool*. Hamilton, ON: McMaster University. September, 2017. Accessed on  
17 2018 May 18. URL: <http://www.nccmt.ca/resources/search/275>.  
18  
19  
20 61. Tong A, Flemming K, McInnes E, et al. Enhancing transparency in reporting the  
21 synthesis of qualitative research: ENTREQ. *BMC Med Res Methodol* 2012;2;181.  
22 doi:10.1186/1471-2288-12-181  
23  
24 62. Murad MH, Mustafa R, Morgan R, et al. Rating the quality of evidence is by necessity a  
25 matter of judgment. *J Clin Epidemiol* 2016;74;237–238.  
26  
27 63. Pollock A, Brady MC, Farmer SE, et al. The purpose of rating quality of evidence differs  
28 in an overview, as compared to guidelines or recommendations. *J Clin Epidemiol*  
29 2016;74;238–240.  
30  
31  
32 64. Pieper D, Antoine S, Mathes T, et al. Systematic review finds overlapping reviews were  
33 not mentioned in every other overview. *J Clin Epidemiol* 2014;67;368-375.  
34  
35  
36 65. Shrier I, Boivin JF, Steele RJ, et al. Should meta-analyses of interventions include  
37 observational studies in addition to randomized controlled trials? A critical examination  
38 of underlying principles. *Am J Epidemiol* 2007;166(10);1203–1209.  
39  
40  
41 66. Thomas J, Harden A. Methods for the thematic synthesis of qualitative research in  
42 systematic reviews. *BMC Med Res Methodol* 2008;8:45.  
43  
44 67. Garg AX, Adhikari NK, McDonald H, et al. Effects of computerized clinical decision  
45 support systems on practitioner performance and patient outcomes: a systematic review.  
46 *JAMA* 2005;293:1223e38.  
47  
48  
49 68. Lewin S, Booth A, Glenton C, et al. Applying GRADE-CERQual to qualitative evidence  
50 synthesis findings: introduction to the series. *Implement Sci* 2018;13(Suppl 1):2. doi:  
51 10.1186/s13012-017-0688-3.  
52  
53  
54 69. Lewin S, Bohren M, Rashidian A, et al. Applying GRADE-CERQual to qualitative  
55 evidence synthesis findings—paper 2: how to make an overall CERQual assessment of  
56  
57  
58  
59



confidence and create a Summary of Qualitative Findings table. *Implement Sci* 2018;13(1);10.

70. Munthe-Kaas H, Bohren MA, Glenton C, et al. Applying GRADE-CERQual to qualitative evidence synthesis findings—paper 3: how to assess methodological limitations. *Implement Sci* 2018;13(1);9.
71. Colvin CJ, Garside R, Wainwright M, et al. Applying GRADE-CERQual to qualitative evidence synthesis findings—paper 4: how to assess coherence. *Implement Sci* 2018;13(1);13.
72. Glenton C, Carlsen B, Lewin S, et al. Applying GRADE-CERQual to qualitative evidence synthesis findings—paper 5: how to assess adequacy of data. *Implement Sci* 2018;13(1);14.
73. Noyes J, Booth A, Lewin S., et al. Applying GRADE-CERQual to qualitative evidence synthesis findings—paper 6: how to assess relevance of the data. *Implement Sci* 2018;13(1);4.
74. Logue MD, Efken JA Validating the personal health records adoption model using a modified e-Delphi. *J Adv Nurs* 2013;69(3);685-696.
75. McGinn CA, Gagnon MP, Shaw N, et al. Users' perspectives of key factors to implementing electronic health records in Canada: a Delphi study. *BMC Med Inform Decis Mak* 2012;12(105);1-13.

## AUTHORS' CONTRUBUTIONS

MA and FL developed the intellectual idea for the review. FL led the development of the major aspects of study design, methods and analysis. MA and OP provided suggestions on study methods. OP and MA developed approaches to dealing with qualitative and mixed-synthesis aspects. OP collaborated with a librarian to develop the search strategy and procured a Covidence© seat. OP and FL drafted the protocol and its various components. MA contributed to the intellectual development of the protocol, commenting on drafts. FL, MA, and OP all helped to resolve disagreement and reach consensus. OP revised the protocol with inputs from FL and MA.

## ACKNOWLEDGMENTS

1  
2  
3 We would like to acknowledge Ms. Linda Slater, a health care librarian at the University of  
4  
5 Alberta, Canada, for her able assistance with developing and pilot-testing comprehensive search  
6  
7 strategies. In addition, we are thankful to the reviewers for their helpful feedback.  
8  
9

#### 10 **FUNDING STATEMENT**

11  
12 This research received no specific grant from any funding agency in the public, commercial or  
13  
14 not-for-profit sectors.  
15  
16

#### 17 **COMPETING INTERESTS STATEMENT**

18  
19 None  
20  
21  
22  
23  
24  
25  
26  
27  
28  
29  
30  
31  
32  
33  
34  
35  
36  
37  
38  
39  
40  
41  
42  
43  
44  
45  
46  
47  
48  
49  
50  
51  
52  
53  
54  
55  
56  
57  
58  
59  
60



**Synthesizing and Translating Evidence on Patient Portals:  
A Protocol for an Umbrella Review with Stakeholder Engagement**

Petrovskaya O,<sup>1</sup> Lau F,<sup>2</sup> Antonio M<sup>2</sup>

<sup>1</sup>University of Alberta, <sup>2</sup>University of Victoria

**Supplementary File  
MEDLINE Search Strategy**

**Ovid MEDLINE(R) Epub Ahead of Print, In-Process & Other Non-Indexed Citations, Ovid MEDLINE(R) Daily and Ovid MEDLINE(R) <1946 to Present>**

-----

1 patient portals/  
2 ((patient\* or consumer\*) adj2 portal\*).ti,ab,kf.  
3 (portal hypertension or portal vein\* or portal venous or ((proton or carbon) adj2 portal\*)).mp.  
4 2 not 3  
5 1 or 4  
6 (exp "Health Records, Personal"/ or "Patient Access to Records"/) and (electronic or online or internet or web or portal\* or tethered).mp.  
7 ((tethered adj3 record\*) or eclinician or mychart).ti,ab,kf.  
8 1 or 5 or 6 or 7  
9 meta-analysis.pt.  
10 (meta-anal\$ or metaanal\$).mp.  
11 ((quantitativ\$ adj3 review\$1) or (quantitativ\$ adj3 overview\$)).mp.  
12 ((systematic\$ adj3 review\$) or (systematic adj3 overview\$)).mp.  
13 ((methodologic adj3 review\$1) or (methodologic adj3 overview\$)).mp.  
14 (integrat\$ adj5 research).mp.  
15 (quantitativ\$ adj3 synthes\$).mp.  
16 ((qualitative\* adj3 (review\* or overview)) or (meta-synthes\* or metasynthes\*)).mp.  
17 or/9-16  
18 review.pt. or (review\$ or overview\$).mp.  
19 (medline or medlars or pubmed or index medicus or embase or cochrane).mp.  
20 (scisearch or web of science or psycinfo or psychinfo or cinahl or cinhal).mp.  
21 (excerpta medica or psychlit or psyclit or current contents or science citation index or sciences citation index or scopus).mp.

- 1  
2  
3 22 (hand search\$ or manual search\$).mp.  
4  
5 23 ((electronic adj3 database\$) or (bibliographic adj3 database\$) or periodical index\$).mp.  
6  
7 24 (pooling or pooled or mantel haenszel).mp.  
8  
9 25 (peto or der simonian or dersimonian or fixed effect\$).mp.  
10  
11 26 ((combine\$ or combining) adj5 (data or trial or trials or studies or study or result or results)).mp.  
12  
13 27 or/19-26  
14  
15 28 18 and 27  
16  
17 29 17 or 28  
18  
19 30 (hta\$ or health technology assessment\$ or biomedical technology assessment\$).mp.  
20  
21 31 technology assessment, biomedical/ or biomedical technology assessment/  
22  
23 32 30 or 31  
24  
25 33 29 or 32  
26  
27 34 8 and 33  
28  
29  
30  
31  
32  
33  
34  
35  
36  
37  
38  
39  
40  
41  
42  
43  
44  
45  
46  
47  
48  
49  
50  
51  
52  
53  
54  
55  
56  
57  
58  
59  
60

# Reporting checklist for protocol of a systematic review.

Based on the PRISMA-P guidelines.

## Instructions to authors

Complete this checklist by entering the page numbers from your manuscript where readers will find each of the items listed below.

Your article may not currently address all the items on the checklist. Please modify your text to include the missing information. If you are certain that an item does not apply, please write "n/a" and provide a short explanation.

Upload your completed checklist as an extra file when you submit to a journal.

In your methods section, say that you used the PRISMA-P reporting guidelines, and cite them as:

Moher D, Shamseer L, Clarke M, Ghersi D, Liberati A, Petticrew M, Shekelle P, Stewart LA. Preferred Reporting Items for Systematic Review and Meta-Analysis Protocols (PRISMA-P) 2015 statement. *Syst Rev.* 2015;4(1):1.

|                |     | Reporting Item                                                                                                                                                              | Page Number |
|----------------|-----|-----------------------------------------------------------------------------------------------------------------------------------------------------------------------------|-------------|
| Identification | #1a | Identify the report as a protocol of a systematic review                                                                                                                    | 1           |
| Update         | #1b | If the protocol is for an update of a previous systematic review, identify as such                                                                                          | n/a         |
|                | #2  | If registered, provide the name of the registry (such as PROSPERO) and registration number                                                                                  | 7           |
| Contact        | #3a | Provide name, institutional affiliation, e-mail address of all protocol authors; provide physical mailing address of corresponding author                                   | 1           |
| Contribution   | #3b | Describe contributions of protocol authors and identify the guarantor of the review                                                                                         | 24          |
|                | #4  | If the protocol represents an amendment of a previously completed or published protocol, identify as such and list changes; otherwise, state plan for documenting important | n/a         |

|    |                                         |      |                                                                                                                                                                                                                               |          |
|----|-----------------------------------------|------|-------------------------------------------------------------------------------------------------------------------------------------------------------------------------------------------------------------------------------|----------|
| 1  |                                         |      | protocol amendments                                                                                                                                                                                                           |          |
| 2  | Sources                                 | #5a  | Indicate sources of financial or other support for the review                                                                                                                                                                 | 24       |
| 3  |                                         |      |                                                                                                                                                                                                                               |          |
| 4  | Sponsor                                 | #5b  | Provide name for the review funder and / or sponsor                                                                                                                                                                           | n/a      |
| 5  |                                         |      |                                                                                                                                                                                                                               |          |
| 6  | Role of sponsor or funder               | #5c  | Describe roles of funder(s), sponsor(s), and / or institution(s), if any, in developing the protocol                                                                                                                          | n/a      |
| 7  |                                         |      |                                                                                                                                                                                                                               |          |
| 8  |                                         |      |                                                                                                                                                                                                                               |          |
| 9  |                                         |      |                                                                                                                                                                                                                               |          |
| 10 | Rationale                               | #6   | Describe the rationale for the review in the context of what is already known                                                                                                                                                 | 3,4,5    |
| 11 |                                         |      |                                                                                                                                                                                                                               |          |
| 12 |                                         |      |                                                                                                                                                                                                                               |          |
| 13 |                                         |      |                                                                                                                                                                                                                               |          |
| 14 | Objectives                              | #7   | Provide an explicit statement of the question(s) the review will address with reference to participants, interventions, comparators, and outcomes (PICO)                                                                      | 7,11     |
| 15 |                                         |      |                                                                                                                                                                                                                               |          |
| 16 |                                         |      |                                                                                                                                                                                                                               |          |
| 17 |                                         |      |                                                                                                                                                                                                                               |          |
| 18 |                                         |      |                                                                                                                                                                                                                               |          |
| 19 | Eligibility criteria                    | #8   | Specify the study characteristics (such as PICO, study design, setting, time frame) and report characteristics (such as years considered, language, publication status) to be used as criteria for eligibility for the review | 10,11,12 |
| 20 |                                         |      |                                                                                                                                                                                                                               |          |
| 21 |                                         |      |                                                                                                                                                                                                                               |          |
| 22 |                                         |      |                                                                                                                                                                                                                               |          |
| 23 |                                         |      |                                                                                                                                                                                                                               |          |
| 24 |                                         |      |                                                                                                                                                                                                                               |          |
| 25 |                                         |      |                                                                                                                                                                                                                               |          |
| 26 | Information sources                     | #9   | Describe all intended information sources (such as electronic databases, contact with study authors, trial registers or other grey literature sources) with planned dates of coverage                                         | 9,10     |
| 27 |                                         |      |                                                                                                                                                                                                                               |          |
| 28 |                                         |      |                                                                                                                                                                                                                               |          |
| 29 |                                         |      |                                                                                                                                                                                                                               |          |
| 30 | Search strategy                         | #10  | Present draft of search strategy to be used for at least one electronic database, including planned limits, such that it could be repeated                                                                                    | 10       |
| 31 |                                         |      |                                                                                                                                                                                                                               |          |
| 32 |                                         |      |                                                                                                                                                                                                                               |          |
| 33 |                                         |      |                                                                                                                                                                                                                               |          |
| 34 |                                         |      |                                                                                                                                                                                                                               |          |
| 35 |                                         |      |                                                                                                                                                                                                                               |          |
| 36 |                                         |      |                                                                                                                                                                                                                               |          |
| 37 | Study records - data management         | #11a | Describe the mechanism(s) that will be used to manage records and data throughout the review                                                                                                                                  | 12       |
| 38 |                                         |      |                                                                                                                                                                                                                               |          |
| 39 |                                         |      |                                                                                                                                                                                                                               |          |
| 40 |                                         |      |                                                                                                                                                                                                                               |          |
| 41 | Study records - selection process       | #11b | State the process that will be used for selecting studies (such as two independent reviewers) through each phase of the review (that is, screening, eligibility and inclusion in meta-analysis)                               | 12       |
| 42 |                                         |      |                                                                                                                                                                                                                               |          |
| 43 |                                         |      |                                                                                                                                                                                                                               |          |
| 44 |                                         |      |                                                                                                                                                                                                                               |          |
| 45 |                                         |      |                                                                                                                                                                                                                               |          |
| 46 |                                         |      |                                                                                                                                                                                                                               |          |
| 47 |                                         |      |                                                                                                                                                                                                                               |          |
| 48 | Study records - data collection process | #11c | Describe planned method of extracting data from reports (such as piloting forms, done independently, in duplicate), any processes for obtaining and confirming data from investigators                                        | 14,15    |
| 49 |                                         |      |                                                                                                                                                                                                                               |          |
| 50 |                                         |      |                                                                                                                                                                                                                               |          |
| 51 |                                         |      |                                                                                                                                                                                                                               |          |
| 52 |                                         |      |                                                                                                                                                                                                                               |          |
| 53 |                                         |      |                                                                                                                                                                                                                               |          |
| 54 |                                         |      |                                                                                                                                                                                                                               |          |
| 55 | Data items                              | #12  | List and define all variables for which data will be sought (such as PICO items, funding sources), any pre-planned data assumptions and simplifications                                                                       | 15       |
| 56 |                                         |      |                                                                                                                                                                                                                               |          |
| 57 |                                         |      |                                                                                                                                                                                                                               |          |
| 58 |                                         |      |                                                                                                                                                                                                                               |          |
| 59 |                                         |      |                                                                                                                                                                                                                               |          |
| 60 |                                         |      |                                                                                                                                                                                                                               |          |

|    |                    |      |                                                                                 |       |
|----|--------------------|------|---------------------------------------------------------------------------------|-------|
| 1  | Outcomes and       | #13  | List and define all outcomes for which data will be sought,                     | 15    |
| 2  | prioritization     |      | including prioritization of main and additional outcomes, with                  |       |
| 3  |                    |      | rationale                                                                       |       |
| 4  |                    |      |                                                                                 |       |
| 5  |                    |      |                                                                                 |       |
| 6  | Risk of bias in    | #14  | Describe anticipated methods for assessing risk of bias of                      | 13,14 |
| 7  | individual studies |      | individual studies, including whether this will be done at the                  |       |
| 8  |                    |      | outcome or study level, or both; state how this information will                |       |
| 9  |                    |      | be used in data synthesis                                                       |       |
| 10 |                    |      |                                                                                 |       |
| 11 |                    |      |                                                                                 |       |
| 12 |                    |      |                                                                                 |       |
| 13 | Data synthesis     | #15a | Describe criteria under which study data will be quantitatively                 | n/a   |
| 14 |                    |      | synthesised                                                                     |       |
| 15 |                    |      |                                                                                 |       |
| 16 |                    |      |                                                                                 |       |
| 17 |                    | #15b | If data are appropriate for quantitative synthesis, describe                    | n/a   |
| 18 |                    |      | planned summary measures, methods of handling data and                          |       |
| 19 |                    |      | methods of combining data from studies, including any                           |       |
| 20 |                    |      | planned exploration of consistency (such as I <sup>2</sup> , Kendall's $\tau$ ) |       |
| 21 |                    |      |                                                                                 |       |
| 22 |                    |      |                                                                                 |       |
| 23 |                    |      |                                                                                 |       |
| 24 |                    | #15c | Describe any proposed additional analyses (such as                              | n/a   |
| 25 |                    |      | sensitivity or subgroup analyses, meta-regression)                              |       |
| 26 |                    |      |                                                                                 |       |
| 27 |                    |      |                                                                                 |       |
| 28 |                    | #15d | If quantitative synthesis is not appropriate, describe the type                 | 15,16 |
| 29 |                    |      | of summary planned                                                              |       |
| 30 |                    |      |                                                                                 |       |
| 31 | Meta-bias(es)      | #16  | Specify any planned assessment of meta-bias(es) (such as                        | 16    |
| 32 |                    |      | publication bias across studies, selective reporting within                     |       |
| 33 |                    |      | studies)                                                                        |       |
| 34 |                    |      |                                                                                 |       |
| 35 |                    |      |                                                                                 |       |
| 36 |                    |      |                                                                                 |       |
| 37 | Confidence in      | #17  | Describe how the strength of the body of evidence will be                       | 16,17 |
| 38 | cumulative         |      | assessed (such as GRADE)                                                        |       |
| 39 | evidence           |      |                                                                                 |       |
| 40 |                    |      |                                                                                 |       |
| 41 |                    |      |                                                                                 |       |

42 The PRISMA-P checklist is distributed under the terms of the Creative Commons Attribution License  
 43 CC-BY 4.0. This checklist was completed on 27. May 2018 using <http://www.goodreports.org/>, a tool  
 44 made by the [EQUATOR Network](#) in collaboration with [Penelope.ai](#)  
 45  
 46  
 47  
 48  
 49  
 50  
 51  
 52  
 53  
 54  
 55  
 56  
 57  
 58  
 59  
 60
